# Supplementary material for: Burden of visual impairment associated with eye diseases: exploratory survey of 298 Chinese patients
Source: PubMed Central journal article supplement — BMJ Open. 2019 Sep 12;9(9):e030561. doi: 10.1136/bmjopen-2019-030561 (PMC6747637; doi:10.1136/bmjopen-2019-030561), 2019-09-12
Supplement: bmjopen-2019-030561.draft_revisions.pdf [file bmjopen-2019-030561.draft_revisions.pdf]

# BMJ Open

BMJ Open is committed to open peer review. As part of this commitment we make the peer review history of every article we publish publicly available.

When an article is published we post the peer reviewers' comments and the authors' responses online. We also post the versions of the paper that were used during peer review. These are the versions that the peer review comments apply to.

The versions of the paper that follow are the versions that were submitted during the peer review process. They are not the versions of record or the final published versions. They should not be cited or distributed as the published version of this manuscript.

BMJ Open is an open access journal and the full, final, typeset and author-corrected version of record of the manuscript is available on our site with no access controls, subscription charges or pay-per-view fees (<http://bmjopen.bmj.com>).

If you have any questions on BMJ Open's open peer review process please email [info.bmjopen@bmj.com](mailto:info.bmjopen@bmj.com)

# BMJ Open

## Burden of patients with visual impairment: a questionnaire survey in two tertiary hospitals in Beijing

|                               |                                                                                                                                                                                                                                                                                                                                                                                                                                                                                                                                                                                                                                                                               |
|-------------------------------|-------------------------------------------------------------------------------------------------------------------------------------------------------------------------------------------------------------------------------------------------------------------------------------------------------------------------------------------------------------------------------------------------------------------------------------------------------------------------------------------------------------------------------------------------------------------------------------------------------------------------------------------------------------------------------|
| Journal:                      | <i>BMJ Open</i>                                                                                                                                                                                                                                                                                                                                                                                                                                                                                                                                                                                                                                                               |
| Manuscript ID                 | bmjopen-2019-030561                                                                                                                                                                                                                                                                                                                                                                                                                                                                                                                                                                                                                                                           |
| Article Type:                 | Research                                                                                                                                                                                                                                                                                                                                                                                                                                                                                                                                                                                                                                                                      |
| Date Submitted by the Author: | 20-Mar-2019                                                                                                                                                                                                                                                                                                                                                                                                                                                                                                                                                                                                                                                                   |
| Complete List of Authors:     | Guan, Xiaodong; Peking University, Department of Pharmacy Administration and Clinical Pharmacy<br>Fu, Mengyuan; Peking University, Department of Pharmacy Administration and Clinical Pharmacy<br>Lin, Fanghui; Peking University, International Research Center for Medicinal Administration<br>Zhu, Dawei; Chinese Academy of Medical Sciences and Peking Union Medical College, Center for Health Policy and Management, Institute of Medical Information & Library<br>Vuillermin, Daniel; Peking University, School of Health Humanities<br>Shi, Luwen; School of Pharmaceutical Sciences, Peking University, Department of Pharmacy Administration and Clinical Pharmacy |
| Keywords:                     | economic burden, catastrophic healthcare expenditure, quality of life, visual impairment                                                                                                                                                                                                                                                                                                                                                                                                                                                                                                                                                                                      |
|                               |                                                                                                                                                                                                                                                                                                                                                                                                                                                                                                                                                                                                                                                                               |

SCHOLARONE™  
Manuscripts

1  
2 **1 Burden of patients with visual impairment: a questionnaire survey in two**  
3  
4 **2 tertiary hospitals in Beijing**

5  
6 3  
7 4 Xiaodong Guan,<sup>1,2</sup> Mengyuan Fu,<sup>1</sup> Fanghui Lin,<sup>2</sup> Dawei Zhu,<sup>2,3</sup> Daniel Vuillermin,<sup>4</sup> and Luwen  
8 Shi <sup>1,2\*</sup>  
9

10  
11 6  
12 7 <sup>1</sup> School of Pharmaceutical Sciences, Peking University, Beijing, China; <sup>2</sup> International  
13 Research Center for Medicinal Administration, Peking University, Beijing, China; <sup>3</sup> China  
14 Center for Health Development Studies, Peking University, Beijing, China; <sup>4</sup> School of Health  
15 Humanities, Peking University, Beijing, China  
16  
17  
18  
19

20  
21 11  
22 12 \* **Corresponding author.** Department of Pharmacy Administration and Clinical Pharmacy,  
23 School of Pharmaceutical Sciences, Peking University, No.38 Xueyuan Road, Haidian  
24 District, Beijing, 100191, China. Tel & Fax: 86-10-82805019. E-mail: [shiluwen211@163.com](mailto:shiluwen211@163.com)  
25  
26  
27

28 16 **Keywords:** economic burden, catastrophic healthcare expenditure, quality of life, visual  
29 impairment  
30  
31  
32

33 19  
34  
35 20 **Word count:** 2326  
36  
37  
38  
39  
40  
41  
42  
43  
44  
45  
46  
47  
48  
49  
50  
51  
52  
53  
54  
55  
56  
57  
58  
59  
60

1  
2 22 **Abstract**

3  
4 23 **Objectives** To quantify the economic burden, prevalence of catastrophic healthcare  
5 24 expenditure (CHE) and the quality of life (QoL) of patients with visual impairment (VI) in  
6 25 China.

7  
8 26 **Methods** We conducted a questionnaire survey from March to May 2016 by structured face-  
9 27 to-face interviews of patients with VI. The economic burden was estimated by calculating  
10 28 participants' direct costs covered in 2015 and the definition of CHE was out of pocket costs  
11 29 exceeding 30% of annual household income. QoL was weighed by health utility value using  
12 30 time trade off valuation techniques.

13  
14 31 **Results** A total of 302 patients were included and 298 completed questionnaires were  
15 32 eligible for the study, yielding a response rate of 98.7%. Annual direct costs per patient  
16 33 caused by VI were US\$6988.6±10834.3 and 70.3% were direct medical costs. 32.2%  
17 34 households suffered from CHE, especially for less wealthy patients who were blind, living  
18 35 in rural areas and without medical insurance. The health utility value was rated at 0.65 on  
19 36 average and patients who were blind, aged 51-57, living alone and insured by commercial  
20 37 medical insurance had relatively poorer QoL.

21 38 **Conclusion** Our study quantified the economic burden and QoL of patients with VI in  
22 39 China, indicating a substantial burden and poor life quality. Preferential medical insurance  
23 40 policies should be designed in relation to people with VI to further reduce the health  
24 41 inequalities, avoid the CHE and promote QoL.

1  
2 42 **Article Summary**

3  
4 43 **Strengths and limitations of this study**

5 44 1. To our knowledge, this is the first study to quantify the prevalence of CHE and the QoL of  
6  
7 45 patients with VI in China.

8  
9 46 2. The face-to-face interviews were conducted in tertiary general hospitals in Beijing, which  
10  
11 47 might result in potential sample selection bias.

12 48 3. There could have been recall bias because the data were self-reported by the patients.  
13  
14  
15  
16  
17  
18  
19  
20  
21  
22  
23  
24  
25  
26  
27  
28  
29  
30  
31  
32  
33  
34  
35  
36  
37  
38  
39  
40  
41  
42  
43  
44  
45  
46  
47  
48  
49  
50  
51  
52  
53  
54  
55  
56  
57  
58  
59  
60

## INTRODUCTION

With a rapidly aging population in mainland China, visual impairment (VI) is emerging as a public health concern [1]. According to the World Health Survey (2003), one in five adults reported some degree of far visual difficulty [2]. In 2015, the number of people with moderate VI or worse was estimated to be 253 million globally [3]. More than 80% of the global total of VI occurs in developing countries [4], and 26.5% of the total of VI occurs in China [5]. The prevalence of VI in China is 0.94% yet, as for the people older than 50, the prevalence rises to 5.8%. In Tibet, one of the highest and harshest human habitations on earth, the prevalence is 13.2% [6-8].

The main impact of VI is a diminished ability to perform daily activities [9], which often results in high health expenditures and the loss of independence [10]. The total financial cost of VI worldwide was estimated to be \$3 trillion in 2010 or \$4,030 per person who is visually impaired [11]. In addition to the economic burden, VI also has extensive social ramifications in terms of participation in society, employment and quality of life (QoL). The World Health Organization (WHO) estimated that 1% of the total global burden of disease measured as Disability-Adjusted Life Years (DALY) was attributable to VI increased by 47% from 12.9 million DALYs in 1990 to 18.8 million DALYs in 2010 [12-13].

The burden of VI has been well researched in countries such as the U.S., Australia, and some European countries [13-16]. However, little is known about the economic burden and QoL of patients with VI in China. Therefore, we aim to achieve an assessment to: quantify the economic burden; identify the prevalence of catastrophic healthcare expenditure (CHE); and describe the QoL of patients with VI in China.

## METHODS

### Questionnaire design

We conducted a questionnaire survey by structured face-to-face interviews of patients with VI. The study questionnaire included standardized items developed by reviewing related research as well as items developed by consulting ophthalmologists and pharmacists. The survey questionnaire included four parts: sociodemographic information, clinic-related information, economic burden and QoL.

#### *Sociodemographic information*

Age, gender, ethnicity, educational level, profession, marital status, living status, current living place, medical insurance, personal income, household size and household income were included.

#### *Clinic-related information*

1  
2 86 Healthcare service utilization, treatment history and visual condition were included. Visual  
3  
4 87 condition was divided into three categories based on the WHO vision visual acuity (VA)  
5  
6 88 categorization principles: moderate VI ( $6/60 < VA < 6/18$ ), severe VI ( $3/60 < VA < 6/60$ ) and  
7  
8 89 blind ( $VA < 3/60$ ) [17].

### 90 ***Economic burden***

91 Economic burden was estimated by calculating participants' direct costs covered in 2015,  
92 including direct medical costs and direct non-medical costs.

### 93 ***Quality of life***

94 QoL was weighed by the "utility value" to evaluate patients' perception of their own health,  
95 using time trade-off (TTO) valuation technique [18]. TTO determined the length of lifetime the  
96 respondent would be willing to forego to live in perfect health [19], by asking "Assuming you  
97 will only live for 10 years, what is the maximum amount of that time, if any, you would be  
98 willing to trade for a return to permanent perfect vision (1.0) during the years that remain?"

99 The questionnaire was designed and optimized by ophthalmologists and clinical  
100 pharmacists. After conducting a pilot field research study in a tertiary hospital in Beijing, all  
101 of the experts agreed that the questionnaire was valid. The items and descriptions of survey  
102 questionnaire were shown in **Appendix 1**.

### 103 104 **Recruitment and sampling**

105 Participants were eligible for inclusion in the study if they were diagnosed with moderate  
106 VI or worse in both eyes ( $VA < 6/18$ ) and were physically and mentally able to participate in  
107 the survey and agreed to participate in the study. We excluded participants who were pregnant,  
108 had a concomitant malignant disease or an inability to complete the questionnaire.

### 109 110 **Data collection and quality control**

111 A questionnaire survey was conducted from March to May 2016 by structured face-to-face  
112 interviews of patients admitted in ophthalmic department in two tertiary hospitals in Beijing.  
113 All the investigators were trained for standard processes via a workshop. During the face-to-  
114 face interviews, the investigators read all the contents of the questionnaire to establish that  
115 patients with VI could hear and understand the questions. The interviews lasted approximately  
116 0.5-1 hours to collect detailed information. Survey data were recorded on paper forms and  
117 translated using Epidata3.1.

### 118 119 120 **Outcome measures**

## 121 ***Catastrophic healthcare expenditure***

122 CHE was defined as out-of-pocket (OOP) for healthcare over a year that exceeded a certain  
123 proportion of a household's income. This threshold had been defined in many ways: one of  
124 the most common definitions was OOP costs exceeding 30% of annual household income [20].

## 125 ***Quality of life***

126 Answers to the time trade-off questions were converted to utility value.

$$127 Z = (10 - N) / 10$$

128 Z was the health utility value; N was the number of years that the respondents were willing  
129 to trade for a return to permanent perfect vision. Utility values were anchored on a scale  
130 between 0 (the preference for death rather than living in the patient's current state of health)  
131 and 1 (a perception of perfect health) [18].

## 133 **Statistical analysis**

134 Costs and income were assessed in Chinese Yuan (CNY) and converted into United States  
135 dollars (USD) uniformly based on exchange rates in June 1, 2016 (1 USD=6.5889 CNY) to  
136 make the results more comparable to other published studies.

137 STATA 14.0 was applied to conduct the following statistical analysis: (a) descriptive  
138 analysis of the participants' demographic information, healthcare service utilization,  
139 expenditures, CHE prevalence and QoL; (b) bivariate chi-square test on the difference of CHE  
140 prevalence and QoL value between subgroups. The level of statistical significance was  $p <$   
141 0.05 (two-sided).

## 143 **Ethics Statement**

144 Ethics committee approval obtained from Peking University Institution Review Board  
145 (No. IRB00001052-16003). All participants were informed by an information sheet and  
146 have signed the declaration of consent to participate in the study.

## 148 **RESULTS**

### 149 **Description of demographic characteristics**

150 A total of 302 patients were included and 298 completed questionnaires were eligible for  
151 this study, yielding a response rate of 98.7%. Patients' demographic data are shown in **Table**  
152 **1**. The mean age in sample was 65.4 and there were slightly fewer males (47.7%). Most of the  
153 participants were married (85.2%), living with family (94.6%) and in urban areas (71.8%).  
154 41.3% of the participants were covered by Urban Employee Basic Medical Insurance  
155 (UEBMI), 23.8% by New Cooperative Medical Scheme (NCMS), 14.1% by Government



1  
2 156 Medical Insurance (GMI), and 13.4% by Urban Resident Basic Medical Insurance (URBMI).  
3  
4 157 Of the visual-related health conditions reported, 58.4% had moderate VI, 28.9% had severe  
5 158 VI, and 12.8% were blind. 71.8% of the participants had been suffered from VI for more than  
6  
7 159 one year. The annual personnel income and household income of the participants were  
8  
9 160 US\$6,266.4±10,403.2 and US\$13,457.8±16,711.9, respectively.

10 161

### 12 162 **Healthcare service utilization**

14 163 As shown in **Table 1**, the average number of healthcare service utilization due to VI within  
15  
16 164 1 year was 9.7 outpatient visits, ranging from 4.8 visits (cataract) to 16.7 visits (glaucoma).  
17  
18 165 Average number and length of inpatient hospital visits were 0.6 visit within 1 year and 2.7  
19 166 days of hospital staying per visit.

20 167

### 22 168 **Direct costs**

24 169 The total direct medical costs were US\$6,988.6±10,834.3 in 2015, including direct medical  
25  
26 170 costs of US\$4,909.8±8,981.7 (70.3%) and direct non-medical costs of US\$2,078.8±4,430.6  
27  
28 171 (29.7%).

29 172 As shown in **Table 2**, of the direct medical costs, outpatient fees represented the largest  
30  
31 173 costs at US\$3,408.5 (69.4%), followed by inpatient costs at US\$1,369.5 (27.9%). Except  
32  
33 174 outpatient and inpatient costs, the participants also purchased drugs by themselves in retail  
34  
35 175 pharmacy (2.7%). Only 10.6% of the outpatient costs, 24.4% of the inpatient costs and 2.6%  
36  
37 176 of the self-purchased drug costs were covered by the medical insurance. Average total OOP  
38 177 costs per patient were US\$4211.6 (85.8%).

39 178 Direct non-medical costs occurred mostly due to long-term home care at US\$1,216.6  
40  
41 179 (58.5%). Nutrition or assistive devices, food and accommodation, escort, transportation, and  
42  
43 180 home modifications costs accounted for 13.3%, 8.5%, 7.7%, 7.2% and 4.7% respectively.

44  
45 181 The specific costs among different groups were shown in the **Appendix 2**.

46 182

### 48 183 **Prevalence of CHE**

50 184 Patients with VI paid in direct medical costs an average amount equal to 111.5% of their  
51  
52 185 individual annual income and 51.9% of their household's annual income. As shown in **Table**  
53  
54 186 **1**, 32.2% households suffered from CHE caused by VI. The prevalence of CHE was generally  
55  
56 187 correlated with the severity of VI (moderate VI 28.2%, severe VI 31.4%, blind 52.6%;  $p<0.05$ ).  
57  
58 188 Patients living in rural areas generally had greater risk of CHE compared with urban residents  
59  
60 189 (47.6%, 26.2%;  $p<0.001$ ). Of all of the different types of medical insurances, the CHE  
190 prevalence of patients without medical insurance and insured by NCMS ostensibly

1  
2 191 outweighed those insured by GMI and CMI (none 50.0%, NCMS 47.9%, GMI 16.7%, CMI  
3 192 21.4%;  $p<0.01$ ). In relation to the patients' economic status, the less wealthy patients (those  
4 193 with the lowest or lower economic status) were much more likely to encounter CHE than  
5 194 wealthier patients ( $p<0.01$ ).

6  
7  
8  
9 195

## 10 196 **QoL**

11  
12 197 As shown in **Table 1**, the value of QoL was 0.65 on average and correlated with the severity  
13 198 of VI (moderate VI 0.69, severe VI 0.65, blind 0.49;  $p<0.01$ ). Middle-aged patients (51-70)  
14 199 had the poorest life quality (0.58;  $p<0.001$ ) and patients living alone had relatively poorer  
15 200 QoL than living with family (0.58, 0.68;  $p<0.01$ ). Of all of the different types of medical  
16 201 insurances, the health utility values of patients insured by CMI were significantly lower than  
17 202 those insured by URBMI (0.49, 0.81;  $p<0.01$ ).

18 203

## 19 204 **DISCUSSION**

20 205 This study quantified the economic burden and QoL of VI patients in China, indicating a  
21 206 substantial burden of VI, with considerable variation among the different age groups, rural or  
22 207 urban, type of medical insurance, visual condition and economic status.

23 208 We found annual direct cost per patient caused by VI in China was much lower than the  
24 209 US [13]. The direct medical costs occurred mostly due to outpatient visit, which was  
25 210 inconsistent with formal findings in the US. and Australia that direct medical costs occurred  
26 211 mostly due to hospitalization [13]. Previous studies demonstrated that even mild visual  
27 212 impairment had a significant and independent impact on vision-specific functioning [21] and  
28 213 diminished ability to perform activities of daily living alone, which led to long-term care for  
29 214 patients. Therefore, it was not surprising that the highest direct non-medical costs came from  
30 215 long-term home care (58.5%). A possible explanation for high nutrition or assistive devices  
31 216 costs (13.3%) in our study was that people in China were keen on buying nutrition or devices  
32 217 that usually advertised in the media [22], especially those visually impaired patients who rarely  
33 218 went out and had no other choices but to listen to TV for entertainment.

34 219 Our research showed that patients with VI had a relatively high financial burden in China,  
35 220 resulting in 32.2% households suffered from CHE. Patients with VI paid in direct costs an  
36 221 average amount equal to 111.5% of their individual annual income and 51.9% of their  
37 222 household's annual income, which indicated that the patients themselves are clearly unable to  
38 223 meet such substantial costs and the exorbitant burden was too costly for even the entire  
39 224 household to maintain. In particular, for households that have a lower economic status, the  
40 225 discrepancy between costs and income was greater, which made them more vulnerable facing

1  
2 226 the CHE. Furthermore, patients without medical insurance recording the highest CHE  
3  
4 227 prevalence and the relative CHE prevalence also differed among different medical insurances,  
5  
6 228 which may largely due to the different reimbursement rate of each insurance. Patients insured  
7  
8 229 by NCMS, with the relatively lowest reimbursement rate <sup>[23,24]</sup>, had substantially higher CHE  
9  
10 230 prevalence than those with highest reimbursement rate (GMI and CMI). As patients living in  
11  
12 231 rural areas have a relatively low income and were insured by NCMS <sup>[25]</sup>, they were ostensibly  
13  
14 232 at greater risk of CHE.

15 233 Except for the economic burden, our study also suggested that VI had a substantial negative  
16  
17 234 effect on health related QoL, and the life quality of patients with VI (0.65) in our study was  
18  
19 235 worse than patients with cancer (0.92), mild stroke (0.9), gout (0.86), heart failure (0.78) and  
20  
21 236 HIV/AIDS (0.70) <sup>[26]</sup>. This may largely due to the significant association between VI and  
22  
23 237 mental stress such as anxiety <sup>[27]</sup>, depression <sup>[10]</sup> and cognitive functions <sup>[28]</sup>. Among the study  
24  
25 238 population, the utility value decreased dramatically with perceived total loss of vision.  
26  
27 239 Previous studies have suggested that the utility values most highly correlated with the visual  
28  
29 240 acuity in the better seeing eye, and as the vision in the better seeing eye decreased, the  
30  
31 241 corresponding utility value decreased <sup>[29]</sup>. Besides, living with family could slightly enhance  
32  
33 242 the life quality than living alone in our study, because family members were often called on  
34  
35 243 to provide physical and emotional support <sup>[30]</sup>. However, unlike CHE, life quality of visual  
36  
37 244 impaired patients was not associated with their wealth and patients with the highest  
38  
39 245 reimbursement rate insurance (CMI) had the poorest life quality in our study. Thus, efforts  
40  
41 246 are needed to promote the access to adequate and effective treatment for visual impaired  
42  
43 247 patients to alleviate their diseases and recover their sight. Moreover, the government should  
44  
45 248 evade the inconvenience with daily living of the visual impaired patients by consciously  
46  
47 249 redesigning the built environment, public facilities and services.

48 250 We spent 3 months in two tertiary hospitals to interview 298 individuals. Due to the  
49  
50 251 limitation of movement for patients with VI in China several limitations to this study should  
51  
52 252 be noted. First, the face-to-face interviews were conducted in tertiary general hospitals in  
53  
54 253 Beijing, which might result in a sample with higher education level, income, treatment costs,  
55  
56 254 better health insurance, more serious disease than the average level of all the patients with VI  
57  
58 255 in China. Second, there could have been recall bias because the data were self-reported by the  
59  
60 256 patients.

257

258

259

260 **CONCLUSION**

1  
2 261 In general, our study quantified the economic burden and QoL of VI patients in China,  
3  
4 262 indicating that compared with people who were sighted, people with VI experienced greater  
5  
6 263 difficulties with daily living, higher economic burden, greater chance of CHE and poorer  
7  
8 264 QoL. The findings in this study suggested that preferential medical insurance policies should  
9  
10 265 be designed of VI to further reduce the health inequalities, avoid the CHE and enhance the  
11  
12 266 QoL.

13 267

14 268 **Acknowledgements** Our sincere appreciation to Professor Suodi Zhai and Chief Nurse Zheng  
15  
16 269 Liu from the sample hospitals who provided great support for this study. The authors  
17  
18 270 gratefully acknowledge all investigators participating in this study for their diligent work.

19 271 **Contributors:** Xiaodong Guan, Fanghui Lin and Luwen Shi conceptualised and designed the  
20  
21 272 study. Fanghui Lin and Mengyuan Fu conducted the questionnaire survey. Mengyuan Fu and  
22  
23 273 Dawei Zhu contributed to analysis of the data. Xiaodong Guan, Luwen Shi, Daniel Vuillermin  
24  
25 274 and Mengyuan Fu conducted the final analysis and drafted the initial manuscript. All authors  
26  
27 275 contributed to the critical revision of the paper and approved the final manuscript.

28 276 **Funding** This research received grant from Beijing Novartis Pharma Co., Ltd. The funders  
29  
30 277 had no role in study design, data collection and analysis, decision to publish, or preparation  
31  
32 278 of the manuscript.

33 279 **Competing interests** None declared.

34 280 **Ethics approval** Ethics committee approval obtained from Peking University Institution  
35  
36 281 Review Board (No. IRB00001052-16003). All participants were informed by an information  
37  
38 282 sheet and have signed the declaration of consent to participate in the study.

39  
40 283 **Provenance and peer review** Not commissioned; externally peer reviewed.

41 284 **Data sharing statement** No additional data are available.

285 **REFERENCE**

- 286
- 287 1. Park SJ, Ahn S, Woo SJ, Park KH. Extent of exacerbation of chronic health conditions by  
288 visual impairment in terms of health-related quality of life. *JAMA Ophthalmol.*  
289 2015;133:1267–1275.
- 290 2. Freeman EE, Roy-Gagnon MH, Samson E, et al. The global burden of visual difficulty in  
291 low, middle, and high income countries. *PLoS One.* 2013; 8(5):e63315.
- 292 3. Bourne RRA, Flaxman SR, Braithwaite T, et al. Magnitude, temporal trends, and  
293 projections of the global prevalence of blindness and distance and near vision impairment: a  
294 systematic review and meta-analysis. *Lancet Glob Health.* 2017;5: e888–e897.
- 295 4. Taylor HR, Pezzullo ML, Nesbitt SJ, Keeffe JE. Costs of interventions for visual  
296 impairment. *Am J Ophthalmol.* 2007;143:561–565.
- 297 5. World Health Organization. Global data on visual impairment 2010. Available from:  
298 <https://www.who.int/blindness/publications/globaldata/en/>, accessed 23 February 2019.
- 299 6. Cheng JW, Cheng SW, Cai JP, Li Y, Wei RL. The prevalence of visual impairment in older  
300 adults in mainland China: a systematic review and meta-analysis. *Ophthalmic Res.*  
301 2013;49:1–10.
- 302 7. Dunzhu S, Wang FS, Courtright P, et al. Blindness and eye diseases in Tibet: findings from  
303 a randomised, population based survey. *Br J Ophthalmol.* 2003;87:1443–1448.
- 304 8. National Bureau of Statistics of the People's Republic of China. The second national  
305 handicapped person sampling survey main data bulletin. Available from:  
306 <http://www.stats.gov.cn/tjsj/ndsj/shehui/2006/html/fu3.htm>, accessed 21 April 2017.
- 307 9. Lamoureux EL, Hassell JB, Keeffe JE. The determinants of participation in activities of  
308 daily living in people with impaired vision. *Am J Ophthalmol.* 2004;137:265–270.
- 309 10. Pascolini D, Mariotti SP. Global estimates of visual impairment: 2010. *Br J Ophthalmol.*  
310 2012;96:614–618.
- 311 11. Gordois A, Cutler H, Pezzullo L, et al. An estimation of the worldwide economic and  
312 health burden of visual impairment. *Glob Public Health.* 2012;7:465–481.
- 313 12. World Health Organization. World Health Report 2004: Changing History. Available  
314 from: <http://www.who.int/whr/2004/en/>, accessed 2 May 2017.
- 315 13. Köberlein J, Beifus K, Schaffert C, Finger RP. The economic burden of visual impairment  
316 and blindness: a systematic review. *BMJ Open.* 2013;3:e003471.
- 317 14. Gordon KD, Cruess AF, Bellan L, Mitchell S, Pezzullo ML. The cost of vision loss in  
318 Canada. *Can J Ophthalmol.* 2011;46:310–314.
- 319 15. Taylor HR, Pezzullo ML, Keeffe JE. The economic impact and cost of visual impairment  
320 in Australia. *Br J Ophthalmol.* 2006;90:272–275.
- 321 16. Lafuma A, Brézin A, Lopatriello S, et al. Evaluation of non-medical costs associated with  
322 visual impairment in four European countries: France, Italy, Germany and the UK.  
323 *Pharmacoeconomics.* 2006;24:193–205.
- 324 17. World Health Organization. Blindness and vision impairment. Available from:  
325 <https://www.who.int/en/news-room/fact-sheets/detail/blindness-and-visual-impairment>,  
326 accessed 22 February 2019.
- 327 18. Calkins TE, Darrith B, Okroj KT, et al. Utilizing the Time Trade-Off, Standard Gamble,  
328 and Willingness to Pay Utility Measures to Evaluate Health-Related Quality of Life Prior to  
329 Knee or Hip Arthroplasty. *J Arthroplasty.* 2019;34:9-14.

- 1  
2 330 19. Oppe M, Rand-Hendriksen K, Shah K, Ramos-Goñi JM, Luo N. EuroQol Protocols for  
3 331 Time Trade-Off Valuation of Health Outcomes. *Pharmacoeconomics*. 2016;34:993-1004.  
4 332 20. Jan S, Lee SW, Sawhney JP, et al. Catastrophic health expenditure on acute coronary  
5 333 events in Asia: a prospective study. *Bull World Health Organ*. 2016;94:193-200.  
6 334 21. Finger RP, Fenwick E, Chiang PP, et al. The impact of the severity of vision loss on vision-  
7 335 specific functioning in a German outpatient population—an observational study. *Graefes*  
8 336 *Arch Clin Exp Ophthalmol*. 2011;249:1245–1253.  
9 337 22. Zhang M, Song ZJ, Xia HZ, Shen J. Situation analysis of medication among geriatric  
10 338 chronic disease. *Chin J New Drugs Clin Rem*. 2016;35:469-472.  
11 339 23. Su D, Chen YC, Gao HX, et al. Effect of integrated urban and rural residents medical  
12 340 insurance on the utilisation of medical services by residents in China: a propensity score  
13 341 matching with difference-in-differences regression approach. *BMJ Open*. 2019;9:e026408.  
14 342 24. Chen R, Li NX, Liu X. Study on the equity of medical services utilization for elderly  
15 343 enrolled in different basic social medical insurance systems in an underdeveloped city of  
16 344 Southwest China. *Int J Equity Health*. 2018;17:54.  
17 345 25. Dou G, Wang Q, Ying X. Reducing the medical economic burden of health insurance in  
18 346 China: Achievements and challenges. *Biosci Trends*. 2018;12:215-219.  
19 347 26. Brown MM, Brown GC, Stein JD, et al. Age-related macular degeneration: economic  
20 348 burden and value-based medicine analysis. *Can J Ophthalmol*. 2005;40:277-287.  
21 349 27. Wang X, Lamoureux E, Zheng Y, et al. Health burden associated with visual impairment  
22 350 in Singapore: the Singapore epidemiology of eye disease study. *Ophthalmology*.  
23 351 2014;121:1837–1842.  
24 352 28. Ong SY, Cheung CY, Li X, et al. Visual impairment, age-related eye diseases, and  
25 353 cognitive function: the Singapore Malay Eye study. *Arch Ophthalmol*. 2012;130:895–900.  
26 354 29. Brown MM, Brown GC, Sharma S, Landy J. Health care economic analyses and value-  
27 355 based medicine. *Surv Ophthalmol*. 2003;48:204-223.  
28 356 30. Bambara JK, Owsley C, Wadley V, et al. Family caregiver social problem-solving abilities  
29 357 and adjustment to caring for a relative with vision loss. *Invest Ophthalmol Vis Sci*.  
30 358 2009;50:1585-1592.  
31  
32  
33  
34  
35  
36  
37  
38  
39  
40  
41  
42  
43  
44  
45  
46  
47  
48  
49  
50  
51  
52  
53  
54  
55  
56  
57  
58  
59  
60

359 **Table 1** Characteristic of study participants with visual impairment.

| Characteristics             | n (%)      | Outpatient visit | Inpatient visit | Hospital stay per visit (days) | Household income (USD) | CHE            |       | QoL         |       |
|-----------------------------|------------|------------------|-----------------|--------------------------------|------------------------|----------------|-------|-------------|-------|
|                             |            |                  |                 |                                |                        | Proportion (%) | P     | Mean        | P     |
| <b>Total</b>                | <b>298</b> | <b>9.7</b>       | <b>0.6</b>      | <b>2.7</b>                     | <b>13,457.8</b>        | <b>32.2</b>    |       | <b>0.65</b> |       |
| <b>Age</b>                  |            |                  |                 |                                |                        |                |       |             |       |
| 19-50 years old             | 39(13.1)   | 11.4             | 1.1             | 3.5                            | 12,696.0               | 35.9           | 0.574 | 0.74        | 0.000 |
| 51-70 years old             | 125(41.9)  | 10.8             | 0.6             | 2.6                            | 13,452.4               | 34.4           |       | 0.58        |       |
| 71-90 years old             | 134(45.0)  | 8.1              | 0.4             | 2.5                            | 13,684.4               | 29.1           |       | 0.70        |       |
| <b>Gender</b>               |            |                  |                 |                                |                        |                |       |             |       |
| Male                        | 142(47.7)  | 10.7             | 0.6             | 2.7                            | 14,408.2               | 33.8           | 0.576 | 0.66        | 0.689 |
| Female                      | 156(52.3)  | 8.8              | 0.5             | 2.7                            | 12,592.6               | 30.8           |       | 0.65        |       |
| <b>Ethnicity</b>            |            |                  |                 |                                |                        |                |       |             |       |
| Han                         | 278(93.3)  | 9.4              | 0.6             | 2.7                            | 12,788.9               | 30.9           | 0.078 | 0.66        | 0.125 |
| Minority                    | 20(6.7)    | 13.9             | 0.7             | 2.1                            | 22,755.0               | 50.0           |       | 0.54        |       |
| <b>Educational level</b>    |            |                  |                 |                                |                        |                |       |             |       |
| Primary and below           | 71(23.8)   | 9.3              | 0.5             | 1.9                            | 6,945.0                | 39.4           | 0.190 | 0.63        | 0.755 |
| Middle and high school      | 159(53.4)  | 9.9              | 0.6             | 2.7                            | 13,853.7               | 32.1           |       | 0.66        |       |
| College and above           | 68(22.8)   | 9.6              | 0.7             | 3.3                            | 19,332.0               | 25.0           |       | 0.66        |       |
| <b>Occupation</b>           |            |                  |                 |                                |                        |                |       |             |       |
| Management personnel        | 32(10.7)   | 12.1             | 0.8             | 12.0                           | 15,623.8               | 20.7           | 0.107 | 0.73        | 0.865 |
| Professional personnel      | 81(27.2)   | 9.0              | 0.6             | 12.5                           | 16,599.2               | 37.5           |       | 0.65        |       |
| General staff               | 89(29.9)   | 10.1             | 0.6             | 8.0                            | 14,206.2               | 25.9           |       | 0.65        |       |
| Farmer                      | 56(18.8)   | 6.9              | 0.4             | 5.6                            | 4,707.6                | 30.3           |       | 0.65        |       |
| Other professions           | 11(3.7)    | 14.0             | 0.5             | 10.0                           | 28,215.5               | 46.4           |       | 0.58        |       |
| Unemployed                  | 29(9.7)    | 7.7              | 1.0             | 10.9                           | 11,295.3               | 36.4           |       | 0.75        |       |
| <b>Marital status</b>       |            |                  |                 |                                |                        |                |       |             |       |
| Unmarried                   | 44(14.8)   | 5.0              | 0.8             | 2.4                            | 12,740.7               | 25.0           | 0.267 | 0.65        | 0.234 |
| Married                     | 254(85.2)  | 10.5             | 0.5             | 2.7                            | 13,582.0               | 33.5           |       | 0.65        |       |
| <b>Living status</b>        |            |                  |                 |                                |                        |                |       |             |       |
| Alone                       | 16(5.4)    | 7.9              | 0.6             | 5.6                            | 6,304.6                | 50.0           | 0.118 | 0.58        | 0.002 |
| With family                 | 282(94.6)  | 9.8              | 0.6             | 2.5                            | 13,863.6               | 31.2           |       | 0.68        |       |
| <b>Current living place</b> |            |                  |                 |                                |                        |                |       |             |       |
| Urban                       | 214(71.8)  | 9.7              | 0.6             | 2.7                            | 15,792.0               | 26.2           | 0.000 | 0.67        | 0.450 |
| Rural                       | 84(28.2)   | 9.6              | 0.6             | 2.6                            | 7,511.1                | 47.6           |       | 0.62        |       |
| <b>Medical insurance *</b>  |            |                  |                 |                                |                        |                |       |             |       |

| Characteristics                  | n (%)     | Outpatient visit | Inpatient visit | Hospital stay per visit (days) | Household income (USD) | CHE            |       | QoL  |       |
|----------------------------------|-----------|------------------|-----------------|--------------------------------|------------------------|----------------|-------|------|-------|
|                                  |           |                  |                 |                                |                        | Proportion (%) | P     | Mean | P     |
| None                             | 8(2.7)    | 18.1             | 1.4             | 26.2                           | 18,299.2               | 50.0           | 0.008 | 0.64 | 0.003 |
| NCMS                             | 71(23.8)  | 9.8              | 0.6             | 11.3                           | 15,099.4               | 47.9           |       | 0.63 |       |
| URBMI                            | 40(13.4)  | 8.1              | 0.4             | 6.9                            | 11,345.5               | 25.0           |       | 0.81 |       |
| UEBMI                            | 123(41.3) | 10.2             | 0.5             | 4.9                            | 6,333.6                | 30.9           |       | 0.63 |       |
| GMI                              | 42(14.1)  | 7.9              | 0.5             | 15.4                           | 31,936.8               | 16.7           |       | 0.66 |       |
| CMI                              | 14(4.7)   | 5.5              | 1.5             | 30.0                           | 4,249.6                | 21.4           |       | 0.49 |       |
| <b>Visual condition</b>          |           |                  |                 |                                |                        |                |       |      |       |
| Moderate VI                      | 174(58.4) | 9.7              | 0.4             | 1.8                            | 15,021.5               | 28.2           | 0.014 | 0.69 | 0.001 |
| Severe VI                        | 86(28.9)  | 9.6              | 0.7             | 3.5                            | 12,308.5               | 31.4           |       | 0.65 |       |
| Blind                            | 38(12.8)  | 10.0             | 1.2             | 4.7                            | 8,898.5                | 52.6           |       | 0.49 |       |
| <b>VI duration</b>               |           |                  |                 |                                |                        |                |       |      |       |
| 3-6 months                       | 36(12.1)  | 4.6              | 0.4             | 1.3                            | 12,948.3               | 27.8           | 0.804 | 0.58 | 0.066 |
| 6-12 months                      | 48(16.1)  | 7.5              | 0.5             | 2.8                            | 9,755.8                | 31.2           |       | 0.73 |       |
| More than 12 months              | 214(71.8) | 11.1             | 0.6             | 2.9                            | 14,373.8               | 33.2           |       | 0.65 |       |
| <b>Ocular diseases condition</b> |           |                  |                 |                                |                        |                |       |      |       |
| Cataract                         | 80(26.8)  | 4.8              | 0.3             | 4.3                            | 10,898.1               | 17.5           | 0.018 | 0.76 | 0.000 |
| Glaucoma                         | 17(5.7)   | 16.7             | 1.2             | 19.7                           | 17,850.1               | 41.2           |       | 0.64 |       |
| AMD                              | 35(11.7)  | 12.1             | 0.3             | 7.6                            | 12,185.9               | 51.4           |       | 0.72 |       |
| Retinal vascular disease         | 27(9.1)   | 8.9              | 0.9             | 9.4                            | 14,326.4               | 37.0           |       | 0.67 |       |
| Other eye diseases               | 43(14.4)  | 7.9              | 0.6             | 7.7                            | 11,445.6               | 30.2           |       | 0.58 |       |
| Congenital or traumatic          | 17(5.7)   | 15.9             | 0.7             | 4.6                            | 11,677.6               | 35.3           |       | 0.63 |       |
| Complex diseases                 | 759(26.5) | 12.0             | 0.7             | 15.5                           | 16,849.5               | 35.4           |       | 0.56 |       |
| <b>Economic status †</b>         |           |                  |                 |                                |                        |                |       |      |       |
| Lowest                           | 59(19.8)  | 10.0             | 0.6             | 4.7                            | 2,445.9                | 54.2           | 0.001 | 0.59 | 0.559 |
| Lower                            | 59(19.8)  | 7.7              | 0.8             | 12.0                           | 6,464.2                | 33.9           |       | 0.66 |       |
| Middle                           | 60(20.1)  | 8.3              | 0.5             | 9.8                            | 10,890.3               | 26.7           |       | 0.68 |       |
| Higher                           | 60(20.1)  | 14.2             | 0.5             | 5.5                            | 15,481.5               | 21.7           |       | 0.73 |       |
| Highest                          | 60(20.1)  | 8.4              | 0.6             | 15.6                           | 32,134.7               | 25.0           |       | 0.62 |       |

\*New cooperative medical scheme in rural area (NCMS), urban employee basic medical insurance (UEBMI), urban resident basic medical insurance (URBMI), government medical insurance (GMI), and commercial medical insurance (CMI)

† Economic status was divided into five equal intervals based on household income per capita of the study participants. Lowest US\$[60.7,1274.9]; Lower US\$[1365.9, 2428.3]; Middle US\$[2529.5,4097.8]; Higher US\$[4249.6, 6677.9]; Highest US\$[7183.8, 37942.6].



364 **Table 2** Annual direct costs of visual impaired patients in China.

| Characteristics                       | Mean<br>(USD)  | Median<br>(USD) | Max<br>(USD)     | Min<br>(USD) | Proportion<br>(%) |
|---------------------------------------|----------------|-----------------|------------------|--------------|-------------------|
| <b>Direct medical costs</b>           |                |                 |                  |              | <b>70.3</b>       |
| <b>Outpatient costs</b>               |                |                 |                  |              | 69.4              |
| Total                                 | 3,408.5        | 607.1           | 68,296.7         | 0.0          |                   |
| Drug                                  | 2,352.7        | 215.5           | 54,637.3         | 0.0          |                   |
| Out-of-pocket                         | 3,048.5        | 324.8           | 68,296.7         | 0.0          |                   |
| <b>Inpatient costs</b>                |                |                 |                  |              | 27.9              |
| Total                                 | 1,369.5        | 0.0             | 31,871.8         | 0.0          |                   |
| Drug                                  | 408.8          | 0.0             | 12,748.7         | 0.0          |                   |
| Out-of-pocket                         | 1,034.8        | 0.0             | 31,871.8         | 0.0          |                   |
| <b>Self-purchased drugs costs</b>     |                |                 |                  |              | 2.7               |
| Total                                 | 131.8          | 0.0             | 4,553.1          | 0.0          |                   |
| Out-of-pocket                         | 128.3          | 0.0             | 4,553.1          | 0.0          |                   |
| <b>Total direct medical costs</b>     | <b>4,909.8</b> | <b>1,517.7</b>  | <b>70,573.2</b>  | <b>0.0</b>   | <b>100.0</b>      |
| <b>Direct non-medical costs</b>       |                |                 |                  |              | <b>29.7</b>       |
| Long-term home care                   | 1,216.6        | 0.0             | 28,836.4         | 0.0          | 58.5              |
| Transportation                        | 149.8          | 15.2            | 5,463.7          | 0.0          | 7.2               |
| Food or accommodation                 | 176.8          | 0.0             | 9,106.2          | 0.0          | 8.5               |
| Escort                                | 161.1          | 15.2            | 6,677.9          | 0.0          | 7.7               |
| Nutrition or assistive devices        | 277.1          | 0.0             | 4,629.0          | 0.0          | 13.3              |
| Home modifications                    | 97.5           | 0.0             | 6,070.8          | 0.0          | 4.7               |
| <b>Total direct non-medical costs</b> | <b>2,078.8</b> | <b>440.1</b>    | <b>33,237.7</b>  | <b>0.0</b>   | <b>100.0</b>      |
| <b>Total direct costs</b>             | <b>6,988.6</b> | <b>2,281.8</b>  | <b>101,079.1</b> | <b>45.5</b>  | <b>100.0</b>      |

365

366

367 **Appendix 1** The items of the survey questionnaire.

| Variable name                       | Description                                                                                                      |
|-------------------------------------|------------------------------------------------------------------------------------------------------------------|
| <b>Sociodemographic information</b> |                                                                                                                  |
| age                                 | [19,50], [51,70], [71,90]                                                                                        |
| gender                              | Male, Female                                                                                                     |
| ethnicity                           | Han, Minority                                                                                                    |
| educational level                   | Primary and below, Middle and high school, College and above                                                     |
| Occupation *                        | Management personnel, Professional personnel, General staff, Farmer, Other professions, Unemployed               |
| marital status                      | Unmarried, Married                                                                                               |
| living status                       | Alone, With family                                                                                               |
| current living place                | Urban, Rural                                                                                                     |
| medical insurance †                 | GMI, UEBMI, URBMI, NCMS, CMI, None                                                                               |
| personal income                     | Continuous                                                                                                       |
| household size                      | Continuous                                                                                                       |
| household income                    | Continuous                                                                                                       |
| <b>Clinic-related information</b>   |                                                                                                                  |
| Visual condition                    | moderate VI , severe VI , blind                                                                                  |
| VI duration ‡                       | 3-6 months, 6-12 months, More than 12 months                                                                     |
| Ocular diseases condition           | Cataract, Glaucoma, AMD, Retinal vascular disease, Other eye diseases, Congenital or traumatic, Complex diseases |
| Outpatient visit                    | Continuous                                                                                                       |
| Inpatient visit                     | Continuous                                                                                                       |
| Hospital stay per visit             | Continuous                                                                                                       |

**Economic burden****Direct medical costs §**

|                                |            |
|--------------------------------|------------|
| Outpatient costs               | Continuous |
| Outpatient drug costs          | Continuous |
| Outpatient OOP costs           | Continuous |
| Inpatient costs                | Continuous |
| Inpatient drug costs           | Continuous |
| Inpatient OOP costs            | Continuous |
| Self-purchased drugs costs     | Continuous |
| Self-purchased drugs OOP costs | Continuous |

**Direct non-medical costs**

|                                      |            |
|--------------------------------------|------------|
| Long-term home care costs            | Continuous |
| Transportation costs                 | Continuous |
| Food or accommodation costs          | Continuous |
| Escort costs                         | Continuous |
| Nutrition or assistive devices costs | Continuous |
| Home modifications                   | Continuous |

**Quality of life**

Continuous

368 \* Occupation included current profession of unretired participants and former profession for the retired. Professional  
 369 personnel were professional and technical personnel, i.e. teachers, doctors, lawyers, engineer, etc.

370 † Public insurance included new cooperative medical scheme in rural area (NCMS), urban employee basic medical insurance  
 371 (UEBMI), urban resident basic medical insurance (URBMI) and government medical insurance (GMI). Commercial medical  
 372 insurance (CMI) was supplements of public medical insurance purchased by respondents' employers or by themselves.

373 ‡ Duration of VI was defined by the period from the time which the participants became their current visual impaired level.

374 § Direct medical costs measured the cost of resources used for treating a particular illness, consisted of outpatient costs,  
 375 inpatient costs and self-purchased drugs costs. Expenditures for medicine prescribed and purchased during outpatient and  
 376 inpatient visits in hospitals were included in outpatient and inpatient drug costs, respectively. The cost of self-purchased  
 377 drugs was the expense of the drugs that patients bought in pharmacies (not in hospitals) for their ocular disease treatment  
 378 after the initial diagnosis.

379 || Cost of escort were meals, transport and accommodation costs encountered by patients' escorts during all outpatient or  
 380 inpatient visits.

381 **Appendix 2** Annual direct costs of different visual impaired patients in China.

| Characteristics          | Direct medical costs (USD) |                |                      |                | Direct non-medical costs (USD) |                |                       |              |                                |                    |                | Total direct costs (USD) |
|--------------------------|----------------------------|----------------|----------------------|----------------|--------------------------------|----------------|-----------------------|--------------|--------------------------------|--------------------|----------------|--------------------------|
|                          | Outpatient                 | Inpatient      | Self-purchased drugs | Total          | Long-term home care            | Transportation | Food or accommodation | Escort       | Nutrition or assistive devices | Home modifications | Total          |                          |
| <b>Total</b>             | <b>3,408.5</b>             | <b>1,369.5</b> | <b>131.8</b>         | <b>4,909.8</b> | <b>1,216.6</b>                 | <b>149.8</b>   | <b>176.7</b>          | <b>161.1</b> | <b>277.1</b>                   | <b>97.5</b>        | <b>2,078.8</b> | <b>6,988.6</b>           |
| <b>Age</b>               |                            |                |                      |                |                                |                |                       |              |                                |                    |                |                          |
| 19-50 years old          | 2,009.3                    | 3,572.4        | 211.5                | 5,793.2        | 1,269.1                        | 248.1          | 407.7                 | 249.6        | 77.8                           | 43.2               | 2,295.5        | 8,088.7                  |
| 51-70 years old          | 3,479.0                    | 1,062.6        | 156.3                | 4,697.9        | 963.7                          | 161.1          | 216.6                 | 178.5        | 226.3                          | 75.3               | 1,821.6        | 6,519.6                  |
| 71-90 years old          | 3,749.9                    | 1,014.6        | 85.8                 | 4,850.3        | 1,437.2                        | 110.6          | 72.4                  | 119.1        | 382.4                          | 134.0              | 2,255.7        | 7,106.0                  |
| <b>Gender</b>            |                            |                |                      |                |                                |                |                       |              |                                |                    |                |                          |
| Male                     | 3,321.3                    | 1,860.7        | 98.6                 | 5,280.6        | 1,069.2                        | 130.7          | 132.7                 | 179.2        | 300.4                          | 118.4              | 1,930.6        | 7,211.2                  |
| Female                   | 3,487.8                    | 922.4          | 162.0                | 4,572.3        | 1,350.8                        | 167.2          | 216.9                 | 144.6        | 255.8                          | 78.5               | 2,213.8        | 6,786.0                  |
| <b>Ethnicity</b>         |                            |                |                      |                |                                |                |                       |              |                                |                    |                |                          |
| Han                      | 3,404.2                    | 1,325.0        | 130.2                | 4,859.4        | 1,039.7                        | 135.5          | 166.1                 | 167.0        | 250.6                          | 86.5               | 1,845.5        | 6,704.8                  |
| Minority                 | 3,468.1                    | 1,988.2        | 154.7                | 5,611.0        | 3,675.2                        | 348.7          | 324.7                 | 78.2         | 645.0                          | 250.4              | 5,322.3        | 10,933.2                 |
| <b>Educational level</b> |                            |                |                      |                |                                |                |                       |              |                                |                    |                |                          |
| Primary and below        | 2,924.6                    | 991.6          | 85.3                 | 4,001.6        | 2,331.9                        | 173.9          | 138.3                 | 96.1         | 146.7                          | 51.3               | 2,938.2        | 6,939.8                  |
| Middle and high school   | 3,894.0                    | 1,440.2        | 174.5                | 5,508.7        | 887.0                          | 134.9          | 163.0                 | 210.6        | 237.4                          | 117.8              | 1,750.8        | 7,259.6                  |
| College and above        | 2,778.4                    | 1,598.7        | 80.5                 | 4,457.7        | 822.8                          | 159.4          | 248.9                 | 113.2        | 505.8                          | 98.3               | 1,948.5        | 6,406.2                  |
| <b>Occupation</b>        |                            |                |                      |                |                                |                |                       |              |                                |                    |                |                          |
| Management personnel     | 5,325.1                    | 2,859.9        | 131.6                | 8,316.6        | 840.4                          | 125.8          | 115.9                 | 149.4        | 274.8                          | 38.4               | 1,544.7        | 9,861.3                  |
| Professional personnel   | 3,924.7                    | 1,129.7        | 137.3                | 5,191.6        | 1,035.5                        | 182.0          | 281.2                 | 207.9        | 503.9                          | 111.5              | 2,322.1        | 7,513.7                  |
| General staff            | 2,751.8                    | 1,414.9        | 97.5                 | 4,264.1        | 1,592.0                        | 156.1          | 136.3                 | 97.0         | 211.6                          | 109.5              | 2,302.4        | 6,566.5                  |
| Farmer                   | 3,246.6                    | 483.0          | 137.8                | 3,867.3        | 1,036.3                        | 128.3          | 141.2                 | 147.0        | 127.0                          | 32.6               | 1,612.5        | 5,479.8                  |
| Other professions        | 2,467.8                    | 2,635.3        | 146.8                | 5,249.9        | 2,731.9                        | 172.9          | 242.8                 | 226.6        | 531.3                          | 275.9              | 4,181.6        | 9,431.4                  |
| Unemployed               | 2,536.8                    | 1,487.3        | 204.9                | 4,229.1        | 758.8                          | 100.0          | 119.8                 | 242.1        | 40.4                           | 144.4              | 1,405.7        | 5,634.8                  |
| <b>Marital status</b>    |                            |                |                      |                |                                |                |                       |              |                                |                    |                |                          |
| Unmarried                | 869.9                      | 1,715.0        | 172.2                | 2,757.1        | 1,922.0                        | 78.0           | 59.7                  | 71.5         | 120.7                          | 79.4               | 2,331.4        | 5,088.5                  |
| Married                  | 3,848.2                    | 1,309.6        | 124.8                | 5,282.7        | 1,094.4                        | 162.2          | 197.0                 | 176.6        | 304.2                          | 100.6              | 2,035.1        | 7,317.8                  |
| <b>Living status</b>     |                            |                |                      |                |                                |                |                       |              |                                |                    |                |                          |
| Alone                    | 1,546.6                    | 1,218.0        | 138.6                | 2,903.2        | 1,015.9                        | 82.9           | 39.2                  | 126.8        | 158.1                          | 95.8               | 1,518.7        | 4,422.0                  |
| With family              | 3,514.1                    | 1,378.1        | 131.4                | 5,023.6        | 1,228.0                        | 153.6          | 184.6                 | 163.0        | 283.8                          | 97.6               | 2,110.6        | 7,134.3                  |
| <b>Current residence</b> |                            |                |                      |                |                                |                |                       |              |                                |                    |                |                          |
| Urban                    | 3,463.3                    | 1,411.9        | 105.2                | 4,980.5        | 1,347.2                        | 143.6          | 176.7                 | 136.5        | 319.9                          | 111.6              | 2,235.7        | 7,216.1                  |
| Rural                    | 3,268.7                    | 1,261.5        | 199.5                | 4,729.8        | 883.8                          | 165.5          | 176.9                 | 223.8        | 167.8                          | 61.5               | 1,679.8        | 6,409.1                  |

| Characteristics                  | Direct medical costs (USD) |           |                      |         | Direct non-medical costs (USD) |                |                       |        |                                |                    |         | Total direct costs (USD) |
|----------------------------------|----------------------------|-----------|----------------------|---------|--------------------------------|----------------|-----------------------|--------|--------------------------------|--------------------|---------|--------------------------|
|                                  | Outpatient                 | Inpatient | Self-purchased drugs | Total   | Long-term home care            | Transportation | Food or accommodation | Escort | Nutrition or assistive devices | Home modifications | Total   |                          |
| <b>Medical insurance</b>         |                            |           |                      |         |                                |                |                       |        |                                |                    |         |                          |
| None                             | 298.9                      | 4,249.6   | 202.1                | 4,750.5 | 4,078.8                        | 192.6          | 147.0                 | 180.2  | 154.5                          | 151.8              | 4,905.0 | 9,655.5                  |
| NCMS                             | 3,488.4                    | 1,208.2   | 209.3                | 4,905.9 | 881.5                          | 156.2          | 173.2                 | 233.0  | 96.9                           | 42.8               | 1,583.8 | 6,489.6                  |
| URBMI                            | 3,258.8                    | 359.3     | 65.0                 | 3,683.1 | 1,061.2                        | 71.0           | 23.5                  | 86.2   | 103.0                          | 25.0               | 1,370.0 | 5,053.1                  |
| UEBMI                            | 3,351.3                    | 1,658.9   | 123.1                | 5,133.3 | 1,251.4                        | 181.4          | 225.9                 | 115.2  | 326.5                          | 112.1              | 2,212.4 | 7,345.7                  |
| GMI                              | 3,924.8                    | 1,368.5   | 92.1                 | 5,385.3 | 1,585.7                        | 128.4          | 183.4                 | 252.0  | 500.4                          | 195.1              | 2,845.0 | 8,230.3                  |
| CMI                              | 4,160.8                    | 888.9     | 85.7                 | 5,135.4 | 311.7                          | 104.2          | 197.8                 | 130.1  | 653.7                          | 130.1              | 1,527.6 | 6,663.0                  |
| <b>Visual condition</b>          |                            |           |                      |         |                                |                |                       |        |                                |                    |         |                          |
| Moderate VI                      | 3,120.7                    | 853.8     | 118.6                | 4,093.1 | 916.4                          | 142.4          | 138.5                 | 125.9  | 222.0                          | 65.3               | 1,610.4 | 5,703.5                  |
| Severe VI                        | 4,479.9                    | 1,694.5   | 147.5                | 6,321.8 | 1,793.8                        | 158.7          | 226.7                 | 128.2  | 293.3                          | 137.0              | 2,737.6 | 9,059.5                  |
| Blind                            | 2,301.6                    | 2,995.5   | 156.8                | 5,453.9 | 1,284.8                        | 163.9          | 238.9                 | 396.6  | 492.7                          | 155.8              | 2,732.6 | 8,186.5                  |
| <b>VI duration</b>               |                            |           |                      |         |                                |                |                       |        |                                |                    |         |                          |
| 3-6 months                       | 1,574.8                    | 503.8     | 225.0                | 2,303.6 | 1,643.7                        | 103.1          | 89.4                  | 110.6  | 308.8                          | 123.5              | 2,379.2 | 4,682.7                  |
| 6-12 months                      | 2,182.5                    | 1,070.6   | 70.9                 | 3,324.0 | 429.4                          | 152.8          | 282.8                 | 104.2  | 104.5                          | 85.4               | 1,159.1 | 4,483.0                  |
| More than 12 months              | 3,992.0                    | 1,582.2   | 129.8                | 5,703.9 | 1,321.3                        | 157.0          | 167.6                 | 182.4  | 310.4                          | 95.9               | 2,234.6 | 7,938.6                  |
| <b>Ocular diseases condition</b> |                            |           |                      |         |                                |                |                       |        |                                |                    |         |                          |
| Cataract                         | 1,236.9                    | 583.9     | 27.5                 | 1,848.3 | 790.1                          | 55.1           | 67.7                  | 48.4   | 63.2                           | 19.4               | 1,043.7 | 2,892.0                  |
| Glaucoma                         | 4,909.7                    | 2,297.1   | 208.0                | 7,414.8 | 380.0                          | 78.6           | 100.9                 | 102.7  | 118.7                          | 35.7               | 816.6   | 8,231.4                  |
| AMD                              | 8,162.3                    | 524.7     | 134.8                | 8,821.8 | 346.9                          | 189.3          | 172.0                 | 174.6  | 480.9                          | 0.0                | 1,363.7 | 10,185.5                 |
| Retinal vascular disease         | 4,151.1                    | 2,270.9   | 249.9                | 6,671.9 | 930.5                          | 139.1          | 84.9                  | 141.1  | 237.9                          | 194.2              | 1,727.8 | 8,399.7                  |
| Other eye diseases               | 1,392.9                    | 2,191.8   | 185.5                | 3,770.2 | 2,309.9                        | 331.9          | 486.5                 | 149.8  | 175.0                          | 28.6               | 3,461.8 | 7,232.0                  |
| Congenital or traumatic          | 2,324.4                    | 2,750.6   | 166.8                | 5,241.7 | 444.2                          | 192.2          | 232.7                 | 337.4  | 70.1                           | 197.3              | 1,473.9 | 6,715.7                  |
| Complex diseases                 | 4,255.0                    | 1,286.8   | 142.7                | 5,684.5 | 1,882.8                        | 149.8          | 156.4                 | 256.8  | 550.9                          | 216.2              | 3,212.9 | 8,897.5                  |
| <b>Economic status</b>           |                            |           |                      |         |                                |                |                       |        |                                |                    |         |                          |
| Lowest                           | 3,662.3                    | 1,342.8   | 177.1                | 5,182.2 | 1,523.5                        | 254.6          | 315.7                 | 294.5  | 173.4                          | 36.0               | 2,597.8 | 7,780.0                  |
| Lower                            | 1,996.4                    | 1,738.2   | 95.0                 | 3,829.6 | 479.0                          | 174.2          | 295.0                 | 158.1  | 200.8                          | 54.9               | 1,362.1 | 5,191.7                  |
| Middle                           | 2,614.7                    | 1,345.7   | 142.5                | 4,102.9 | 1,196.1                        | 94.0           | 37.3                  | 77.9   | 220.6                          | 76.1               | 1,702.0 | 5,804.9                  |
| Higher                           | 4,761.2                    | 934.9     | 114.9                | 5,811.0 | 800.9                          | 84.0           | 49.2                  | 108.5  | 250.0                          | 5.0                | 1,297.7 | 7,108.7                  |
| Highest                          | 3,988.4                    | 1,491.6   | 129.7                | 5,609.8 | 2076.3                         | 144.4          | 190.8                 | 168.6  | 537.5                          | 313.7              | 3,431.3 | 9,041.1                  |

STROBE Statement—Checklist of items that should be included in reports of *cross-sectional studies*

|                           | Item No | Recommendation                                                                                                                                                                                               | Page No |
|---------------------------|---------|--------------------------------------------------------------------------------------------------------------------------------------------------------------------------------------------------------------|---------|
| <b>Title and abstract</b> | 1       | (a) Indicate the study's design with a commonly used term in the title or the abstract                                                                                                                       | 1       |
|                           |         | (b) Provide in the abstract an informative and balanced summary of what was done and what was found                                                                                                          | 2       |
| <b>Introduction</b>       |         |                                                                                                                                                                                                              |         |
| Background/rationale      | 2       | Explain the scientific background and rationale for the investigation being reported                                                                                                                         | 4       |
| Objectives                | 3       | State specific objectives, including any prespecified hypotheses                                                                                                                                             | 4       |
| <b>Methods</b>            |         |                                                                                                                                                                                                              |         |
| Study design              | 4       | Present key elements of study design early in the paper                                                                                                                                                      | 4       |
| Setting                   | 5       | Describe the setting, locations, and relevant dates, including periods of recruitment, exposure, follow-up, and data collection                                                                              | 5       |
| Participants              | 6       | (a) Give the eligibility criteria, and the sources and methods of selection of participants                                                                                                                  | 5       |
| Variables                 | 7       | Clearly define all outcomes, exposures, predictors, potential confounders, and effect modifiers. Give diagnostic criteria, if applicable                                                                     | 6       |
| Data sources/measurement  | 8*      | For each variable of interest, give sources of data and details of methods of assessment (measurement). Describe comparability of assessment methods if there is more than one group                         | 6       |
| Bias                      | 9       | Describe any efforts to address potential sources of bias                                                                                                                                                    | 5       |
| Study size                | 10      | Explain how the study size was arrived at                                                                                                                                                                    |         |
| Quantitative variables    | 11      | Explain how quantitative variables were handled in the analyses. If applicable, describe which groupings were chosen and why                                                                                 | 6       |
| Statistical methods       | 12      | (a) Describe all statistical methods, including those used to control for confounding                                                                                                                        | 6       |
|                           |         | (b) Describe any methods used to examine subgroups and interactions                                                                                                                                          | 6       |
|                           |         | (c) Explain how missing data were addressed                                                                                                                                                                  |         |
|                           |         | (d) If applicable, describe analytical methods taking account of sampling strategy                                                                                                                           |         |
|                           |         | (e) Describe any sensitivity analyses                                                                                                                                                                        |         |
| <b>Results</b>            |         |                                                                                                                                                                                                              |         |
| Participants              | 13*     | (a) Report numbers of individuals at each stage of study—eg numbers potentially eligible, examined for eligibility, confirmed eligible, included in the study, completing follow-up, and analysed            | 6       |
|                           |         | (b) Give reasons for non-participation at each stage                                                                                                                                                         | 6       |
|                           |         | (c) Consider use of a flow diagram                                                                                                                                                                           |         |
| Descriptive data          | 14*     | (a) Give characteristics of study participants (eg demographic, clinical, social) and information on exposures and potential confounders                                                                     | 7       |
|                           |         | (b) Indicate number of participants with missing data for each variable of interest                                                                                                                          |         |
| Outcome data              | 15*     | Report numbers of outcome events or summary measures                                                                                                                                                         | 7-8     |
| Main results              | 16      | (a) Give unadjusted estimates and, if applicable, confounder-adjusted estimates and their precision (eg, 95% confidence interval). Make clear which confounders were adjusted for and why they were included |         |

|                          |    |                                                                                                                                                                            |       |
|--------------------------|----|----------------------------------------------------------------------------------------------------------------------------------------------------------------------------|-------|
|                          |    | (b) Report category boundaries when continuous variables were categorized                                                                                                  | 13-14 |
|                          |    | (c) If relevant, consider translating estimates of relative risk into absolute risk for a meaningful time period                                                           |       |
| Other analyses           | 17 | Report other analyses done—eg analyses of subgroups and interactions, and sensitivity analyses                                                                             | 15-16 |
| <b>Discussion</b>        |    |                                                                                                                                                                            |       |
| Key results              | 18 | Summarise key results with reference to study objectives                                                                                                                   | 8     |
| Limitations              | 19 | Discuss limitations of the study, taking into account sources of potential bias or imprecision. Discuss both direction and magnitude of any potential bias                 | 9     |
| Interpretation           | 20 | Give a cautious overall interpretation of results considering objectives, limitations, multiplicity of analyses, results from similar studies, and other relevant evidence | 8-9   |
| Generalisability         | 21 | Discuss the generalisability (external validity) of the study results                                                                                                      |       |
| <b>Other information</b> |    |                                                                                                                                                                            |       |
| Funding                  | 22 | Give the source of funding and the role of the funders for the present study and, if applicable, for the original study on which the present article is based              | 10    |

\*Give information separately for exposed and unexposed groups.

**Note:** An Explanation and Elaboration article discusses each checklist item and gives methodological background and published examples of transparent reporting. The STROBE checklist is best used in conjunction with this article (freely available on the Web sites of PLoS Medicine at <http://www.plosmedicine.org/>, Annals of Internal Medicine at <http://www.annals.org/>, and Epidemiology at <http://www.epidem.com/>). Information on the STROBE Initiative is available at [www.strobe-statement.org](http://www.strobe-statement.org).

# BMJ Open

## Burden of visual impairment associated with eye diseases: an exploratory survey of 298 Chinese patients

|                                 |                                                                                                                                                                                                                                                                                                                                                                                                                                                                                                                                                                                                                                                                               |
|---------------------------------|-------------------------------------------------------------------------------------------------------------------------------------------------------------------------------------------------------------------------------------------------------------------------------------------------------------------------------------------------------------------------------------------------------------------------------------------------------------------------------------------------------------------------------------------------------------------------------------------------------------------------------------------------------------------------------|
| Journal:                        | <i>BMJ Open</i>                                                                                                                                                                                                                                                                                                                                                                                                                                                                                                                                                                                                                                                               |
| Manuscript ID                   | bmjopen-2019-030561.R1                                                                                                                                                                                                                                                                                                                                                                                                                                                                                                                                                                                                                                                        |
| Article Type:                   | Original research                                                                                                                                                                                                                                                                                                                                                                                                                                                                                                                                                                                                                                                             |
| Date Submitted by the Author:   | 10-Jul-2019                                                                                                                                                                                                                                                                                                                                                                                                                                                                                                                                                                                                                                                                   |
| Complete List of Authors:       | Guan, Xiaodong; Peking University, Department of Pharmacy Administration and Clinical Pharmacy<br>Fu, Mengyuan; Peking University, Department of Pharmacy Administration and Clinical Pharmacy<br>Lin, Fanghui; Peking University, International Research Center for Medicinal Administration<br>Zhu, Dawei; Chinese Academy of Medical Sciences and Peking Union Medical College, Center for Health Policy and Management, Institute of Medical Information & Library<br>Vuillermin, Daniel; Peking University, School of Health Humanities<br>Shi, Luwen; School of Pharmaceutical Sciences, Peking University, Department of Pharmacy Administration and Clinical Pharmacy |
| <b>Primary Subject Heading</b>: | Health economics                                                                                                                                                                                                                                                                                                                                                                                                                                                                                                                                                                                                                                                              |
| Secondary Subject Heading:      | Public health, Ophthalmology                                                                                                                                                                                                                                                                                                                                                                                                                                                                                                                                                                                                                                                  |
| Keywords:                       | economic burden, catastrophic healthcare expenditure, quality of life, visual impairment                                                                                                                                                                                                                                                                                                                                                                                                                                                                                                                                                                                      |
|                                 |                                                                                                                                                                                                                                                                                                                                                                                                                                                                                                                                                                                                                                                                               |

SCHOLARONE™  
Manuscripts

1  
2 **1 Burden of visual impairment associated with eye diseases: an exploratory**  
3  
4 **2 survey of 298 Chinese patients**  
5

6 3

7 4 Xiaodong Guan,<sup>1,2</sup> Mengyuan Fu,<sup>1</sup> Fanghui Lin,<sup>2</sup> Dawei Zhu,<sup>2,3</sup> Daniel Vuillermin,<sup>4</sup> and Luwen  
8 5 Shi <sup>1,2\*</sup>  
9

10 6

11  
12 7 <sup>1</sup> School of Pharmaceutical Sciences, Peking University, Beijing, China; <sup>2</sup> International  
13 8 Research Center for Medicinal Administration, Peking University, Beijing, China; <sup>3</sup> China  
14 9 Center for Health Development Studies, Peking University, Beijing, China; <sup>4</sup> School of Health  
15 10 Humanities, Peking University, Beijing, China  
16  
17

18 11

19  
20  
21 12 \* **Corresponding author.** Department of Pharmacy Administration and Clinical Pharmacy,  
22 13 School of Pharmaceutical Sciences, Peking University, 38 Xueyuan Road, Haidian District,  
23 14 Beijing, 100191, China. Tel & Fax: 86-10-82805019. E-mail: [shiluwen211@163.com](mailto:shiluwen211@163.com)  
24  
25

26 15

27  
28 16 **Keywords:** economic burden, catastrophic healthcare expenditure, quality of life, visual  
29 17 impairment  
30

31 18

32 19

33  
34  
35 20 **Word count:** 3,175  
36  
37  
38  
39  
40  
41  
42  
43  
44  
45  
46  
47  
48  
49  
50  
51  
52  
53  
54  
55  
56  
57  
58  
59  
60



1  
2 **Abstract**

3  
4 **Objectives** To explore the economic burden, prevalence of catastrophic healthcare  
5  
6  
7  
8 expenditure (CHE) and the quality of life (QoL) of Chinese patients with visual impairment  
9  
10 (VI) associated with eye diseases.

11  
12 **Design** A questionnaire survey from March to May 2016 by structured face-to-face interviews  
13  
14 of patients with VI.

15  
16 **Participants** 302 patients who were diagnosed with moderate VI or worse in both eyes  
17  
18 (VA<6/18) were included and 298 patients (98.7%) completed the survey questionnaires were  
19  
20 eligible for the study.

21  
22 **Outcome measures** The economic burden was estimated by calculating participants' direct  
23  
24 costs covered in 2015 and the definition of CHE was out-of-pocket costs exceeding 30% of  
25  
26 annual household income. QoL was weighed by health utility value using time-trade-off  
27  
28 valuation techniques.

29  
30 **Results** Annual average direct costs per patient caused by VI were US\$6988.6±10834.3 and  
31  
32 70.3% were direct medical costs of which only 26.9% were reimbursable by medical  
33  
34 insurance. 32.2% of households suffered from CHE, in particular, less wealthy patients with  
35  
36 VI living in rural areas and without medical insurance. The health utility value was rated at  
37  
38 0.65 on average and VI patients aged 51-57, living alone and insured by commercial medical  
39  
40 insurance had relatively less QoL.

41  
42 **Conclusion** Our study explored the economic burden and QoL of visual impairment  
43  
44 associated with patients with eye diseases in China, indicating a substantial economic burden  
45  
46 and poor quality of life. Preferential medical insurance policies should be designed in relation  
47  
48 to people with VI to further reduce the health inequalities, avoid CHE and promote QoL.  
49  
50  
51  
52  
53  
54  
55  
56  
57  
58  
59  
60

1  
2 45 **Article Summary**

3  
4 46 **Strengths and limitations of this study**

5 47 1. To our knowledge, this is the first study to explore the prevalence of CHE and QoL of  
6 Chinese patients with VI associated with eye diseases.

7 48  
8 49 2. The face-to-face interviews were conducted in two tertiary general hospitals in Beijing,  
9 which might result in potential sample selection bias.

10 50  
11 51 3. There could have been recall bias because the data were self-reported by the patients.  
12  
13  
14  
15  
16  
17  
18  
19  
20  
21  
22  
23  
24  
25  
26  
27  
28  
29  
30  
31  
32  
33  
34  
35  
36  
37  
38  
39  
40  
41  
42  
43  
44  
45  
46  
47  
48  
49  
50  
51  
52  
53  
54  
55  
56  
57  
58  
59  
60

For peer review only

## 54 INTRODUCTION

55 With a large rapidly-aging population in mainland China, visual impairment (VI) is  
56 emerging as a significant public health concern [1]. According to the World Health Survey  
57 (2003), one in five adults reported some degree of far visual difficulty [2]. In 2015, the number  
58 of people with moderate VI or worse was estimated to be 253 million globally [3]. More than  
59 80% of the global total of VI occurs in developing countries [4], and 26.5% of the total of VI  
60 occurs in China [5]. The prevalence of VI in China is 0.94% yet, for the people older than 50,  
61 this figure rises to 5.8%. In Tibet, one of the highest and harshest human habitations on earth,  
62 the prevalence is 13.2% [6-8].

63 The main impact of VI is a diminished ability to perform daily activities, which often results  
64 in high health expenditures and the loss of independence [9]. The total financial cost of VI  
65 worldwide was estimated to be \$3 trillion in 2010 or \$4,030 per person who is visually  
66 impaired [10]. In addition to the economic burden, VI also has extensive social ramifications in  
67 terms of participation in society, employment and quality of life (QoL). The World Health  
68 Organization (WHO) estimated that 1% of the total global burden of disease measured as  
69 Disability-Adjusted Life Years (DALY) attributable to VI increased by 47% from 12.9  
70 million DALYs in 1990 to 18.8 million DALYs in 2010 [11, 12].

71 The burden of VI has been well researched in countries such as the United States, Australia  
72 and some European countries [12-14]. However, little is known about the economic burden and  
73 QoL of patients with VI associated with eye diseases in China. Therefore, we undertook an  
74 explanatory survey to: quantify the economic burden; identify the prevalence of catastrophic  
75 healthcare expenditure (CHE); and describe the QoL of Chinese patients with VI associated  
76 with ocular diseases. The results will provide primary information for policy-makers when  
77 allocating limited public insurance financial resources in mainland China.

## 79 METHODS

### 80 Questionnaire design

81 We conducted a questionnaire survey by structured face-to-face interviews of patients with  
82 VI. The study questionnaire included standardized items developed by reviewing related  
83 research as well as items developed by consulting ophthalmologists and pharmacists. The  
84 survey questionnaire included four parts: 1. sociodemographic information; 2. clinic-related  
85 information; 3. economic burden; 4. Quality of life.

#### 86 *Sociodemographic information*

87 Age, gender, ethnicity, educational level, occupation, marital status, living status, current  
88 living place, medical insurance, personal income, household size and household income were

1  
2 89 included.

3  
4 90 ***Clinic-related information***

5 91 Healthcare service utilization, treatment history and level of visual impairment were  
6 92 included. The level of VI was divided into three categories based on the WHO visual acuity  
7 93 (VA) categorization principles: 1. moderate VI ( $6/60 < VA < 6/18$ ); 2. severe VI  
8 94 ( $3/60 < VA < 6/60$ ); 3. Total blindness ( $VA < 3/60$ )<sup>[15]</sup>. Causes of VI were noted using standard  
9 95 WHO methodology for surveys on VI<sup>[16]</sup>.

10  
11  
12  
13  
14 96 ***Economic burden***

15 97 Economic burden was estimated by calculating participants' direct costs related to the  
16 98 diagnosis, treatment and follow up care of eye diseases leading to VI and the expenses related  
17 99 to the vision loss/inability to see in the year 2015. Direct costs included direct medical costs,  
20 100 which were further divided into insurance covered and out-of-pocket parts, and direct non-  
21 101 medical costs.

22  
23  
24 102 ***Quality of life***

25 103 The time trade-off (TTO) valuation technique is a commonly used QoL measurement,  
26 104 which is understood by the majority of patients and shows good reproducibility<sup>[17]</sup>. In our  
27 105 study, TTO determined the length of lifetime the respondent would be willing to forego to  
28 106 live in perfect health by asking, "Assuming you will only live for 10 years, what is the  
29 107 maximum amount of that time, if any, you would be willing to trade for a return to permanent  
30 108 perfect vision (1.0) during the years that remain?"<sup>[18]</sup>

31 109 The questionnaire was designed and optimized by ophthalmologists and clinical  
32 110 pharmacists in Beijing, China. After conducting a pilot field research study in a tertiary  
33 111 hospital in Beijing, all of the experts agreed that the questionnaire was valid. The items and  
34 112 descriptions of survey questionnaire were shown in **Appendix 1**.

35 113

36  
37 114 **Recruitment and sampling**

38 115 Two tertiary hospitals in Beijing were recruited based on the volume of ocular outpatient  
39 116 visits using convenience sampling methods. Participants were eligible for inclusion in the  
40 117 study if they were diagnosed with moderate VI or worse in both eyes ( $VA < 6/18$ ) and were  
41 118 physically and mentally able to participate in the survey and agreed to participate in the study.  
42 119 We excluded participants who were pregnant, had a concomitant malignant disease or an  
43 120 inability to complete the questionnaire. Given the time required for each face-to-face  
44 121 interview and the volume of VI patient visits in the both sample hospitals per day, we aimed  
45 122 to collect data from approximately 300 patients.

46  
47  
48  
49  
50  
51  
52  
53  
54  
55  
56  
57  
58  
59  
60 123

## 124 **Data collection and quality control**

125 A questionnaire survey was conducted from March to May 2016 by structured face-to-face  
126 interviews of outpatients admitted in ophthalmic department in Peking University Third  
127 Hospital and Beijing Hospital. These two hospitals accept most ocular outpatient visits in  
128 Beijing. All of the investigators were trained for standard processes via a workshop before  
129 implementation of the survey to minimize performance bias. In order to control ascertainment  
130 bias, the investigators read all the contents of the questionnaire during the face-to-face  
131 interviews to establish that patients with VI could hear and understand the questions. The  
132 interviews lasted approximately 0.5-1 hours to collect detailed information. The researchers  
133 emphasized to participants that only vision-related costs were to be included after reading  
134 through every question in the economic burden section to ensure accurate recording of  
135 economic burden. Survey data were recorded on paper forms and translated using Epidata3.1.  
136 All patients were de-identified into a unique project sequence number during data analysis to  
137 ensure anonymity and control analysis bias.

## 139 **Outcome measures**

### 140 *Catastrophic healthcare expenditure*

141 CHE was defined as out-of-pocket (OOP) for healthcare over a year that exceeded a certain  
142 proportion of a household's income. This threshold had been defined in many ways. One of  
143 the most common definitions was OOP costs exceeding 30% of annual household income<sup>[19]</sup>.

### 144 *Quality of life*

145 Answers to the time trade-off questions were converted to utility value.

$$146 Z = (10 - N) / 10$$

147 Z was the health utility value; N was the number of years that the respondents were willing  
148 to trade for a return to permanent perfect vision. Utility values were anchored on a scale  
149 between 0 (the preference for death rather than living in the patient's current state of health)  
150 and 1 (a perception of perfect health)<sup>[17]</sup>.

## 152 **Statistical analysis**

153 Costs and income were assessed in Chinese Yuan (CNY) and converted into United States  
154 dollars (USD) uniformly based on exchange rates on June 1, 2016 (1 USD=6.5889 CNY) to  
155 make the results more comparable to other published studies.

156 STATA 14.0 was applied to conduct the following statistical analysis: 1. descriptive  
157 analysis of the participants' demographic information, healthcare service utilization,  
158 insurance reimbursement rate, expenditures, CHE prevalence and QoL; 2. bivariate chi-square

1  
2 159 test on the difference of CHE prevalence and QoL value between subgroups. The level of  
3  
4 160 statistical significance was  $p < 0.05$  (two-sided).

5 161

## 6 162 **Ethics Statement**

7  
8  
9 163 Ethics committee approval obtained from Peking University Institution Review Board (No.  
10 164 IRB00001052-16003). All participants were informed by an information sheet and have  
11  
12 165 signed the declaration of consent to participate in the study.

13  
14 166

## 15 167 **Patient and public involvement**

16  
17 168 There were no patients and public involved in the development of the research  
18  
19 169 questionnaire, the outcome measures, the design, recruitment and implementation of the study.  
20  
21 170 The results will be disseminated through scientific journals.

22  
23 171

## 24 172 **RESULTS**

### 25 173 **Description of demographic characteristics**

26  
27 174 A total of 302 patients were included and 298 completed questionnaires were eligible for  
28  
29 175 this study, yielding a response rate of 98.7%. Patients' demographic data are shown in **Table**  
30  
31 176 **1**. The mean age in sample was 65.4 and there were slightly fewer males (47.7%). Most of the  
32  
33 177 participants were married (85.2%), living with family (94.6%) and in urban areas (71.8%).  
34  
35 178 41.3% of the participants were covered by Urban Employee Basic Medical Insurance  
36  
37 179 (UEBMI), 23.8% by New Cooperative Medical Scheme (NCMS), 14.1% by Government  
38  
39 180 Medical Insurance (GMI), and 13.4% by Urban Resident Basic Medical Insurance (URBMI).

40 181 Of the visual-related health conditions reported, 58.4% had moderate VI, 28.9% had severe  
41  
42 182 VI, and 12.8% were blind. 71.8% of the participants had been suffered from VI for more than  
43  
44 183 one year. 26.8%, 11.7% and 9.1% of the participants' VI were caused by cataract, AMD and  
45  
46 184 vascular retinopathy separately, while 26.5% by multiple ocular diseases. The annual  
47  
48 185 personnel income and household income of the participants were US\$6,266.4±10,403.2 and  
49  
50 186 US\$13,457.8±16,711.9, respectively.

51 187

### 52 188 **Healthcare service utilization**

53  
54 189 As shown in **Table 1**, the average number of healthcare service utilization due to VI within  
55  
56 190 1 year was 9.7 outpatient visits, ranging from 4.8 visits (cataract) to 16.7 visits (glaucoma).  
57  
58 191 Average number and length of inpatient hospital visits were 0.6 visit within 1 year and 2.7  
59  
60 192 days of hospital staying per visit.

193

## 194 **Direct costs**

195 The total direct medical costs were US\$6,988.6±10,834.3 in 2015, including direct medical  
196 costs of US\$4,909.8±8,981.7 (70.3%) and direct non-medical costs of US\$2,078.8±4,430.6  
197 (29.7%).

198 As shown in **Table 2**, of the direct medical costs, outpatient fees represented the largest  
199 costs at US\$3,408.5 (69.4%), followed by inpatient costs at US\$1,369.5 (27.9%). Except  
200 outpatient and inpatient costs, the participants also purchased drugs by themselves in retail  
201 pharmacies (2.7%). Only 10.6% of the outpatient costs, 24.4% of the inpatient costs and 2.6%  
202 of the self-purchased drug costs were covered by the medical insurance. Average total OOP  
203 costs per patient were US\$4211.6 (85.8%).

204 Direct non-medical costs occurred mostly due to long-term home care at US\$1,216.6  
205 (58.5%). Nutrition or assistive devices, food and accommodation, escort, transportation, and  
206 home modifications costs accounted for 13.3%, 8.5%, 7.7%, 7.2% and 4.7% respectively.

207 The specific costs among different groups were shown in the **Appendix 2**.

## 209 **Insurance reimbursement rate**

210 As shown in **Table 3**, 28.1%, 9.5%, 2.7% and 26.9% of the outpatient, inpatient, self-  
211 purchased drugs and total direct medical costs caused by VI were reimbursable. However, the  
212 reimbursement rate decreased with the severity of VI (moderate VI 28.1%, severe VI 27.0%,  
213 blind 21.4%) and increased with patient's economic status (lowest 15.0%, lower 25.4%,  
214 middle 28.7%, higher 31.7% and highest 39.3%). Rural patients received a lower  
215 reimbursement rate (13.9%) as most of their medical insurance scheme was NCMS which has  
216 much lower reimbursement rate than other insurance schemes. The reimbursement rate of  
217 different diseases ranged from AMD (23.9%) and glaucoma (24.8%) to cataract (26.7%) and  
218 multiple ocular diseases (32.1%).

## 220 **Prevalence of CHE**

221 Patients with VI paid in direct medical costs an average amount equal to 111.5% of their  
222 individual annual income and 51.9% of their household's annual income. As shown in **Table**  
223 **3**, 32.2% households suffered from CHE caused by VI. The prevalence of CHE was generally  
224 correlated with the severity of VI (moderate VI 28.2%, severe VI 31.4%, blind 52.6%;  $p<0.05$ ).  
225 Patients living in rural areas generally had greater risk of CHE compared with urban residents  
226 (47.6%, 26.2%;  $p<0.001$ ). Of all of the different types of medical insurances, the CHE  
227 prevalence of patients without medical insurance and insured by NCMS ostensibly  
228 outweighed those insured by GMI and CMI (none 50.0%, NCMS 47.9%, GMI 16.7%, CMI



229 21.4%;  $p<0.01$ ). In relation to the patients' economic status, the less wealthy patients (those  
230 with lower or the lowest economic status) were much more likely to encounter CHE than  
231 wealthier patients ( $p<0.01$ ). Patients with AMD (51.4%) and glaucoma (24.8%) had much  
232 higher risk of CHE than those with cataract (17.5%,  $p=0.01$ ).

### 234 QoL

235 As shown in **Table 3**, the value of QoL was 0.65 on average and correlated with the severity  
236 of VI (moderate VI 0.69, severe VI 0.65, blind 0.49;  $p<0.01$ ). Middle-aged patients (51-70)  
237 had the poorest life quality (0.58;  $p<0.001$ ) and patients living alone had relatively poorer  
238 QoL than living with family (0.58, 0.68;  $p<0.01$ ). Of all of the different types of medical  
239 insurances, the health utility values of patients insured by CMI were significantly lower than  
240 those insured by URBMI (0.49, 0.81;  $p<0.01$ ). Patients with multiple ocular diseases (0.56)  
241 had relatively poorer QoL than those with cataract (0.76) and AMD (0.72,  $p<0.001$ ).

### 243 DISCUSSION

244 This study provided primary information for the economic burden and QoL of Chinese  
245 patients with VI associated with ocular diseases, indicating a substantial burden of VI, with  
246 considerable variation among the different level of VI, type of medical insurance and  
247 economic status.

248 In our study, annual direct medical costs per VI patient associated with ocular disease were  
249 US\$4,093.1 for moderate VI, US\$6,321.8 for severe VI and US\$5,453.9 for blindness, which  
250 were much lower than several previous studies in the US, which reported mean annual direct  
251 medical expenses per patient to be US\$12,175-14,029 for moderate VI, US\$13,154-16,321  
252 for severe VI and US\$14,882-24,180 for blindness<sup>[12]</sup>. This was understandable as the gross  
253 domestic product per capita of China was much lower than the United States in 2015 (China  
254 (US\$8,033.4), US (US\$56,803.5))<sup>[20]</sup>. Direct medical costs occurred mostly due to outpatient  
255 visits, which was inconsistent with formal findings in the United States and Australia that  
256 direct medical costs occurred mostly due to hospitalization<sup>[12]</sup>. As for different diseases, AMD  
257 and glaucoma reported highest average annual direct medical costs in our study (US\$8,821.8,  
258 US\$7,414.8), which were higher than studies of AMD in Thailand (US\$3,604),<sup>[21]</sup> and  
259 glaucoma in Germany (€814-€1195), UK (€457-1065), France (€313-€1002) and Italy (€153-  
260 €791).<sup>[14,22]</sup> Previous studies demonstrated that even mild visual impairment had a significant  
261 and independent impact on vision-specific functioning<sup>[23]</sup> and diminished ability to perform  
262 activities of daily living alone, which led to long-term care for patients. Therefore, it was not  
263 surprising that the highest direct non-medical costs came from long-term home care (58.5%).



1  
2 264 A possible explanation for high nutrition or assistive devices costs (13.3%) in our study was  
3  
4 265 that people in China were keen on buying nutrition or devices that usually advertised in the  
5  
6 266 media,<sup>[24]</sup> especially those visually impaired patients who rarely went out and had no other  
7  
8 267 choices but to listen to TV for entertainment.

9 268 Our research showed that Chinese patients with VI had a relatively-high financial burden,  
10  
11 269 resulting in 32.2% households suffered from CHE. Patients with VI paid in direct costs an  
12  
13 270 average amount equal to 111.5% of their individual annual income and 51.9% of their  
14  
15 271 household's annual income, which indicated that the patients themselves are clearly unable to  
16  
17 272 meet such substantial costs and the exorbitant burden was too costly for even the entire  
18  
19 273 household to maintain. In particular, for households that have a lower economic status, the  
20  
21 274 discrepancy between costs and income was greater, which made them more vulnerable facing  
22  
23 275 the CHE. Medical insurance plays a vital role in preventing patients from CHE by assisting  
24  
25 276 to cover patients' medical expenses. However, our results showed that the average insurance  
26  
27 277 reimbursement rate of Chinese VI patients was low (26.9%), and varied greatly between  
28  
29 278 different insurance schemes. Patients without medical insurance recorded the highest CHE  
30  
31 279 prevalence and patients insured by NCMS, with the relatively lowest reimbursement rate <sup>[25]</sup>,  
32  
33 280 had substantially higher CHE prevalence than those with the highest reimbursement rate (GMI  
34  
35 281 and CMI). Patients living in rural areas, who usually had a relatively low economic status and  
36  
37 282 were insured by NCMS <sup>[26]</sup> were ostensibly at greater risk of CHE. This was the result of the  
38  
39 283 "urban-rural dual structure" of medical insurance system in China, <sup>[27]</sup> which showed a  
40  
41 284 significant difference in coverage reimbursement scope, payment level, funding level, etc.<sup>[28]</sup>  
42  
43 285 Besides, our study found that higher severity level of VI caused higher direct costs, but  
44  
45 286 received a lower reimbursement rate, which resulted in dramatically increased risk of CHE  
46  
47 287 with the severity of VI. Furthermore, patients with AMD and glaucoma with a relatively low  
48  
49 288 reimbursement rate had a heavier economic burden and were more likely to incur catastrophic  
50  
51 289 spending. This result may largely due to the high price of AMD treatment therapy, <sup>[29]</sup> which  
52  
53 290 also explain the highest fraction of outpatient costs of AMD patients and limited drug covered  
54  
55 291 by medical insurance. This situation was alleviated after the national pricing negotiations on  
56  
57 292 two innovative but expensive medicines (Razumab and Conbercept) in 2017, which  
58  
59 293 eventually reached an average price discount of 18.74% by the pharmaceutical companies and  
60  
294 70% public medical insurance reimbursement rate by Chinese government. <sup>[30]</sup> Recommended  
295 management of glaucoma which requires regular attendance of follow-up clinic visits <sup>[31]</sup> may  
296 explain the highest number of outpatient visit, inpatient visit, the longest stay per inpatient  
297 visit as well as the high costs.

298 In addition to the economic burden posed by VI, our study also suggested that VI had a

1  
2 299 substantial negative effect on health-related QoL. Moreover, the life quality of patients with  
3  
4 300 VI (0.65) in our study was worse than patients with cancer (0.92), mild stroke (0.9), gout  
5  
6 301 (0.86), heart failure (0.78) and HIV/AIDS (0.70)<sup>[32]</sup>. This may largely due to the significant  
7  
8 302 association between VI and mental stress such as anxiety,<sup>[33]</sup> depression<sup>[9]</sup> and cognitive  
9  
10 303 functions.<sup>[34]</sup> Among the study population, the utility value decreased dramatically with  
11  
12 304 perceived total loss of vision, which was consistent with a study in rural Africa<sup>[35]</sup>. Previous  
13  
14 305 studies have suggested that the utility values most highly correlated with the visual acuity in  
15  
16 306 the better seeing eye, and as the vision in the better seeing eye decreased, the corresponding  
17  
18 307 utility value decreased.<sup>[36]</sup> Patients with cataract reported the highest TTO utility value (0.76)  
19  
20 308 than those with other diseases especially multi ocular diseases (0.56). One of the reasons for  
21  
22 309 this is that cataract can be effectively treated by surgery, which is a disability-preventing and  
23  
24 310 highly cost-effective intervention,<sup>[37]</sup> and patients' TTO utility value could improve  
25  
26 311 significantly after cataract surgery.<sup>[38]</sup> Besides, living with family could slightly enhance the  
27  
28 312 life quality rather than living alone because family members were often called on to provide  
29  
30 313 physical and emotional support.<sup>[39]</sup> However, unlike CHE, the life quality of visual impaired  
31  
32 314 patients was not associated with their wealth and patients with one of the highest  
33  
34 315 reimbursement rate insurance (CMI) had the poorest life quality in our study. Thus, efforts  
35  
36 316 are needed to promote the access to adequate and effective treatment for visual impaired  
37  
38 317 patients to alleviate their diseases and recover their sight. Moreover, the government should  
39  
40 318 evade the inconvenience with daily living of the visual impaired patients by consciously  
41  
42 319 redesigning the built environment, public facilities and services.

43  
44 320 We spent 3 months in two tertiary hospitals to interview 298 individuals. Due to the  
45  
46 321 limitation of movement for patients with VI in China several limitations to this study should  
47  
48 322 be noted. First, the face-to-face interviews were conducted in tertiary general hospitals in  
49  
50 323 Beijing, which might result in a sample with higher education levels, income, treatment costs,  
51  
52 324 better health insurance, more serious disease than the average level of all the patients with VI  
53  
54 325 in China. Second, there could have been recall bias because the data were self-reported by the  
55  
56 326 patients.

57 327

## 58 328 **CONCLUSION**

59 329 Our study provided primary information for the economic burden and QoL of visual  
60 330 impairment associated with eye diseases of patients in China, indicating that compared with  
331 331 people who were sighted, people with VI experienced greater difficulties with daily living,  
332 332 higher economic burden, greater chance of CHE and poorer QoL. The findings in this study

1  
2 333 suggested that preferential medical insurance policies should be designed of VI to further  
3  
4 334 reduce the health inequalities, avoid the CHE and enhance the QoL.

5  
6 335

7 336 **Acknowledgements** Our sincere appreciation to Professor Suodi Zhai and Chief Nurse Zheng  
8  
9 337 Liu from the sample hospitals who provided great support for this study. The authors  
10  
11 338 gratefully acknowledge all investigators participating in this study for their diligent work.

12 339 **Contributors:** Xiaodong Guan, Fanghui Lin and Luwen Shi conceptualised and designed the  
13  
14 340 study. Fanghui Lin and Mengyuan Fu conducted the questionnaire survey. Mengyuan Fu and  
15  
16 341 Dawei Zhu contributed to analysis of the data. Xiaodong Guan, Luwen Shi, Daniel Vuillermin  
17  
18 342 and Mengyuan Fu conducted the final analysis and drafted the initial manuscript. All authors  
19  
20 343 contributed to the critical revision of the paper and approved the final manuscript.

21 344 **Funding** This research received a grant from Beijing Novartis Pharma Co., Ltd. The funders  
22  
23 345 had no role in study design, data collection and analysis, decision to publish, or preparation  
24  
25 346 of the manuscript.

26 347 **Competing interests** None declared.

27  
28 348 **Ethics approval** Ethics committee approval obtained from Peking University Institution  
29  
30 349 Review Board (No. IRB00001052-16003). All participants were informed by an information  
31  
32 350 sheet and have signed the declaration of consent to participate in the study.

33 351 **Provenance and peer review** Not commissioned; externally peer reviewed.

34 352 **Data sharing statement** Data of this study can be available upon reasonable request from  
35  
36 353 prof. Luwen Shi, shiluwen211@163.com. In order to ensure full anonymity, confidentiality  
37  
38 354 and data protection for the participants, the full survey data cannot be made accessible to the  
39  
40 355 public.

## REFERENCES

- [1] Zhang M, Song ZJ, Xia HZ, Shen J. Situation analysis of medication among geriatric chronic disease. *Chin J New Drugs Clin Rem.* 2016;35:469-472.
- [2] Freeman EE, Roy-Gagnon MH, Samson E, et al. The global burden of visual difficulty in low, middle, and high income countries. *PLoS One.* 2013; 8(5):e63315.
- [3] Bourne RRA, Flaxman SR, Braithwaite T, et al. Magnitude, temporal trends, and projections of the global prevalence of blindness and distance and near vision impairment: a systematic review and meta-analysis. *Lancet Glob Health.* 2017;5: e888-e897.
- [4] Taylor HR, Pezzullo ML, Nesbitt SJ, Keeffe JE. Costs of interventions for visual impairment. *Am J Ophthalmol.* 2007;143:561-565.
- [5] World Health Organization. Global data on visual impairment 2010. Available from: <https://www.who.int/blindness/publications/globaldata/en/>, accessed 23 February 2019.
- [6] Cheng JW, Cheng SW, Cai JP, Li Y, Wei RL. The prevalence of visual impairment in older adults in mainland China: a systematic review and meta-analysis. *Ophthalmic Res.* 2013;49:1-10.
- [7] Dunzhu S, Wang FS, Courtright P, et al. Blindness and eye diseases in Tibet: findings from a randomised, population based survey. *Br J Ophthalmol.* 2003;87:1443-1448.
- [8] National Bureau of Statistics of the People's Republic of China. The second national handicapped person sampling survey main data bulletin. Available from: <http://www.stats.gov.cn/tjsj/ndsj/shehui/2006/html/fu3.htm>, accessed 21 April 2017.
- [9] Pascolini D, Mariotti SP. Global estimates of visual impairment: 2010. *Br J Ophthalmol.* 2012;96:614-618.
- [10] Gordois A, Cutler H, Pezzullo L, et al. An estimation of the worldwide economic and health burden of visual impairment. *Glob Public Health.* 2012;7:465-481.
- [11] World Health Organization. World Health Report 2004: Changing History. Available from: <http://www.who.int/whr/2004/en/>, accessed 2 May 2017.
- [12] Köberlein J, Beifus K, Schaffert C, Finger RP. The economic burden of visual impairment and blindness: a systematic review. *BMJ Open.* 2013;3:e003471.
- [13] Taylor HR, Pezzullo ML, Keeffe JE. The economic impact and cost of visual impairment in Australia. *Br J Ophthalmol.* 2006;90:272-275.
- [14] Traverso CE, Walt JG, Kelly SP, et al. Direct costs of glaucoma and severity of the disease: a multinational long term study of resource utilisation in Europe. *Br J Ophthalmol.* 2005;89(10):1245-1249.
- [15] World Health Organization. Blindness and vision impairment. Available from: <https://www.who.int/en/news-room/fact-sheets/detail/blindness-and-visual-impairment>, accessed 22 February 2019.
- [16] World Health Organization. Coding instructions for the WHO/PBL eye examination record (version III) Available from: [http://apps.who.int/iris/bitstream/10665/67896/1/PBL\\_88.1.pdf](http://apps.who.int/iris/bitstream/10665/67896/1/PBL_88.1.pdf), accessed 3 July 2019.
- [17] Calkins TE, Darrith B, Okroj KT, et al. Utilizing the Time Trade-Off, Standard Gamble, and Willingness to Pay Utility Measures to Evaluate Health-Related Quality of Life Prior to Knee or Hip Arthroplasty. *J Arthroplasty.* 2019;34:9-14.
- [18] Oppe M, Rand-Hendriksen K, Shah K, Ramos-Gofi JM, Luo N. EuroQol Protocols for Time Trade-Off Valuation of Health Outcomes. *Pharmacoeconomics.* 2016;34:993-1004.
- [19] Jan S, Lee SW, Sawhney JP, et al. Catastrophic health expenditure on acute coronary events in Asia: a prospective study. *Bull World Health Organ.* 2016;94:193-200.
- [20] The World Bank. GDP per capita (current US\$). Available from: <https://data.worldbank.org.cn/indicator/NY.GDP.PCAP.CD?end=2015&page=5&start=1993>, accessed 3 July 2019.
- [21] Dilokthornsakul P, Chaiyakunapruk N, Ruamviboonsuk P, et al. Health resource utilization and the economic burden of patients with wet age-related macular degeneration in

- 1  
2 408 Thailand. *Int J Ophthalmol*. 2014;7(1):145-51.
- 3 409 [22] Rahman MQ, Beard SM, Discombe R, et al. Direct healthcare costs of glaucoma  
4 410 treatment. *Br J Ophthalmol*. 2013;97(6):720-724.
- 5 411 [23] Finger RP, Fenwick E, Chiang PP, et al. The impact of the severity of vision loss on  
6 412 vision-specific functioning in a German outpatient population—an observational study.  
7 413 *Graefes Arch Clin Exp Ophthalmol*. 2011;249:1245-1253.
- 8 414 [24] Zhang M, Song ZJ, Xia HZ, Shen J. Situation analysis of medication among geriatric  
9 415 chronic disease. *Chin J New Drugs Clin Rem*. 2016;35:469-472.
- 10 416 [25] Su D, Chen YC, Gao HX, et al. Effect of integrated urban and rural residents medical  
11 417 insurance on the utilisation of medical services by residents in China: a propensity score  
12 418 matching with difference-in-differences regression approach. *BMJ Open*. 2019;9:e026408.
- 13 419 [26] Dou G, Wang Q, Ying X. Reducing the medical economic burden of health insurance in  
14 420 China: Achievements and challenges. *Biosci Trends*. 2018;12:215-219.
- 15 421 [27] Liu J, Chen H, Chen Y, et al. Exploring the relationship between migrants' purchasing of  
16 422 commercial medical insurance and urbanisation in China. *BMC Health Serv Res*.  
17 423 2018;18(1):679.
- 18 424 [28] Han J, Meng Y. Institutional differences and geographical disparity: the impact of  
19 425 medical insurance on the equity of health services utilization by the floating elderly population  
20 426 - evidence from China. *Int J Equity Health*. 2019;18(1):91.
- 21 427 [29] Kume A, Ohshiro T, Sakurada Y, et al. Treatment Patterns and Health Care Costs for  
22 428 Age-Related Macular Degeneration in Japan: An Analysis of National Insurance Claims Data.  
23 429 *Ophthalmology*. 2016;123(6):1263-1268.
- 24 430 [30] Ministry of Human Resources and Social Security of the People's Republic of China.  
25 431 Notice on the inclusion of 36 kinds of drugs in the Category B of the National Basic Medical  
26 432 Insurance, Employment Injury Insurance and Maternity Insurance Drug List. Available from:  
27 433 [http://www.mohrss.gov.cn/SYrlzyhshbzb/shehuibaozhang/zcwj/yiliao/201707/t20170718\\_274153.html](http://www.mohrss.gov.cn/SYrlzyhshbzb/shehuibaozhang/zcwj/yiliao/201707/t20170718_274153.html), accessed 3 July 2019.
- 28 434 [31] Lazcano-Gomez G, Ramos-Cadena ML, Torres-Tamayo M, et al. Cost of glaucoma  
29 435 treatment in a developing country over a 5-year period. *Medicine (Baltimore)*.  
30 436 2016;95(47):e5341.
- 31 437 [32] Brown MM, Brown GC, Stein JD, et al. Age-related macular degeneration: economic  
32 438 burden and value-based medicine analysis. *Can J Ophthalmol*. 2005;40:277-287.
- 33 439 [33] Wang X, Lamoureux E, Zheng Y, et al. Health burden associated with visual impairment  
34 440 in Singapore: the Singapore epidemiology of eye disease study. *Ophthalmology*.  
35 441 2014;121:1837-1842.
- 36 442 [34] Ong SY, Cheung CY, Li X, et al. Visual impairment, age-related eye diseases, and  
37 443 cognitive function: the Singapore Malay Eye study. *Arch Ophthalmol*. 2012;130:895-900.
- 38 444 [35] Briesen S, Roberts H, Finger RP. The impact of visual impairment on health-related  
39 445 quality of life in rural Africa. *Ophthalmic Epidemiol*. 2014;21(5):297-306.
- 40 446 [36] Brown MM, Brown GC, Sharma S, Landy J. Health care economic analyses and value-  
41 447 based medicine. *Surv Ophthalmol*. 2003;48:204-223.
- 42 448 [37] Lou L, Wang J, Xu P, et al. Socioeconomic Disparity in Global Burden of Cataract: An  
43 449 Analysis for 2013 With Time Trends Since 1990. *Am J Ophthalmol*. 2017;180:91-96.
- 44 450 [38] Kishimoto F, Naito T, Hasebe S, et al. Time trade-off utility analysis for surgical  
45 451 intervention in comitant strabismus, glaucoma, and cataract. *Acta Med Okayama*.  
46 452 2012;66(3):191-201..
- 47 453 [39] Bambara JK, Owsley C, Wadley V, et al. Family caregiver social problem-solving  
48 454 abilities and adjustment to caring for a relative with vision loss. *Invest Ophthalmol Vis Sci*.  
49 455 2009;50:1585-1592.
- 50  
51  
52  
53  
54  
55  
56  
57  
58  
59  
60



457 **Table 1** General characteristics of sample visual impaired patients in 2015.

| Characteristics          | n (%)      | Outpatient visit | Inpatient visit | Hospital stay per visit (days) | Household income (USD) |
|--------------------------|------------|------------------|-----------------|--------------------------------|------------------------|
| <b>Total</b>             | <b>298</b> | <b>9.7</b>       | <b>0.6</b>      | <b>2.7</b>                     | <b>13,457.8</b>        |
| <b>Age</b>               |            |                  |                 |                                |                        |
| 19-50 years old          | 39 (13.1)  | 11.4             | 1.1             | 3.5                            | 12,696.0               |
| 51-70 years old          | 125 (41.9) | 10.8             | 0.6             | 2.6                            | 13,452.4               |
| 71-90 years old          | 134 (45.0) | 8.1              | 0.4             | 2.5                            | 13,684.4               |
| <b>Gender</b>            |            |                  |                 |                                |                        |
| Male                     | 142 (47.7) | 10.7             | 0.6             | 2.7                            | 14,408.2               |
| Female                   | 156 (52.3) | 8.8              | 0.5             | 2.7                            | 12,592.6               |
| <b>Ethnicity</b>         |            |                  |                 |                                |                        |
| Han                      | 278 (93.3) | 9.4              | 0.6             | 2.7                            | 12,788.9               |
| Minority                 | 20 (6.7)   | 13.9             | 0.7             | 2.1                            | 22,755.0               |
| <b>Educational level</b> |            |                  |                 |                                |                        |
| Primary and below        | 71 (23.8)  | 9.3              | 0.5             | 1.9                            | 6,945.0                |
| Middle and high school   | 159 (53.4) | 9.9              | 0.6             | 2.7                            | 13,853.7               |
| College and above        | 68 (22.8)  | 9.6              | 0.7             | 3.3                            | 19,332.0               |
| <b>Occupation *</b>      |            |                  |                 |                                |                        |
| Management personnel     | 32 (10.7)  | 12.1             | 0.8             | 2.3                            | 15,623.8               |
| Professional personnel   | 81 (27.2)  | 9.0              | 0.6             | 2.5                            | 16,599.2               |
| General staff            | 89 (29.9)  | 10.1             | 0.6             | 2.2                            | 14,206.2               |
| Farmer                   | 56 (18.8)  | 6.9              | 0.4             | 2.0                            | 4,707.6                |
| Other professions        | 11 (3.7)   | 14.0             | 0.5             | 2.9                            | 28,215.5               |
| Unemployed               | 29 (9.7)   | 7.7              | 1.0             | 3.1                            | 11,295.3               |
| <b>Marital status</b>    |            |                  |                 |                                |                        |
| Unmarried                | 44 (14.8)  | 5.0              | 0.8             | 2.4                            | 12,740.7               |

| Characteristics             | n (%)      | Outpatient visit | Inpatient visit | Hospital stay per visit (days) | Household income (USD) |
|-----------------------------|------------|------------------|-----------------|--------------------------------|------------------------|
| Married                     | 254 (85.2) | 10.5             | 0.5             | 2.7                            | 13,582.0               |
| <b>Living status</b>        |            |                  |                 |                                |                        |
| Alone                       | 16 (5.4)   | 7.9              | 0.6             | 5.6                            | 6,304.6                |
| With family                 | 282 (94.6) | 9.8              | 0.6             | 2.5                            | 13,863.6               |
| <b>Current living place</b> |            |                  |                 |                                |                        |
| Urban                       | 214 (71.8) | 9.7              | 0.6             | 2.7                            | 15,792.0               |
| Rural                       | 84 (28.2)  | 9.6              | 0.6             | 2.6                            | 7,511.1                |
| <b>Medical insurance †</b>  |            |                  |                 |                                |                        |
| None                        | 8 (2.7)    | 18.1             | 1.4             | 3                              | 18,299.2               |
| NCMS                        | 71 (23.8)  | 9.8              | 0.6             | 2.3                            | 15,099.4               |
| URBMI                       | 40 (13.4)  | 8.1              | 0.4             | 1.8                            | 11,345.5               |
| UEBMI                       | 123 (41.3) | 10.2             | 0.5             | 3.6                            | 6,333.6                |
| GMI                         | 42 (14.1)  | 7.9              | 0.5             | 1.8                            | 31,936.8               |
| CMI                         | 14 (4.7)   | 5.5              | 1.5             | 1.4                            | 4,249.6                |
| <b>level of VI</b>          |            |                  |                 |                                |                        |
| Moderate VI                 | 174 (58.4) | 9.7              | 0.4             | 1.8                            | 15,021.5               |
| Severe VI                   | 86 (28.9)  | 9.6              | 0.7             | 3.5                            | 12,308.5               |
| Blind                       | 38 (12.8)  | 10.0             | 1.2             | 4.7                            | 8,898.5                |
| <b>Duration of VI ‡</b>     |            |                  |                 |                                |                        |
| 3-6 months                  | 36 (12.1)  | 4.6              | 0.4             | 1.3                            | 12,948.3               |
| 6-12 months                 | 48 (16.1)  | 7.5              | 0.5             | 2.8                            | 9,755.8                |
| More than 12 months         | 214 (71.8) | 11.1             | 0.6             | 2.9                            | 14,373.8               |
| <b>Cause of VI</b>          |            |                  |                 |                                |                        |
| Cataract                    | 80 (26.8)  | 4.8              | 0.3             | 1.5                            | 10,898.1               |
| AMD                         | 35 (11.7)  | 12.1             | 0.3             | 1.4                            | 12,185.9               |
| Vascular retinopathy        | 27 (9.1)   | 8.9              | 0.9             | 2.1                            | 14,326.4               |

| Characteristics          | n (%)     | Outpatient visit | Inpatient visit | Hospital stay per visit (days) | Household income (USD) |
|--------------------------|-----------|------------------|-----------------|--------------------------------|------------------------|
| Glaucoma                 | 17 (5.7)  | 16.7             | 1.2             | 6.2                            | 17,850.1               |
| Other eye diseases       | 60 (20.1) | 10.1             | 0.6             | 2.6                            | 11,511.3               |
| Multiple ocular diseases | 79 (26.5) | 12.0             | 0.7             | 3.8                            | 16,849.5               |
| <b>Economic status §</b> |           |                  |                 |                                |                        |
| Lowest                   | 59 (19.8) | 10.0             | 0.6             | 2.3                            | 2,445.9                |
| Lower                    | 59 (19.8) | 7.7              | 0.8             | 3.9                            | 6,464.2                |
| Middle                   | 60 (20.1) | 8.3              | 0.5             | 3.3                            | 10,890.3               |
| Higher                   | 60 (20.1) | 14.2             | 0.5             | 1.4                            | 15,481.5               |
| Highest                  | 60 (20.1) | 8.4              | 0.6             | 2.4                            | 32,134.7               |

\* Occupation included current profession of unretired participants and former profession for the retired. Professional personnel were professional and technical personnel, i.e. teachers, doctors, lawyers, engineer among others.

† Public insurance included new cooperative medical scheme in rural area (NCMS), urban employee basic medical insurance (UEBMI), urban resident basic medical insurance (URBMI) and Government medical insurance (GMI). NCMS was insurance for rural residents, UEBMI was for urban employees of urban enterprises, and URBMI was for those who were not employed or flexible employees and children with urban household registration, students of urban schools, and rural migrants who worked in cities. GMI, also called publicly-funded free medical care, was insurance for some of the civil servants and personnel at public institutions. Commercial medical insurance (CMI) was supplements of public medical insurance, purchased by respondents' employers or by themselves from insurance company.

‡ Duration of VI was defined by the period from the time which the participants became their current visual impaired level.

§ Economic status was divided into five equal intervals based on household income per capita of the study participants. Lowest US\$[60.7, 1274.9]; Lower US\$[1365.9, 2428.3]; Middle US\$[2529.5, 4097.8]; Higher US\$[4249.6, 6677.9]; Highest US\$[7183.8, 37942.6].

**Table 2** Annual direct costs of Chinese patients with visual impairment associated with ocular diseases.

| Characteristics               | Mean (USD) | Median (USD) | Max (USD) | Min (USD) | Proportion (%) |
|-------------------------------|------------|--------------|-----------|-----------|----------------|
| <b>Direct medical costs *</b> |            |              |           |           | <b>70.3</b>    |
| <b>Outpatient costs</b>       |            |              |           |           | 69.4           |
| Total                         | 3,408.5    | 607.1        | 68,296.7  | 0.0       |                |
| Drug                          | 2,352.7    | 215.5        | 54,637.3  | 0.0       |                |
| Out-of-pocket                 | 3,048.5    | 324.8        | 68,296.7  | 0.0       |                |
| <b>Inpatient costs</b>        |            |              |           |           | 27.9           |
| Total                         | 1,369.5    | 0.0          | 31,871.8  | 0.0       |                |
| Drug                          | 408.8      | 0.0          | 12,748.7  | 0.0       |                |



|                                       |         |         |           |      |              |
|---------------------------------------|---------|---------|-----------|------|--------------|
| Out-of-pocket                         | 1,034.8 | 0.0     | 31,871.8  | 0.0  |              |
| <b>Self-purchased drugs costs</b>     |         |         |           |      | 2.7          |
| Total                                 | 131.8   | 0.0     | 4,553.1   | 0.0  |              |
| Out-of-pocket                         | 128.3   | 0.0     | 4,553.1   | 0.0  |              |
| <b>Total direct medical costs</b>     | 4,909.8 | 1,517.7 | 70,573.2  | 0.0  | 100.0        |
| <b>Direct non-medical costs</b>       |         |         |           |      | <b>29.7</b>  |
| Long-term home care                   | 1,216.6 | 0.0     | 28,836.4  | 0.0  | 58.5         |
| Transportation                        | 149.8   | 15.2    | 5,463.7   | 0.0  | 7.2          |
| Food or accommodation                 | 176.8   | 0.0     | 9,106.2   | 0.0  | 8.5          |
| Escort †                              | 161.1   | 15.2    | 6,677.9   | 0.0  | 7.7          |
| Nutrition or assistive devices        | 277.1   | 0.0     | 4,629.0   | 0.0  | 13.3         |
| Home modifications                    | 97.5    | 0.0     | 6,070.8   | 0.0  | 4.7          |
| <b>Total direct non-medical costs</b> | 2,078.8 | 440.1   | 33,237.7  | 0.0  | 100.0        |
| <b>Total direct costs</b>             | 6,988.6 | 2,281.8 | 101,079.1 | 45.5 | <b>100.0</b> |

\* Direct medical costs measured the cost of resources used for treating a particular illness and consisted of outpatient costs, inpatient costs and self-purchased drugs costs. Outpatient costs were vision-related medical costs during outpatient visits, including registration fee, medical service fee, treatment fee, examination fee, drug expenses, medical supply expenses, etc. Inpatient costs were vision-related medical costs during hospitalization, including medical service fee, treatment fee, examination fee, surgery fee, drug expenses, medical supply expenses, etc. Expenditures of medicine prescribed and purchased during outpatient and inpatient visits in hospitals were included in outpatient and inpatient drug costs, respectively. The cost of self-purchased drugs was the expense of the drugs that patients bought in pharmacies (not in hospitals) for their ocular disease treatment after the initial diagnosis.

† Cost of escort were meals, transport and accommodation costs encountered by patients' escorts during all outpatient or inpatient visits.

**Table 3** Reimbursement rate, proportion of CHE and QoL by related characteristics.

| Characteristics    | Reimbursement rate (%)* |            |            |             | CHE            |          | QoL         |          |
|--------------------|-------------------------|------------|------------|-------------|----------------|----------|-------------|----------|
|                    | Outpatient              | Inpatient  | SPD        | Total       | Proportion (%) | <i>p</i> | Mean        | <i>p</i> |
| <b>Total</b>       | <b>28.1</b>             | <b>9.5</b> | <b>2.7</b> | <b>26.9</b> | <b>32.2</b>    |          | <b>0.65</b> |          |
| <b>Level of VI</b> |                         |            |            |             |                |          |             |          |
| Moderate VI        | 29.9                    | 6.4        | 2.9        | 28.1        | 28.2           | 0.014    | 0.69        | 0.001    |
| Severe VI          | 26.9                    | 14.8       | 2.9        | 27.0        | 31.4           |          | 0.65        |          |
| Blind              | 22.2                    | 11.7       | 1.4        | 21.4        | 52.6           |          | 0.49        |          |
| <b>Cause of VI</b> |                         |            |            |             |                |          |             |          |
| Cataract           | 29.5                    | 4.3        | 2.3        | 26.7        | 17.5           | 0.010    | 0.76        | 0.000    |
| AMD                | 26.9                    | 7.6        | 0.6        | 23.9        | 51.4           |          | 0.72        |          |

| Characteristics             | Reimbursement rate (%)* |           |     |       | CHE            |          | QoL  |          |
|-----------------------------|-------------------------|-----------|-----|-------|----------------|----------|------|----------|
|                             | Outpatient              | Inpatient | SPD | Total | Proportion (%) | <i>p</i> | Mean | <i>p</i> |
| Vascular retinopathy        | 24.8                    | 9.4       | 1.7 | 25.2  | 37.0           |          | 0.67 |          |
| Glaucoma                    | 32.4                    | 19.7      | 0.0 | 24.8  | 41.2           |          | 0.64 |          |
| Other eye diseases          | 22.2                    | 6.8       | 5.1 | 23.5  | 31.7           |          | 0.59 |          |
| Multiple ocular diseases    | 31.7                    | 15.5      | 3.2 | 32.1  | 35.4           |          | 0.56 |          |
| <b>Current living place</b> |                         |           |     |       |                |          |      |          |
| Urban                       | 30.9                    | 15.0      | 5.9 | 33.5  | 26.2           | 0.000    | 0.67 | 0.450    |
| Rural                       | 27.9                    | 9.2       | 2.5 | 26.5  | 47.6           |          | 0.62 |          |
| <b>Medical insurance</b>    |                         |           |     |       |                |          |      |          |
| None                        | 0.0                     | 0.0       | 0.0 | 0.0   | 50.0           | 0.008    | 0.64 | 0.003    |
| NCMS                        | 14.2                    | 4.9       | 2.3 | 13.9  | 47.9           |          | 0.63 |          |
| URBMI                       | 24.2                    | 6.9       | 4.3 | 21.6  | 25.0           |          | 0.81 |          |
| UEBMI                       | 35.7                    | 11.3      | 2.1 | 33.5  | 30.9           |          | 0.63 |          |
| GMI                         | 38.5                    | 14.5      | 2.6 | 38.0  | 16.7           |          | 0.66 |          |
| CMI                         | 26.8                    | 15.4      | 7.1 | 31.4  | 21.4           |          | 0.49 |          |
| <b>Economic status</b>      |                         |           |     |       |                |          |      |          |
| Lowest                      | 15.0                    | 4.7       | 3.1 | 14.7  | 54.2           | 0.001    | 0.59 | 0.559    |
| Lower                       | 25.4                    | 12.2      | 2.5 | 23.3  | 33.9           |          | 0.66 |          |
| Middle                      | 28.7                    | 8.3       | 2.9 | 31.3  | 26.7           |          | 0.68 |          |
| Higher                      | 31.7                    | 7.0       | 0.0 | 27.2  | 21.7           |          | 0.73 |          |
| Highest                     | 39.3                    | 15.4      | 4.9 | 38.0  | 25.0           |          | 0.62 |          |

\* Medical insurance reimbursement rate in our study was the percent of the whole year costs that is covered by insurance.

† Abbreviations: SPD, self-purchased drugs costs; CHE, catastrophic healthcare expenditure; QoL, quality of life; NCMS, new cooperative medical scheme; UEBMI, urban employee basic medical insurance; URBMI, urban resident basic medical insurance; GMI, government medical insurance; CMI, commercial medical insurance.

## Supplementary File

### Burden of visual impairment associated with eye diseases: an exploratory survey of 298 Chinese patients

#### Appendix 1 The items of the survey questionnaire.

| Variable name                            | Description                                                                                        |
|------------------------------------------|----------------------------------------------------------------------------------------------------|
| <b>Sociodemographic information</b>      |                                                                                                    |
| age                                      | [19,50], [51,70], [71,90]                                                                          |
| gender                                   | Male, Female                                                                                       |
| ethnicity                                | Han, Minority                                                                                      |
| educational level                        | Primary and below, Middle and high school, College and above                                       |
| Occupation *                             | Management personnel, Professional personnel, General staff, Farmer, Other professions, Unemployed |
| marital status                           | Unmarried, Married                                                                                 |
| living status                            | Alone, With family                                                                                 |
| current living place                     | Urban, Rural                                                                                       |
| medical insurance †                      | None, NCMS, URBMI, UEBMI, GMI, CMI,                                                                |
| personal income                          | Continuous                                                                                         |
| household size                           | Continuous                                                                                         |
| household income                         | Continuous                                                                                         |
| <b>Clinic-related information</b>        |                                                                                                    |
| level of visual impairment               | moderate VI , severe VI , blind                                                                    |
| Duration of visual impairment ‡          | 3-6 months, 6-12 months, More than 12 months                                                       |
| Cause of visual impairment               | Cataract, AMD, Vascular retinopathy, Glaucoma, Other eye diseases, Multiple ocular diseases        |
| Outpatient visit                         | Continuous                                                                                         |
| Inpatient visit                          | Continuous                                                                                         |
| Hospital stay per visit                  | Continuous                                                                                         |
| <b>Economic burden</b>                   |                                                                                                    |
| <b>Direct medical costs §</b>            |                                                                                                    |
| Outpatient costs                         | Continuous                                                                                         |
| Outpatient drug costs                    | Continuous                                                                                         |
| Outpatient out-of-pocket costs           | Continuous                                                                                         |
| Inpatient costs                          | Continuous                                                                                         |
| Inpatient drug costs                     | Continuous                                                                                         |
| Inpatient out-of-pocket costs            | Continuous                                                                                         |
| Self-purchased drugs costs               | Continuous                                                                                         |
| Self-purchased drugs out-of-pocket costs | Continuous                                                                                         |
| <b>Direct non-medical costs</b>          |                                                                                                    |
| Long-term home care costs                | Continuous                                                                                         |
| Transportation costs                     | Continuous                                                                                         |
| Food or accommodation costs              | Continuous                                                                                         |
| Escort costs                             | Continuous                                                                                         |
| Nutrition or assistive devices costs     | Continuous                                                                                         |
| Home modifications                       | Continuous                                                                                         |
| <b>Quality of life</b>                   | Continuous                                                                                         |

\* Occupation included current profession of unretired participants and former profession for the retired. Professional personnel were professional and technical personnel, i.e. teachers, doctors, lawyers, engineer, etc.

† Public insurance included new cooperative medical scheme in rural area (NCMS), urban employee basic medical insurance (UEBMI), urban resident basic medical insurance (URBMI) and government medical insurance (GMI). Commercial medical insurance (CMI) was supplements of public medical insurance purchased by respondents' employers or by themselves.

‡ Duration of VI was defined by the period from the time which the participants became their current visual impaired level.

§ Direct medical costs measured the cost of resources used for treating a particular illness, consisted of outpatient costs, inpatient costs and self-purchased drugs costs. Expenditures for medicine prescribed and purchased during outpatient and inpatient visits in hospitals were included in outpatient and inpatient drug costs, respectively. The cost of self-purchased drugs was the expense of the drugs that patients bought in pharmacies (not in hospitals) for their ocular disease treatment after the initial diagnosis.

|| Cost of escort were meals, transport and accommodation costs encountered by patients' escorts during all outpatient or inpatient visits.

## Supplementary File

## Burden of visual impairment associated with eye diseases: an exploratory survey of 298 Chinese patients

## Appendix 2 Annual direct costs of different visual impaired patients in China.

| Characteristics          | Direct medical costs (USD) |                |                      |                | Direct non-medical costs (USD) |                |                       |              |                                |                    |                | Total direct costs (USD) |
|--------------------------|----------------------------|----------------|----------------------|----------------|--------------------------------|----------------|-----------------------|--------------|--------------------------------|--------------------|----------------|--------------------------|
|                          | Outpatient                 | Inpatient      | Self-purchased drugs | Total          | Long-term home care            | Transportation | Food or accommodation | Escort       | Nutrition or assistive devices | Home modifications | Total          |                          |
| <b>Total</b>             | <b>3,408.5</b>             | <b>1,369.5</b> | <b>131.8</b>         | <b>4,909.8</b> | <b>1,216.6</b>                 | <b>149.8</b>   | <b>176.7</b>          | <b>161.1</b> | <b>277.1</b>                   | <b>97.5</b>        | <b>2,078.8</b> | <b>6,988.6</b>           |
| <b>Age</b>               |                            |                |                      |                |                                |                |                       |              |                                |                    |                |                          |
| 19-50 years old          | 2,009.3                    | 3,572.4        | 211.5                | 5,793.2        | 1,269.1                        | 248.1          | 407.7                 | 249.6        | 77.8                           | 43.2               | 2,295.5        | 8,088.7                  |
| 51-70 years old          | 3,479.0                    | 1,062.6        | 156.3                | 4,697.9        | 963.7                          | 161.1          | 216.6                 | 178.5        | 226.3                          | 75.3               | 1,821.6        | 6,519.6                  |
| 71-90 years old          | 3,749.9                    | 1,014.6        | 85.8                 | 4,850.3        | 1,437.2                        | 110.6          | 72.4                  | 119.1        | 382.4                          | 134.0              | 2,255.7        | 7,106.0                  |
| <b>Gender</b>            |                            |                |                      |                |                                |                |                       |              |                                |                    |                |                          |
| Male                     | 3,321.3                    | 1,860.7        | 98.6                 | 5,280.6        | 1,069.2                        | 130.7          | 132.7                 | 179.2        | 300.4                          | 118.4              | 1,930.6        | 7,211.2                  |
| Female                   | 3,487.8                    | 922.4          | 162.0                | 4,572.3        | 1,350.8                        | 167.2          | 216.9                 | 144.6        | 255.8                          | 78.5               | 2,213.8        | 6,786.0                  |
| <b>Ethnicity</b>         |                            |                |                      |                |                                |                |                       |              |                                |                    |                |                          |
| Han                      | 3,404.2                    | 1,325.0        | 130.2                | 4,859.4        | 1,039.7                        | 135.5          | 166.1                 | 167.0        | 250.6                          | 86.5               | 1,845.5        | 6,704.8                  |
| Minority                 | 3,468.1                    | 1,988.2        | 154.7                | 5,611.0        | 3,675.2                        | 348.7          | 324.7                 | 78.2         | 645.0                          | 250.4              | 5,322.3        | 10,933.2                 |
| <b>Educational level</b> |                            |                |                      |                |                                |                |                       |              |                                |                    |                |                          |
| Primary and below        | 2,924.6                    | 991.6          | 85.3                 | 4,001.6        | 2,331.9                        | 173.9          | 138.3                 | 96.1         | 146.7                          | 51.3               | 2,938.2        | 6,939.8                  |
| Middle and high school   | 3,894.0                    | 1,440.2        | 174.5                | 5,508.7        | 887.0                          | 134.9          | 163.0                 | 210.6        | 237.4                          | 117.8              | 1,750.8        | 7,259.6                  |
| College and above        | 2,778.4                    | 1,598.7        | 80.5                 | 4,457.7        | 822.8                          | 159.4          | 248.9                 | 113.2        | 505.8                          | 98.3               | 1,948.5        | 6,406.2                  |
| <b>Occupation</b>        |                            |                |                      |                |                                |                |                       |              |                                |                    |                |                          |
| Management personnel     | 5,325.1                    | 2,859.9        | 131.6                | 8,316.6        | 840.4                          | 125.8          | 115.9                 | 149.4        | 274.8                          | 38.4               | 1,544.7        | 9,861.3                  |
| Professional personnel   | 3,924.7                    | 1,129.7        | 137.3                | 5,191.6        | 1,035.5                        | 182.0          | 281.2                 | 207.9        | 503.9                          | 111.5              | 2,322.1        | 7,513.7                  |
| General staff            | 2,751.8                    | 1,414.9        | 97.5                 | 4,264.1        | 1,592.0                        | 156.1          | 136.3                 | 97.0         | 211.6                          | 109.5              | 2,302.4        | 6,566.5                  |
| Farmer                   | 3,246.6                    | 483.0          | 137.8                | 3,867.3        | 1,036.3                        | 128.3          | 141.2                 | 147.0        | 127.0                          | 32.6               | 1,612.5        | 5,479.8                  |
| Other professions        | 2,467.8                    | 2,635.3        | 146.8                | 5,249.9        | 2,731.9                        | 172.9          | 242.8                 | 226.6        | 531.3                          | 275.9              | 4,181.6        | 9,431.4                  |
| Unemployed               | 2,536.8                    | 1,487.3        | 204.9                | 4,229.1        | 758.8                          | 100.0          | 119.8                 | 242.1        | 40.4                           | 144.4              | 1,405.7        | 5,634.8                  |
| <b>Marital status</b>    |                            |                |                      |                |                                |                |                       |              |                                |                    |                |                          |
| Unmarried                | 869.9                      | 1,715.0        | 172.2                | 2,757.1        | 1,922.0                        | 78.0           | 59.7                  | 71.5         | 120.7                          | 79.4               | 2,331.4        | 5,088.5                  |
| Married                  | 3,848.2                    | 1,309.6        | 124.8                | 5,282.7        | 1,094.4                        | 162.2          | 197.0                 | 176.6        | 304.2                          | 100.6              | 2,035.1        | 7,317.8                  |
| <b>Living status</b>     |                            |                |                      |                |                                |                |                       |              |                                |                    |                |                          |
| Alone                    | 1,546.6                    | 1,218.0        | 138.6                | 2,903.2        | 1,015.9                        | 82.9           | 39.2                  | 126.8        | 158.1                          | 95.8               | 1,518.7        | 4,422.0                  |
| With family              | 3,514.1                    | 1,378.1        | 131.4                | 5,023.6        | 1,228.0                        | 153.6          | 184.6                 | 163.0        | 283.8                          | 97.6               | 2,110.6        | 7,134.3                  |

| Characteristics          | Direct medical costs (USD) |           |                      |         | Direct non-medical costs (USD) |                |                       |        |                                |                    |         | Total direct costs (USD) |
|--------------------------|----------------------------|-----------|----------------------|---------|--------------------------------|----------------|-----------------------|--------|--------------------------------|--------------------|---------|--------------------------|
|                          | Outpatient                 | Inpatient | Self-purchased drugs | Total   | Long-term home care            | Transportation | Food or accommodation | Escort | Nutrition or assistive devices | Home modifications | Total   |                          |
| <b>Current residence</b> |                            |           |                      |         |                                |                |                       |        |                                |                    |         |                          |
| Urban                    | 3,463.3                    | 1,411.9   | 105.2                | 4,980.5 | 1,347.2                        | 143.6          | 176.7                 | 136.5  | 319.9                          | 111.6              | 2,235.7 | 7,216.1                  |
| Rural                    | 3,268.7                    | 1,261.5   | 199.5                | 4,729.8 | 883.8                          | 165.5          | 176.9                 | 223.8  | 167.8                          | 61.5               | 1,679.8 | 6,409.1                  |
| <b>Medical insurance</b> |                            |           |                      |         |                                |                |                       |        |                                |                    |         |                          |
| None                     | 298.9                      | 4,249.6   | 202.1                | 4,750.5 | 4,078.8                        | 192.6          | 147.0                 | 180.2  | 154.5                          | 151.8              | 4,905.0 | 9,655.5                  |
| NCMS                     | 3,488.4                    | 1,208.2   | 209.3                | 4,905.9 | 881.5                          | 156.2          | 173.2                 | 233.0  | 96.9                           | 42.8               | 1,583.8 | 6,489.6                  |
| URBMI                    | 3,258.8                    | 359.3     | 65.0                 | 3,683.1 | 1,061.2                        | 71.0           | 23.5                  | 86.2   | 103.0                          | 25.0               | 1,370.0 | 5,053.1                  |
| UEBMI                    | 3,351.3                    | 1,658.9   | 123.1                | 5,133.3 | 1,251.4                        | 181.4          | 225.9                 | 115.2  | 326.5                          | 112.1              | 2,212.4 | 7,345.7                  |
| GMI                      | 3,924.8                    | 1,368.5   | 92.1                 | 5,385.3 | 1,585.7                        | 128.4          | 183.4                 | 252.0  | 500.4                          | 195.1              | 2,845.0 | 8,230.3                  |
| CMI                      | 4,160.8                    | 888.9     | 85.7                 | 5,135.4 | 311.7                          | 104.2          | 197.8                 | 130.1  | 653.7                          | 130.1              | 1,527.6 | 6,663.0                  |
| <b>level of VI</b>       |                            |           |                      |         |                                |                |                       |        |                                |                    |         |                          |
| Moderate VI              | 3,120.7                    | 853.8     | 118.6                | 4,093.1 | 916.4                          | 142.4          | 138.5                 | 125.9  | 222.0                          | 65.3               | 1,610.4 | 5,703.5                  |
| Severe VI                | 4,479.9                    | 1,694.5   | 147.5                | 6,321.8 | 1,793.8                        | 158.7          | 226.7                 | 128.2  | 293.3                          | 137.0              | 2,737.6 | 9,059.5                  |
| Blind                    | 2,301.6                    | 2,995.5   | 156.8                | 5,453.9 | 1,284.8                        | 163.9          | 238.9                 | 396.6  | 492.7                          | 155.8              | 2,732.6 | 8,186.5                  |
| <b>duration of VI</b>    |                            |           |                      |         |                                |                |                       |        |                                |                    |         |                          |
| 3-6 months               | 1,574.8                    | 503.8     | 225.0                | 2,303.6 | 1,643.7                        | 103.1          | 89.4                  | 110.6  | 308.8                          | 123.5              | 2,379.2 | 4,682.7                  |
| 6-12 months              | 2,182.5                    | 1,070.6   | 70.9                 | 3,324.0 | 429.4                          | 152.8          | 282.8                 | 104.2  | 104.5                          | 85.4               | 1,159.1 | 4,483.0                  |
| More than 12 months      | 3,992.0                    | 1,582.2   | 129.8                | 5,703.9 | 1,321.3                        | 157.0          | 167.6                 | 182.4  | 310.4                          | 95.9               | 2,234.6 | 7,938.6                  |
| <b>Cause of VI</b>       |                            |           |                      |         |                                |                |                       |        |                                |                    |         |                          |
| Cataract                 | 1,236.9                    | 583.9     | 27.5                 | 1,848.3 | 790.1                          | 55.1           | 67.7                  | 48.4   | 63.2                           | 19.4               | 1,043.7 | 2,892.0                  |
| AMD                      | 8,162.3                    | 524.7     | 134.8                | 8,821.8 | 346.9                          | 189.3          | 172.0                 | 174.6  | 480.9                          | 0.0                | 1,363.7 | 10,185.5                 |
| Vascular retinopathy     | 4,151.1                    | 2,270.9   | 249.9                | 6,671.9 | 930.5                          | 139.1          | 84.9                  | 141.1  | 237.9                          | 194.2              | 1,727.8 | 8,399.7                  |
| Glaucoma                 | 4,909.7                    | 2,297.1   | 208.0                | 7,414.8 | 380.0                          | 78.6           | 100.9                 | 102.7  | 118.7                          | 35.7               | 816.6   | 8,231.4                  |
| Other eye diseases       | 1,656.8                    | 2,350.2   | 180.2                | 4,187.1 | 1,781.2                        | 278.0          | 414.6                 | 203.0  | 145.3                          | 76.4               | 2,898.5 | 7,085.7                  |
| Multiple ocular diseases | 4,255.0                    | 1,286.8   | 142.7                | 5,684.5 | 1,882.8                        | 149.8          | 156.4                 | 256.8  | 550.9                          | 216.2              | 3,212.9 | 8,897.5                  |
| <b>Economic status</b>   |                            |           |                      |         |                                |                |                       |        |                                |                    |         |                          |
| Lowest                   | 3,662.3                    | 1,342.8   | 177.1                | 5,182.2 | 1,523.5                        | 254.6          | 315.7                 | 294.5  | 173.4                          | 36.0               | 2,597.8 | 7,780.0                  |
| Lower                    | 1,996.4                    | 1,738.2   | 95.0                 | 3,829.6 | 479.0                          | 174.2          | 295.0                 | 158.1  | 200.8                          | 54.9               | 1,362.1 | 5,191.7                  |
| Middle                   | 2,614.7                    | 1,345.7   | 142.5                | 4,102.9 | 1,196.1                        | 94.0           | 37.3                  | 77.9   | 220.6                          | 76.1               | 1,702.0 | 5,804.9                  |
| Higher                   | 4,761.2                    | 934.9     | 114.9                | 5,811.0 | 800.9                          | 84.0           | 49.2                  | 108.5  | 250.0                          | 5.0                | 1,297.7 | 7,108.7                  |
| Highest                  | 3,988.4                    | 1,491.6   | 129.7                | 5,609.8 | 2076.3                         | 144.4          | 190.8                 | 168.6  | 537.5                          | 313.7              | 3,431.3 | 9,041.1                  |

\* Abbreviations: NCMS, new cooperative medical scheme; UEBMI, urban employee basic medical insurance; URBMI, urban resident basic medical insurance; GMI, government medical insurance; CMI, commercial medical insurance.

STROBE Statement—Checklist of items that should be included in reports of *cross-sectional studies*

|                              | Item No | Recommendation                                                                                                                                                                                               | Page No |
|------------------------------|---------|--------------------------------------------------------------------------------------------------------------------------------------------------------------------------------------------------------------|---------|
| <b>Title and abstract</b>    | 1       | (a) Indicate the study's design with a commonly used term in the title or the abstract                                                                                                                       | 1       |
|                              |         | (b) Provide in the abstract an informative and balanced summary of what was done and what was found                                                                                                          | 2       |
| <b>Introduction</b>          |         |                                                                                                                                                                                                              |         |
| Background/rationale         | 2       | Explain the scientific background and rationale for the investigation being reported                                                                                                                         | 4       |
| Objectives                   | 3       | State specific objectives, including any prespecified hypotheses                                                                                                                                             | 4       |
| <b>Methods</b>               |         |                                                                                                                                                                                                              |         |
| Study design                 | 4       | Present key elements of study design early in the paper                                                                                                                                                      | 4       |
| Setting                      | 5       | Describe the setting, locations, and relevant dates, including periods of recruitment, exposure, follow-up, and data collection                                                                              | 5       |
| Participants                 | 6       | (a) Give the eligibility criteria, and the sources and methods of selection of participants                                                                                                                  | 5       |
| Variables                    | 7       | Clearly define all outcomes, exposures, predictors, potential confounders, and effect modifiers. Give diagnostic criteria, if applicable                                                                     | 6       |
| Data sources/<br>measurement | 8*      | For each variable of interest, give sources of data and details of methods of assessment (measurement). Describe comparability of assessment methods if there is more than one group                         | 6       |
| Bias                         | 9       | Describe any efforts to address potential sources of bias                                                                                                                                                    | 6       |
| Study size                   | 10      | Explain how the study size was arrived at                                                                                                                                                                    | 5       |
| Quantitative variables       | 11      | Explain how quantitative variables were handled in the analyses. If applicable, describe which groupings were chosen and why                                                                                 | 6       |
| Statistical methods          | 12      | (a) Describe all statistical methods, including those used to control for confounding                                                                                                                        | 6-7     |
|                              |         | (b) Describe any methods used to examine subgroups and interactions                                                                                                                                          | 6-7     |
|                              |         | (c) Explain how missing data were addressed                                                                                                                                                                  | /       |
|                              |         | (d) If applicable, describe analytical methods taking account of sampling strategy                                                                                                                           | /       |
|                              |         | (e) Describe any sensitivity analyses                                                                                                                                                                        | /       |
| <b>Results</b>               |         |                                                                                                                                                                                                              |         |
| Participants                 | 13*     | (a) Report numbers of individuals at each stage of study—eg numbers potentially eligible, examined for eligibility, confirmed eligible, included in the study, completing follow-up, and analysed            | 7       |
|                              |         | (b) Give reasons for non-participation at each stage                                                                                                                                                         | 7       |
|                              |         | (c) Consider use of a flow diagram                                                                                                                                                                           | /       |
| Descriptive data             | 14*     | (a) Give characteristics of study participants (eg demographic, clinical, social) and information on exposures and potential confounders                                                                     | 7       |
|                              |         | (b) Indicate number of participants with missing data for each variable of interest                                                                                                                          | /       |
| Outcome data                 | 15*     | Report numbers of outcome events or summary measures                                                                                                                                                         | 7-9     |
| Main results                 | 16      | (a) Give unadjusted estimates and, if applicable, confounder-adjusted estimates and their precision (eg, 95% confidence interval). Make clear which confounders were adjusted for and why they were included | /       |

|                          |    |                                                                                                                                                                            |       |
|--------------------------|----|----------------------------------------------------------------------------------------------------------------------------------------------------------------------------|-------|
|                          |    | (b) Report category boundaries when continuous variables were categorized                                                                                                  | 15-17 |
|                          |    | (c) If relevant, consider translating estimates of relative risk into absolute risk for a meaningful time period                                                           | /     |
| Other analyses           | 17 | Report other analyses done—eg analyses of subgroups and interactions, and sensitivity analyses                                                                             | 18-19 |
| <b>Discussion</b>        |    |                                                                                                                                                                            |       |
| Key results              | 18 | Summarise key results with reference to study objectives                                                                                                                   | 9     |
| Limitations              | 19 | Discuss limitations of the study, taking into account sources of potential bias or imprecision. Discuss both direction and magnitude of any potential bias                 | 11    |
| Interpretation           | 20 | Give a cautious overall interpretation of results considering objectives, limitations, multiplicity of analyses, results from similar studies, and other relevant evidence | 9-11  |
| Generalisability         | 21 | Discuss the generalisability (external validity) of the study results                                                                                                      | /     |
| <b>Other information</b> |    |                                                                                                                                                                            |       |
| Funding                  | 22 | Give the source of funding and the role of the funders for the present study and, if applicable, for the original study on which the present article is based              | 12    |

\*Give information separately for exposed and unexposed groups.

**Note:** An Explanation and Elaboration article discusses each checklist item and gives methodological background and published examples of transparent reporting. The STROBE checklist is best used in conjunction with this article (freely available on the Web sites of PLoS Medicine at <http://www.plosmedicine.org/>, Annals of Internal Medicine at <http://www.annals.org/>, and Epidemiology at <http://www.epidem.com/>). Information on the STROBE Initiative is available at [www.strobe-statement.org](http://www.strobe-statement.org).

# BMJ Open

## Burden of visual impairment associated with eye diseases: an exploratory survey of 298 Chinese patients

|                                 |                                                                                                                                                                                                                                                                                                                                                                                                                                                                                                                                                                                                                                                                               |
|---------------------------------|-------------------------------------------------------------------------------------------------------------------------------------------------------------------------------------------------------------------------------------------------------------------------------------------------------------------------------------------------------------------------------------------------------------------------------------------------------------------------------------------------------------------------------------------------------------------------------------------------------------------------------------------------------------------------------|
| Journal:                        | <i>BMJ Open</i>                                                                                                                                                                                                                                                                                                                                                                                                                                                                                                                                                                                                                                                               |
| Manuscript ID                   | bmjopen-2019-030561.R2                                                                                                                                                                                                                                                                                                                                                                                                                                                                                                                                                                                                                                                        |
| Article Type:                   | Original research                                                                                                                                                                                                                                                                                                                                                                                                                                                                                                                                                                                                                                                             |
| Date Submitted by the Author:   | 19-Aug-2019                                                                                                                                                                                                                                                                                                                                                                                                                                                                                                                                                                                                                                                                   |
| Complete List of Authors:       | Guan, Xiaodong; Peking University, Department of Pharmacy Administration and Clinical Pharmacy<br>Fu, Mengyuan; Peking University, Department of Pharmacy Administration and Clinical Pharmacy<br>Lin, Fanghui; Peking University, International Research Center for Medicinal Administration<br>Zhu, Dawei; Chinese Academy of Medical Sciences and Peking Union Medical College, Center for Health Policy and Management, Institute of Medical Information & Library<br>Vuillermin, Daniel; Peking University, School of Health Humanities<br>Shi, Luwen; School of Pharmaceutical Sciences, Peking University, Department of Pharmacy Administration and Clinical Pharmacy |
| <b>Primary Subject Heading</b>: | Health economics                                                                                                                                                                                                                                                                                                                                                                                                                                                                                                                                                                                                                                                              |
| Secondary Subject Heading:      | Public health, Ophthalmology                                                                                                                                                                                                                                                                                                                                                                                                                                                                                                                                                                                                                                                  |
| Keywords:                       | economic burden, catastrophic healthcare expenditure, quality of life, visual impairment                                                                                                                                                                                                                                                                                                                                                                                                                                                                                                                                                                                      |
|                                 |                                                                                                                                                                                                                                                                                                                                                                                                                                                                                                                                                                                                                                                                               |

SCHOLARONE™  
Manuscripts



1  
2 **1 Burden of visual impairment associated with eye diseases: an exploratory**  
3  
4 **2 survey of 298 Chinese patients**  
5

6 3

7 4 Xiaodong Guan,<sup>1,2</sup> Mengyuan Fu,<sup>1</sup> Fanghui Lin,<sup>2</sup> Dawei Zhu,<sup>2,3</sup> Daniel Vuillermin,<sup>4</sup> and Luwen  
8 5 Shi <sup>1,2\*</sup>  
9

10 6

11 7 <sup>1</sup> School of Pharmaceutical Sciences, Peking University, Beijing, China; <sup>2</sup> International  
12 8 Research Center for Medicinal Administration, Peking University, Beijing, China; <sup>3</sup> China  
13 9 Center for Health Development Studies, Peking University, Beijing, China; <sup>4</sup> School of Health  
14 10 Humanities, Peking University, Beijing, China  
15

16 11

17 12 \* **Corresponding author.** Department of Pharmacy Administration and Clinical Pharmacy,  
18 13 School of Pharmaceutical Sciences, Peking University, 38 Xueyuan Road, Haidian District,  
19 14 Beijing, 100191, China. Tel & Fax: 86-10-82805019. E-mail: [shiluwen211@163.com](mailto:shiluwen211@163.com)  
20 15

21 16

22 17 **Keywords:** economic burden, catastrophic healthcare expenditure, quality of life, visual  
23 18 impairment  
24 19

25 20

26 21

27 22 **Word count:** 3,192  
28 23  
29 24  
30 25  
31 26  
32 27  
33 28  
34 29  
35 30  
36 31  
37 32  
38 33  
39 34  
40 35  
41 36  
42 37  
43 38  
44 39  
45 40  
46 41  
47 42  
48 43  
49 44  
50 45  
51 46  
52 47  
53 48  
54 49  
55 50  
56 51  
57 52  
58 53  
59 54  
60 55

1  
2 **Abstract**

3  
4 **Objectives** To explore the economic burden, prevalence of catastrophic healthcare  
5  
6  
7  
8 expenditure (CHE) and the quality of life (QoL) of Chinese patients with visual impairment  
9  
10 (VI) associated with eye diseases.

11  
12 **Design** A questionnaire survey from March to May 2016 by structured face-to-face interviews  
13  
14  
15 of patients with VI.

16  
17 **Participants** 302 patients who were diagnosed with moderate VI or worse in both eyes  
18  
19  
20 (VA<6/18) were included and 298 patients (98.7%) completed the survey questionnaires were  
21  
22  
23 eligible for the study.

24  
25 **Outcome measures** The economic burden was estimated by calculating participants' direct  
26  
27  
28 costs covered in 2015 and the definition of CHE was out-of-pocket costs exceeding 30% of  
29  
30  
31 annual household income. QoL was weighed by health utility value using time-trade-off  
32  
33  
34 valuation techniques.

35  
36 **Results** Annual average direct costs per patient caused by VI were US\$6988.6±10834.3 and  
37  
38  
39 70.3% were direct medical costs of which only 26.9% were reimbursable by medical  
40  
41  
42 insurance. 32.2% of households suffered from CHE, in particular, less wealthy patients with  
43  
44  
45 VI living in rural areas and without medical insurance. The health utility value was rated at  
46  
47  
48 0.65 on average and VI patients aged 51-57, living alone and insured by commercial medical  
49  
50  
51 insurance had relatively less QoL.

52  
53 **Conclusion** Our study explored the economic burden and QoL of visual impairment  
54  
55  
56 associated with patients with eye diseases in China, indicating a substantial economic burden  
57  
58  
59 and poor quality of life. Preferential medical insurance policies should be designed in relation  
60  
61  
62 to people with VI to further reduce the health inequalities, avoid CHE and promote QoL.

1  
2 45 **Article Summary**

3  
4 46 **Strengths and limitations of this study**

5 47 1. To our knowledge, this is the first study to explore the prevalence of CHE and QoL of  
6 Chinese patients with VI associated with eye diseases.

7 48  
8 49 2. The face-to-face interviews were conducted in two tertiary general hospitals in Beijing,  
9 which might result in potential sample selection bias.

10 50  
11 51 3. There could have been recall bias because the data were self-reported by the patients.  
12  
13  
14  
15  
16  
17  
18  
19  
20  
21  
22  
23  
24  
25  
26  
27  
28  
29  
30  
31  
32  
33  
34  
35  
36  
37  
38  
39  
40  
41  
42  
43  
44  
45  
46  
47  
48  
49  
50  
51  
52  
53  
54  
55  
56  
57  
58  
59  
60

For peer review only

## 54 INTRODUCTION

55 With a large rapidly-aging population in mainland China, visual impairment (VI) is  
56 emerging as a significant public health concern [1]. According to the World Health Survey  
57 (2003), one in five adults reported some degree of far visual difficulty [2]. In 2015, the number  
58 of people with moderate VI or worse was estimated to be 253 million globally [3]. More than  
59 80% of the global total of VI occurs in developing countries [4], and 26.5% of the total of VI  
60 occurs in China [5]. The prevalence of VI in China is 0.94% yet, for the people older than 50,  
61 this figure rises to 5.8%. In Tibet, one of the highest and harshest human habitations on earth,  
62 the prevalence is 13.2% [6-8].

63 The main impact of VI is a diminished ability to perform daily activities, which often results  
64 in high health expenditures and the loss of independence [9]. The total financial cost of VI  
65 worldwide was estimated to be \$3 trillion in 2010 or \$4,030 per person who is visually  
66 impaired [10]. In addition to the economic burden, VI also has extensive social ramifications in  
67 terms of participation in society, employment and quality of life (QoL). The World Health  
68 Organization (WHO) estimated that 1% of the total global burden of disease measured as  
69 Disability-Adjusted Life Years (DALY) attributable to VI increased by 47% from 12.9  
70 million DALYs in 1990 to 18.8 million DALYs in 2010 [11, 12].

71 The burden of VI has been well researched in countries such as the United States, Australia  
72 and some European countries [12-14]. However, little is known about the economic burden and  
73 QoL of patients with VI associated with eye diseases in China. Therefore, we undertook an  
74 explanatory survey to: quantify the economic burden; identify the prevalence of catastrophic  
75 healthcare expenditure (CHE); and describe the QoL of Chinese patients with VI associated  
76 with ocular diseases. The results will provide primary information for policy-makers when  
77 allocating limited public insurance financial resources in mainland China.

## 79 METHODS

### 80 Questionnaire design

81 We conducted a questionnaire survey by structured face-to-face interviews of patients with  
82 VI. The study questionnaire included standardized items developed by reviewing related  
83 research as well as items developed by consulting ophthalmologists and pharmacists. The  
84 survey questionnaire included four parts: 1. sociodemographic information; 2. clinic-related  
85 information; 3. economic burden; 4. Quality of life.

#### 86 *Sociodemographic information*

87 Age, gender, ethnicity, educational level, occupation, marital status, living status, current  
88 living place, medical insurance, personal income, household size and household income were

1  
2 89 included.

3  
4 90 ***Clinic-related information***

5 91 Healthcare service utilization, treatment history and level of visual impairment were  
6 92 included. The level of VI was divided into three categories based on the WHO visual acuity  
7 93 (VA) categorization principles: 1. moderate VI ( $6/60 < VA < 6/18$ ); 2. severe VI  
8 94 ( $3/60 < VA < 6/60$ ); 3. Total blindness ( $VA < 3/60$ )<sup>[15]</sup>. Causes of VI were noted using standard  
9 95 WHO methodology for surveys on VI<sup>[16]</sup>.

10  
11  
12  
13  
14 96 ***Economic burden***

15 97 Economic burden was estimated by calculating participants' direct costs related to the  
16 98 diagnosis, treatment and follow up care of eye diseases leading to VI and the expenses related  
17 99 to the vision loss/inability to see in the year 2015. Direct costs included direct medical costs,  
20 100 which were further divided into insurance covered and out-of-pocket parts, and direct non-  
21 101 medical costs.

22  
23  
24 102 ***Quality of life***

25 103 The time trade-off (TTO) valuation technique is a commonly used QoL measurement,  
26 104 which is understood by the majority of patients and shows good reproducibility<sup>[17]</sup>. In our  
27 105 study, TTO determined the length of lifetime the respondent would be willing to forego to  
28 106 live in perfect health by asking, "Assuming you will only live for 10 years, what is the  
29 107 maximum amount of that time, if any, you would be willing to trade for a return to permanent  
30 108 perfect vision (1.0) during the years that remain?"<sup>[18]</sup>

31 109 The questionnaire was designed and optimized by ophthalmologists and clinical  
32 110 pharmacists in Beijing, China. After conducting a pilot field research study in a tertiary  
33 111 hospital in Beijing, all of the experts agreed that the questionnaire was valid. The items and  
34 112 descriptions of survey questionnaire were shown in **Appendix 1**.

35 113

36 114 **Recruitment and sampling**

37 115 Two tertiary hospitals in Beijing were recruited based on the volume of ocular outpatient  
38 116 visits using convenience sampling methods. Participants were eligible for inclusion in the  
39 117 study if they were diagnosed with moderate VI or worse in both eyes ( $VA < 6/18$ ) and were  
40 118 physically and mentally able to participate in the survey and agreed to participate in the study.  
41 119 We excluded participants who were pregnant, had a concomitant malignant disease or an  
42 120 inability to complete the questionnaire. Given the time required for each face-to-face  
43 121 interview and the volume of VI patient visits in the both sample hospitals per day, we aimed  
44 122 to collect data from approximately 300 patients.

45 123

## 124 **Data collection and quality control**

125 A questionnaire survey was conducted from March to May 2016 by structured face-to-face  
126 interviews of outpatients admitted in ophthalmic department in Peking University Third  
127 Hospital and Beijing Hospital. These two hospitals accept most ocular outpatient visits in  
128 Beijing. All of the investigators were trained for standard processes via a workshop before  
129 implementation of the survey to minimize performance bias. In order to control ascertainment  
130 bias, the investigators read all the contents of the questionnaire during the face-to-face  
131 interviews to establish that patients with VI could hear and understand the questions. The  
132 interviews lasted approximately 0.5-1 hours to collect detailed information. The researchers  
133 emphasized to participants that only vision-related costs were to be included after reading  
134 through every question in the economic burden section to ensure accurate recording of  
135 economic burden. Survey data were recorded on paper forms and translated using Epidata3.1.  
136 All patients were de-identified into a unique project sequence number during data analysis to  
137 ensure anonymity and control analysis bias.

## 139 **Outcome measures**

### 140 *Catastrophic healthcare expenditure*

141 CHE was defined as out-of-pocket (OOP) for healthcare over a year that exceeded a certain  
142 proportion of a household's income. This threshold had been defined in many ways. One of  
143 the most common definitions was OOP costs exceeding 30% of annual household income<sup>[19]</sup>.

### 144 *Quality of life*

145 Answers to the time trade-off questions were converted to utility value.

$$146 Z = (10 - N) / 10$$

147 Z was the health utility value; N was the number of years that the respondents were willing  
148 to trade for a return to permanent perfect vision. Utility values were anchored on a scale  
149 between 0 (the preference for death rather than living in the patient's current state of health)  
150 and 1 (a perception of perfect health)<sup>[17]</sup>.

## 152 **Statistical analysis**

153 Costs and income were assessed in Chinese Yuan (CNY) and converted into United States  
154 dollars (USD) uniformly based on exchange rates on June 1, 2016 (1 USD=6.5889 CNY) to  
155 make the results more comparable to other published studies.

156 STATA 14.0 was applied to conduct the following statistical analysis: 1. descriptive  
157 analysis of the participants' demographic information, healthcare service utilization,  
158 insurance reimbursement rate, expenditures, CHE prevalence and QoL; 2. bivariate chi-square

1  
2 159 test on the difference of CHE prevalence and QoL value between subgroups. The level of  
3  
4 160 statistical significance was  $p < 0.05$  (two-sided).

5 161

## 7 162 **Ethics Statement**

8  
9 163 Ethics committee approval obtained from Peking University Institution Review Board (No.  
10 164 IRB00001052-16003). All participants were informed by an information sheet and have  
11  
12 165 signed the declaration of consent to participate in the study.

13  
14 166

## 16 167 **Patient and public involvement**

17 168 There were no patients and public involved in the development of the research  
18  
19 169 questionnaire, the outcome measures, the design, recruitment and implementation of the study.  
20  
21 170 The results will be disseminated through scientific journals.

22  
23 171

## 24 172 **RESULTS**

### 26 173 **Description of demographic characteristics**

27  
28 174 A total of 302 patients were included and 298 completed questionnaires were eligible for  
29  
30 175 this study, yielding a response rate of 98.7%. Patients' demographic data are shown in **Table**  
31 176 **1**. The mean age in sample was 65.4 and there were slightly fewer males (47.7%). Most of the  
32  
33 177 participants were married (85.2%), living with family (94.6%) and in urban areas (71.8%).  
34  
35 178 41.3% of the participants were covered by Urban Employee Basic Medical Insurance  
36 179 (UEBMI), 23.8% by New Cooperative Medical Scheme (NCMS), 14.1% by Government  
37  
38 180 Medical Insurance (GMI), and 13.4% by Urban Resident Basic Medical Insurance (URBMI).

39  
40 181 Of the visual-related health conditions reported, 58.4% had moderate VI, 28.9% had severe  
41 182 VI, and 12.8% were blind. 71.8% of the participants had been suffered from VI for more than  
42  
43 183 one year. 26.8%, 11.7% and 9.1% of the participants' VI were caused by cataract, AMD and  
44  
45 184 vascular retinopathy separately, while 26.5% by multiple ocular diseases. The annual  
46  
47 185 personnel income and household income of the participants were US\$6,266.4±10,403.2 and  
48  
49 186 US\$13,457.8±16,711.9, respectively.

50 187

### 52 188 **Healthcare service utilization**

53  
54 189 As shown in **Table 1**, the average number of healthcare service utilization due to VI within  
55  
56 190 1 year was 9.7 outpatient visits, ranging from 4.8 visits (cataract) to 16.7 visits (glaucoma).  
57  
58 191 Average number and length of inpatient hospital visits were 0.6 visit within 1 year and 2.7  
59  
60 192 days of hospital staying per visit.

193



## 194 **Direct costs**

195 The total direct medical costs were US\$6,988.6±10,834.3 in 2015, including direct medical  
196 costs of US\$4,909.8±8,981.7 (70.3%) and direct non-medical costs of US\$2,078.8±4,430.6  
197 (29.7%).

198 As shown in **Table 2**, of the direct medical costs, outpatient fees represented the largest  
199 costs at US\$3,408.5 (69.4%), followed by inpatient costs at US\$1,369.5 (27.9%). Except  
200 outpatient and inpatient costs, the participants also purchased drugs by themselves in retail  
201 pharmacies (2.7%). Only 10.6% of the outpatient costs, 24.4% of the inpatient costs and 2.6%  
202 of the self-purchased drug costs were covered by the medical insurance. Average total OOP  
203 costs per patient were US\$4211.6 (85.8%).

204 Direct non-medical costs occurred mostly due to long-term home care at US\$1,216.6  
205 (58.5%). Nutrition or assistive devices, food and accommodation, escort, transportation, and  
206 home modifications costs accounted for 13.3%, 8.5%, 7.7%, 7.2% and 4.7% respectively.

207 The specific costs among different groups were shown in the **Appendix 2**.

## 209 **Insurance reimbursement rate**

210 As shown in **Table 3**, 28.1%, 9.5%, 2.7% and 26.9% of the outpatient, inpatient, self-  
211 purchased drugs and total direct medical costs caused by VI were reimbursable. However, the  
212 reimbursement rate decreased with the severity of VI (moderate VI 28.1%, severe VI 27.0%,  
213 blind 21.4%) and increased with patient's economic status (lowest 15.0%, lower 25.4%,  
214 middle 28.7%, higher 31.7% and highest 39.3%). Rural patients received a lower  
215 reimbursement rate (13.9%) as most of their medical insurance scheme was NCMS which has  
216 much lower reimbursement rate than other insurance schemes. The reimbursement rate of  
217 different diseases ranged from AMD (23.9%) and glaucoma (24.8%) to cataract (26.7%) and  
218 multiple ocular diseases (32.1%).

## 220 **Prevalence of CHE**

221 Patients with VI paid in direct medical costs an average amount equal to 111.5% of their  
222 individual annual income and 51.9% of their household's annual income. As shown in **Table**  
223 **3**, 32.2% households suffered from CHE caused by VI. The prevalence of CHE was generally  
224 correlated with the severity of VI (moderate VI 28.2%, severe VI 31.4%, blind 52.6%;  $p<0.05$ ).  
225 Patients living in rural areas generally had greater risk of CHE compared with urban residents  
226 (47.6%, 26.2%;  $p<0.001$ ). Of all of the different types of medical insurances, the CHE  
227 prevalence of patients without medical insurance and insured by NCMS ostensibly  
228 outweighed those insured by GMI and CMI (none 50.0%, NCMS 47.9%, GMI 16.7%, CMI



229 21.4%;  $p<0.01$ ). In relation to the patients' economic status, the less wealthy patients (those  
230 with lower or the lowest economic status) were much more likely to encounter CHE than  
231 wealthier patients ( $p<0.01$ ). Patients with AMD (51.4%) and glaucoma (24.8%) had much  
232 higher risk of CHE than those with cataract (17.5%,  $p=0.01$ ).

### 234 QoL

235 As shown in **Table 3**, the value of QoL was 0.65 on average and correlated with the severity  
236 of VI (moderate VI 0.69, severe VI 0.65, blind 0.49;  $p<0.01$ ). Middle-aged patients (51-70)  
237 had the poorest life quality (0.58;  $p<0.001$ ) and patients living alone had relatively poorer  
238 QoL than living with family (0.58, 0.68;  $p<0.01$ ). Of all of the different types of medical  
239 insurances, the health utility values of patients insured by CMI were significantly lower than  
240 those insured by URBMI (0.49, 0.81;  $p<0.01$ ). Patients with multiple ocular diseases (0.56)  
241 had relatively poorer QoL than those with cataract (0.76) and AMD (0.72,  $p<0.001$ ).

### 243 DISCUSSION

244 This study provided primary information for the economic burden and QoL of Chinese  
245 patients with VI associated with ocular diseases, indicating a substantial burden of VI, with  
246 considerable variation among the different level of VI, type of medical insurance and  
247 economic status.

248 In our study, annual direct medical costs per VI patient associated with ocular disease were  
249 US\$4,093.1 for moderate VI, US\$6,321.8 for severe VI and US\$5,453.9 for blindness, which  
250 were much lower than several previous studies in the US, which reported mean annual direct  
251 medical expenses per patient to be US\$12,175-14,029 for moderate VI, US\$13,154-16,321  
252 for severe VI and US\$14,882-24,180 for blindness<sup>[12]</sup>. This was understandable as the gross  
253 domestic product per capita of China was much lower than the United States in 2015 (China  
254 (US\$8,033.4), US (US\$56,803.5))<sup>[20]</sup>. Direct medical costs occurred mostly due to outpatient  
255 visits, which was inconsistent with formal findings in the United States and Australia that  
256 direct medical costs occurred mostly due to hospitalization<sup>[12]</sup>. As for different diseases, AMD  
257 and glaucoma reported highest average annual direct medical costs in our study (US\$8,821.8,  
258 US\$7,414.8), which were higher than studies of AMD in Thailand (US\$3,604),<sup>[21]</sup> and  
259 glaucoma in Germany (€814-€1195), UK (€457-1065), France (€313-€1002) and Italy (€153-  
260 €791).<sup>[14,22]</sup> Previous studies demonstrated that even mild visual impairment had a significant  
261 and independent impact on vision-specific functioning<sup>[23]</sup> and diminished ability to perform  
262 activities of daily living alone, which led to long-term care for patients. Therefore, it was not  
263 surprising that the highest direct non-medical costs came from long-term home care (58.5%).

1  
2 264 A possible explanation for high nutrition or assistive devices costs (13.3%) in our study was  
3  
4 265 that people in China were keen on buying nutrition or devices that usually advertised in the  
5  
6 266 media,<sup>[24]</sup> especially those visually impaired patients who rarely went out and had no other  
7  
8 267 choices but to listen to TV for entertainment.

9 268 Our research showed that Chinese patients with VI had a relatively-high financial burden,  
10  
11 269 resulting in 32.2% households suffered from CHE. Patients with VI paid in direct costs an  
12  
13 270 average amount equal to 111.5% of their individual annual income and 51.9% of their  
14  
15 271 household's annual income, which indicated that the patients themselves are clearly unable to  
16  
17 272 meet such substantial costs and the exorbitant burden was too costly for even the entire  
18  
19 273 household to maintain. In particular, for households that have a lower economic status, the  
20  
21 274 discrepancy between costs and income was greater, which made them more vulnerable facing  
22  
23 275 the CHE. Medical insurance plays a vital role in preventing patients from CHE by assisting  
24  
25 276 to cover patients' medical expenses. However, our results showed that the average insurance  
26  
27 277 reimbursement rate of Chinese VI patients was low (26.9%), and varied greatly between  
28  
29 278 different insurance schemes. Patients without medical insurance recorded the highest CHE  
30  
31 279 prevalence and patients insured by NCMS, with the relatively lowest reimbursement rate <sup>[25]</sup>,  
32  
33 280 had substantially higher CHE prevalence than those with the highest reimbursement rate (GMI  
34  
35 281 and CMI). Patients living in rural areas, who usually had a relatively low economic status and  
36  
37 282 were insured by NCMS <sup>[26]</sup> were ostensibly at greater risk of CHE. This was the result of the  
38  
39 283 "urban-rural dual structure" of medical insurance system in China, <sup>[27]</sup> which showed a  
40  
41 284 significant difference in coverage reimbursement scope, payment level, funding level, etc.<sup>[28]</sup>  
42  
43 285 Besides, our study found that higher severity level of VI caused higher direct costs, but  
44  
45 286 received a lower reimbursement rate, which resulted in dramatically increased risk of CHE  
46  
47 287 with the severity of VI. Furthermore, patients with AMD and glaucoma with a relatively low  
48  
49 288 reimbursement rate had a heavier economic burden and were more likely to incur catastrophic  
50  
51 289 spending. This result may largely due to the high price of AMD treatment therapy, <sup>[29]</sup> which  
52  
53 290 also explain the highest fraction of outpatient costs of AMD patients and limited drug covered  
54  
55 291 by medical insurance. This situation was alleviated after the national pricing negotiations on  
56  
57 292 two innovative but expensive medicines (Razumab and Conbercept) in 2017, which  
58  
59 293 eventually reached an average price discount of 18.74% by the pharmaceutical companies and  
60  
294 70% public medical insurance reimbursement rate by Chinese government. <sup>[30]</sup> Recommended  
295 management of glaucoma which requires regular attendance of follow-up clinic visits <sup>[31]</sup> may  
296 explain the highest number of outpatient visit, inpatient visit, the longest stay per inpatient  
297 visit as well as the high costs.

298 In addition to the economic burden posed by VI, our study also suggested that VI had a

1  
2 299 substantial negative effect on health-related QoL. Moreover, the life quality of patients with  
3  
4 300 VI (0.65) in our study was worse than patients with cancer (0.92), mild stroke (0.9), gout  
5  
6 301 (0.86), heart failure (0.78) and HIV/AIDS (0.70)<sup>[32]</sup>. This may largely due to the significant  
7  
8 302 association between VI and mental stress such as anxiety,<sup>[33]</sup> depression<sup>[9]</sup> and cognitive  
9  
10 303 functions.<sup>[34]</sup> Among the study population, the utility value decreased dramatically with  
11  
12 304 perceived total loss of vision, which was consistent with a study in rural Africa<sup>[35]</sup>. Previous  
13  
14 305 studies have suggested that the utility values most highly correlated with the visual acuity in  
15  
16 306 the better seeing eye, and as the vision in the better seeing eye decreased, the corresponding  
17  
18 307 utility value decreased.<sup>[36]</sup> Patients with cataract reported the highest TTO utility value (0.76)  
19  
20 308 than those with other diseases especially multi ocular diseases (0.56). One of the reasons for  
21  
22 309 this is that cataract can be effectively treated by surgery, which is a disability-preventing and  
23  
24 310 highly cost-effective intervention,<sup>[37]</sup> and patients' TTO utility value could improve  
25  
26 311 significantly after cataract surgery.<sup>[38]</sup> Besides, living with family could slightly enhance the  
27  
28 312 life quality rather than living alone because family members were often called on to provide  
29  
30 313 physical and emotional support.<sup>[39]</sup> However, unlike CHE, the life quality of visual impaired  
31  
32 314 patients was not associated with their wealth and patients with one of the highest  
33  
34 315 reimbursement rate insurance (CMI) had the poorest life quality in our study. Thus, efforts  
35  
36 316 are needed to promote the access to adequate and effective treatment for visual impaired  
37  
38 317 patients to alleviate their diseases and recover their sight. Moreover, the government should  
39  
40 318 evade the inconvenience with daily living of the visual impaired patients by consciously  
41  
42 319 redesigning the built environment, public facilities and services.

43  
44 320 We spent 3 months in two tertiary hospitals to interview 298 individuals. Due to the  
45  
46 321 limitation of movement for patients with VI in China several limitations to this study should  
47  
48 322 be noted. First, the study population is not fully representative of all the patients with VI in  
49  
50 323 mainland China. Second, the face-to-face interviews were conducted in tertiary general  
51  
52 324 hospitals in Beijing, which might result in a sample with higher education levels, income,  
53  
54 325 treatment costs, better health insurance, more serious disease than the average level of all the  
55  
56 326 patients with VI in China. Third, there could have been recall bias because the data were self-  
57  
58 327 reported by the patients.

59 328

## 60 329 **CONCLUSION**

61 330 Our study provided primary information for the economic burden and QoL of visual  
62  
63 331 impairment associated with eye diseases of patients in China, indicating that compared with  
64  
65 332 people who were sighted, people with VI experienced greater difficulties with daily living,  
66  
67 333 higher economic burden, greater chance of CHE and poorer QoL. The findings in this study

1  
2 334 suggested that preferential medical insurance policies should be designed of VI to further  
3  
4 335 reduce the health inequalities, avoid the CHE and enhance the QoL.

5  
6 336

7 337 **Acknowledgements** Our sincere appreciation to Professor Suodi Zhai and Chief Nurse Zheng  
8  
9 338 Liu from the sample hospitals who provided great support for this study. The authors  
10  
11 339 gratefully acknowledge all investigators participating in this study for their diligent work.

12 340 **Contributors:** Xiaodong Guan, Fanghui Lin and Luwen Shi conceptualised and designed the  
13  
14 341 study. Fanghui Lin and Mengyuan Fu conducted the questionnaire survey. Mengyuan Fu and  
15  
16 342 Dawei Zhu contributed to analysis of the data. Xiaodong Guan, Luwen Shi, Daniel Vuillermin  
17  
18 343 and Mengyuan Fu conducted the final analysis and drafted the initial manuscript. All authors  
19  
20 344 contributed to the critical revision of the paper and approved the final manuscript.

21 345 **Funding** This research received a grant from Beijing Novartis Pharma Co., Ltd. The funders  
22  
23 346 had no role in study design, data collection and analysis, decision to publish, or preparation  
24  
25 347 of the manuscript.

26 348 **Competing interests** None declared.

27  
28 349 **Ethics approval** Ethics committee approval obtained from Peking University Institution  
29  
30 350 Review Board (No. IRB00001052-16003). All participants were informed by an information  
31  
32 351 sheet and have signed the declaration of consent to participate in the study.

33 352 **Provenance and peer review** Not commissioned; externally peer reviewed.

34  
35 353 **Data sharing statement** Data of this study can be available upon reasonable request from  
36  
37 354 prof. Luwen Shi, shiluwen211@163.com. In order to ensure full anonymity, confidentiality  
38  
39 355 and data protection for the participants, the full survey data cannot be made accessible to the  
40  
41 356 public.

## REFERENCES

- [1] Zhang M, Song ZJ, Xia HZ, Shen J. Situation analysis of medication among geriatric chronic disease. *Chin J New Drugs Clin Rem.* 2016;35:469-472.
- [2] Freeman EE, Roy-Gagnon MH, Samson E, et al. The global burden of visual difficulty in low, middle, and high income countries. *PLoS One.* 2013; 8(5):e63315.
- [3] Bourne RRA, Flaxman SR, Braithwaite T, et al. Magnitude, temporal trends, and projections of the global prevalence of blindness and distance and near vision impairment: a systematic review and meta-analysis. *Lancet Glob Health.* 2017;5: e888-e897.
- [4] Taylor HR, Pezzullo ML, Nesbitt SJ, Keeffe JE. Costs of interventions for visual impairment. *Am J Ophthalmol.* 2007;143:561-565.
- [5] World Health Organization. Global data on visual impairment 2010. Available from: <https://www.who.int/blindness/publications/globaldata/en/>, accessed 23 February 2019.
- [6] Cheng JW, Cheng SW, Cai JP, Li Y, Wei RL. The prevalence of visual impairment in older adults in mainland China: a systematic review and meta-analysis. *Ophthalmic Res.* 2013;49:1-10.
- [7] Dunzhu S, Wang FS, Courtright P, et al. Blindness and eye diseases in Tibet: findings from a randomised, population based survey. *Br J Ophthalmol.* 2003;87:1443-1448.
- [8] National Bureau of Statistics of the People's Republic of China. The second national handicapped person sampling survey main data bulletin. Available from: <http://www.stats.gov.cn/tjsj/ndsj/shehui/2006/html/fu3.htm>, accessed 21 April 2017.
- [9] Pascolini D, Mariotti SP. Global estimates of visual impairment: 2010. *Br J Ophthalmol.* 2012;96:614-618.
- [10] Gordoys A, Cutler H, Pezzullo L, et al. An estimation of the worldwide economic and health burden of visual impairment. *Glob Public Health.* 2012;7:465-481.
- [11] World Health Organization. World Health Report 2004: Changing History. Available from: <http://www.who.int/whr/2004/en/>, accessed 2 May 2017.
- [12] Köberlein J, Beifus K, Schaffert C, Finger RP. The economic burden of visual impairment and blindness: a systematic review. *BMJ Open.* 2013;3:e003471.
- [13] Taylor HR, Pezzullo ML, Keeffe JE. The economic impact and cost of visual impairment in Australia. *Br J Ophthalmol.* 2006;90:272-275.
- [14] Traverso CE, Walt JG, Kelly SP, et al. Direct costs of glaucoma and severity of the disease: a multinational long term study of resource utilisation in Europe. *Br J Ophthalmol.* 2005;89(10):1245-1249.
- [15] World Health Organization. Blindness and vision impairment. Available from: <https://www.who.int/en/news-room/fact-sheets/detail/blindness-and-visual-impairment>, accessed 22 February 2019.
- [16] World Health Organization. Coding instructions for the WHO/PBL eye examination record (version III) Available from: [http://apps.who.int/iris/bitstream/10665/67896/1/PBL\\_88.1.pdf](http://apps.who.int/iris/bitstream/10665/67896/1/PBL_88.1.pdf), accessed 3 July 2019.
- [17] Calkins TE, Darrith B, Okroj KT, et al. Utilizing the Time Trade-Off, Standard Gamble, and Willingness to Pay Utility Measures to Evaluate Health-Related Quality of Life Prior to Knee or Hip Arthroplasty. *J Arthroplasty.* 2019;34:9-14.
- [18] Oppe M, Rand-Hendriksen K, Shah K, Ramos-Gofi JM, Luo N. EuroQol Protocols for Time Trade-Off Valuation of Health Outcomes. *Pharmacoeconomics.* 2016;34:993-1004.
- [19] Jan S, Lee SW, Sawhney JP, et al. Catastrophic health expenditure on acute coronary events in Asia: a prospective study. *Bull World Health Organ.* 2016;94:193-200.
- [20] The World Bank. GDP per capita (current US\$). Available from: <https://data.worldbank.org.cn/indicator/NY.GDP.PCAP.CD?end=2015&page=5&start=1993>, accessed 3 July 2019.
- [21] Dilokthornsakul P, Chaiyakunapruk N, Ruamviboonsuk P, et al. Health resource utilization and the economic burden of patients with wet age-related macular degeneration in



- 1  
2 409 Thailand. *Int J Ophthalmol*. 2014;7(1):145-51.
- 3 410 [22] Rahman MQ, Beard SM, Discombe R, et al. Direct healthcare costs of glaucoma  
4 411 treatment. *Br J Ophthalmol*. 2013;97(6):720-724.
- 5 412 [23] Finger RP, Fenwick E, Chiang PP, et al. The impact of the severity of vision loss on  
6 413 vision-specific functioning in a German outpatient population—an observational study.  
7 414 *Graefes Arch Clin Exp Ophthalmol*. 2011;249:1245-1253.
- 8 415 [24] Zhang M, Song ZJ, Xia HZ, Shen J. Situation analysis of medication among geriatric  
9 416 chronic disease. *Chin J New Drugs Clin Rem*. 2016;35:469-472.
- 10 417 [25] Su D, Chen YC, Gao HX, et al. Effect of integrated urban and rural residents medical  
11 418 insurance on the utilisation of medical services by residents in China: a propensity score  
12 419 matching with difference-in-differences regression approach. *BMJ Open*. 2019;9:e026408.
- 13 420 [26] Dou G, Wang Q, Ying X. Reducing the medical economic burden of health insurance in  
14 421 China: Achievements and challenges. *Biosci Trends*. 2018;12:215-219.
- 15 422 [27] Liu J, Chen H, Chen Y, et al. Exploring the relationship between migrants' purchasing of  
16 423 commercial medical insurance and urbanisation in China. *BMC Health Serv Res*.  
17 424 2018;18(1):679.
- 18 425 [28] Han J, Meng Y. Institutional differences and geographical disparity: the impact of  
19 426 medical insurance on the equity of health services utilization by the floating elderly population  
20 427 - evidence from China. *Int J Equity Health*. 2019;18(1):91.
- 21 428 [29] Kume A, Ohshiro T, Sakurada Y, et al. Treatment Patterns and Health Care Costs for  
22 429 Age-Related Macular Degeneration in Japan: An Analysis of National Insurance Claims Data.  
23 430 *Ophthalmology*. 2016;123(6):1263-1268.
- 24 431 [30] Ministry of Human Resources and Social Security of the People's Republic of China.  
25 432 Notice on the inclusion of 36 kinds of drugs in the Category B of the National Basic Medical  
26 433 Insurance, Employment Injury Insurance and Maternity Insurance Drug List. Available from:  
27 434 [http://www.mohrss.gov.cn/SYrlzyhshbzb/shehuibaozhang/zcwj/yiliao/201707/t20170718\\_2](http://www.mohrss.gov.cn/SYrlzyhshbzb/shehuibaozhang/zcwj/yiliao/201707/t20170718_274153.html)  
28 435 [74153.html](http://www.mohrss.gov.cn/SYrlzyhshbzb/shehuibaozhang/zcwj/yiliao/201707/t20170718_274153.html), accessed 3 July 2019.
- 29 436 [31] Lazcano-Gomez G, Ramos-Cadena ML, Torres-Tamayo M, et al. Cost of glaucoma  
30 437 treatment in a developing country over a 5-year period. *Medicine (Baltimore)*.  
31 438 2016;95(47):e5341.
- 32 439 [32] Brown MM, Brown GC, Stein JD, et al. Age-related macular degeneration: economic  
33 440 burden and value-based medicine analysis. *Can J Ophthalmol*. 2005;40:277-287.
- 34 441 [33] Wang X, Lamoureux E, Zheng Y, et al. Health burden associated with visual impairment  
35 442 in Singapore: the Singapore epidemiology of eye disease study. *Ophthalmology*.  
36 443 2014;121:1837-1842.
- 37 444 [34] Ong SY, Cheung CY, Li X, et al. Visual impairment, age-related eye diseases, and  
38 445 cognitive function: the Singapore Malay Eye study. *Arch Ophthalmol*. 2012;130:895-900.
- 39 446 [35] Briesen S, Roberts H, Finger RP. The impact of visual impairment on health-related  
40 447 quality of life in rural Africa. *Ophthalmic Epidemiol*. 2014;21(5):297-306.
- 41 448 [36] Brown MM, Brown GC, Sharma S, Landy J. Health care economic analyses and value-  
42 449 based medicine. *Surv Ophthalmol*. 2003;48:204-223.
- 43 450 [37] Lou L, Wang J, Xu P, et al. Socioeconomic Disparity in Global Burden of Cataract: An  
44 451 Analysis for 2013 With Time Trends Since 1990. *Am J Ophthalmol*. 2017;180:91-96.
- 45 452 [38] Kishimoto F, Naito T, Hasebe S, et al. Time trade-off utility analysis for surgical  
46 453 intervention in comitant strabismus, glaucoma, and cataract. *Acta Med Okayama*.  
47 454 2012;66(3):191-201..
- 48 455 [39] Bambara JK, Owsley C, Wadley V, et al. Family caregiver social problem-solving  
49 456 abilities and adjustment to caring for a relative with vision loss. *Invest Ophthalmol Vis Sci*.  
50 457 2009;50:1585-1592.
- 51  
52  
53  
54  
55  
56  
57  
58  
59  
60

458 **Table 1** General characteristics of sample visual impaired patients in 2015.

| Characteristics          | n (%)      | Outpatient visit | Inpatient visit | Hospital stay per visit (days) | Household income (USD) |
|--------------------------|------------|------------------|-----------------|--------------------------------|------------------------|
| <b>Total</b>             | <b>298</b> | <b>9.7</b>       | <b>0.6</b>      | <b>2.7</b>                     | <b>13,457.8</b>        |
| <b>Age</b>               |            |                  |                 |                                |                        |
| 19-50 years old          | 39 (13.1)  | 11.4             | 1.1             | 3.5                            | 12,696.0               |
| 51-70 years old          | 125 (41.9) | 10.8             | 0.6             | 2.6                            | 13,452.4               |
| 71-90 years old          | 134 (45.0) | 8.1              | 0.4             | 2.5                            | 13,684.4               |
| <b>Gender</b>            |            |                  |                 |                                |                        |
| Male                     | 142 (47.7) | 10.7             | 0.6             | 2.7                            | 14,408.2               |
| Female                   | 156 (52.3) | 8.8              | 0.5             | 2.7                            | 12,592.6               |
| <b>Ethnicity</b>         |            |                  |                 |                                |                        |
| Han                      | 278 (93.3) | 9.4              | 0.6             | 2.7                            | 12,788.9               |
| Minority                 | 20 (6.7)   | 13.9             | 0.7             | 2.1                            | 22,755.0               |
| <b>Educational level</b> |            |                  |                 |                                |                        |
| Primary and below        | 71 (23.8)  | 9.3              | 0.5             | 1.9                            | 6,945.0                |
| Middle and high school   | 159 (53.4) | 9.9              | 0.6             | 2.7                            | 13,853.7               |
| College and above        | 68 (22.8)  | 9.6              | 0.7             | 3.3                            | 19,332.0               |
| <b>Occupation *</b>      |            |                  |                 |                                |                        |
| Management personnel     | 32 (10.7)  | 12.1             | 0.8             | 2.3                            | 15,623.8               |
| Professional personnel   | 81 (27.2)  | 9.0              | 0.6             | 2.5                            | 16,599.2               |
| General staff            | 89 (29.9)  | 10.1             | 0.6             | 2.2                            | 14,206.2               |
| Farmer                   | 56 (18.8)  | 6.9              | 0.4             | 2.0                            | 4,707.6                |
| Other professions        | 11 (3.7)   | 14.0             | 0.5             | 2.9                            | 28,215.5               |
| Unemployed               | 29 (9.7)   | 7.7              | 1.0             | 3.1                            | 11,295.3               |
| <b>Marital status</b>    |            |                  |                 |                                |                        |
| Unmarried                | 44 (14.8)  | 5.0              | 0.8             | 2.4                            | 12,740.7               |

| Characteristics             | n (%)      | Outpatient visit | Inpatient visit | Hospital stay per visit (days) | Household income (USD) |
|-----------------------------|------------|------------------|-----------------|--------------------------------|------------------------|
| Married                     | 254 (85.2) | 10.5             | 0.5             | 2.7                            | 13,582.0               |
| <b>Living status</b>        |            |                  |                 |                                |                        |
| Alone                       | 16 (5.4)   | 7.9              | 0.6             | 5.6                            | 6,304.6                |
| With family                 | 282 (94.6) | 9.8              | 0.6             | 2.5                            | 13,863.6               |
| <b>Current living place</b> |            |                  |                 |                                |                        |
| Urban                       | 214 (71.8) | 9.7              | 0.6             | 2.7                            | 15,792.0               |
| Rural                       | 84 (28.2)  | 9.6              | 0.6             | 2.6                            | 7,511.1                |
| <b>Medical insurance †</b>  |            |                  |                 |                                |                        |
| None                        | 8 (2.7)    | 18.1             | 1.4             | 3                              | 18,299.2               |
| NCMS                        | 71 (23.8)  | 9.8              | 0.6             | 2.3                            | 15,099.4               |
| URBMI                       | 40 (13.4)  | 8.1              | 0.4             | 1.8                            | 11,345.5               |
| UEBMI                       | 123 (41.3) | 10.2             | 0.5             | 3.6                            | 6,333.6                |
| GMI                         | 42 (14.1)  | 7.9              | 0.5             | 1.8                            | 31,936.8               |
| CMI                         | 14 (4.7)   | 5.5              | 1.5             | 1.4                            | 4,249.6                |
| <b>level of VI</b>          |            |                  |                 |                                |                        |
| Moderate VI                 | 174 (58.4) | 9.7              | 0.4             | 1.8                            | 15,021.5               |
| Severe VI                   | 86 (28.9)  | 9.6              | 0.7             | 3.5                            | 12,308.5               |
| Blind                       | 38 (12.8)  | 10.0             | 1.2             | 4.7                            | 8,898.5                |
| <b>Duration of VI ‡</b>     |            |                  |                 |                                |                        |
| 3-6 months                  | 36 (12.1)  | 4.6              | 0.4             | 1.3                            | 12,948.3               |
| 6-12 months                 | 48 (16.1)  | 7.5              | 0.5             | 2.8                            | 9,755.8                |
| More than 12 months         | 214 (71.8) | 11.1             | 0.6             | 2.9                            | 14,373.8               |
| <b>Cause of VI</b>          |            |                  |                 |                                |                        |
| Cataract                    | 80 (26.8)  | 4.8              | 0.3             | 1.5                            | 10,898.1               |
| AMD                         | 35 (11.7)  | 12.1             | 0.3             | 1.4                            | 12,185.9               |
| Vascular retinopathy        | 27 (9.1)   | 8.9              | 0.9             | 2.1                            | 14,326.4               |



| Characteristics          | n (%)     | Outpatient visit | Inpatient visit | Hospital stay per visit (days) | Household income (USD) |
|--------------------------|-----------|------------------|-----------------|--------------------------------|------------------------|
| Glaucoma                 | 17 (5.7)  | 16.7             | 1.2             | 6.2                            | 17,850.1               |
| Other eye diseases       | 60 (20.1) | 10.1             | 0.6             | 2.6                            | 11,511.3               |
| Multiple ocular diseases | 79 (26.5) | 12.0             | 0.7             | 3.8                            | 16,849.5               |
| <b>Economic status §</b> |           |                  |                 |                                |                        |
| Lowest                   | 59 (19.8) | 10.0             | 0.6             | 2.3                            | 2,445.9                |
| Lower                    | 59 (19.8) | 7.7              | 0.8             | 3.9                            | 6,464.2                |
| Middle                   | 60 (20.1) | 8.3              | 0.5             | 3.3                            | 10,890.3               |
| Higher                   | 60 (20.1) | 14.2             | 0.5             | 1.4                            | 15,481.5               |
| Highest                  | 60 (20.1) | 8.4              | 0.6             | 2.4                            | 32,134.7               |

\* Occupation included current profession of unretired participants and former profession for the retired. Professional personnel were professional and technical personnel, i.e. teachers, doctors, lawyers, engineer among others.

† Public insurance included new cooperative medical scheme in rural area (NCMS), urban employee basic medical insurance (UEBMI), urban resident basic medical insurance (URBMI) and Government medical insurance (GMI). NCMS was insurance for rural residents, UEBMI was for urban employees of urban enterprises, and URBMI was for those who were not employed or flexible employees and children with urban household registration, students of urban schools, and rural migrants who worked in cities. GMI, also called publicly-funded free medical care, was insurance for some of the civil servants and personnel at public institutions. Commercial medical insurance (CMI) was supplements of public medical insurance, purchased by respondents' employers or by themselves from insurance company.

‡ Duration of VI was defined by the period from the time which the participants became their current visual impaired level.

§ Economic status was divided into five equal intervals based on household income per capita of the study participants. Lowest US\$[60.7, 1274.9]; Lower US\$[1365.9, 2428.3]; Middle US\$[2529.5, 4097.8]; Higher US\$[4249.6, 6677.9]; Highest US\$[7183.8, 37942.6].

**Table 2** Annual direct costs of Chinese patients with visual impairment associated with ocular diseases.

| Characteristics               | Mean (USD) | Median (USD) | Max (USD) | Min (USD) | Proportion (%) |
|-------------------------------|------------|--------------|-----------|-----------|----------------|
| <b>Direct medical costs *</b> |            |              |           |           | <b>70.3</b>    |
| <b>Outpatient costs</b>       |            |              |           |           | 69.4           |
| Total                         | 3,408.5    | 607.1        | 68,296.7  | 0.0       |                |
| Drug                          | 2,352.7    | 215.5        | 54,637.3  | 0.0       |                |
| Out-of-pocket                 | 3,048.5    | 324.8        | 68,296.7  | 0.0       |                |
| <b>Inpatient costs</b>        |            |              |           |           | 27.9           |
| Total                         | 1,369.5    | 0.0          | 31,871.8  | 0.0       |                |
| Drug                          | 408.8      | 0.0          | 12,748.7  | 0.0       |                |

|                                       |                |                |                  |             |              |
|---------------------------------------|----------------|----------------|------------------|-------------|--------------|
| Out-of-pocket                         | 1,034.8        | 0.0            | 31,871.8         | 0.0         |              |
| <b>Self-purchased drugs costs</b>     |                |                |                  |             | <b>2.7</b>   |
| Total                                 | 131.8          | 0.0            | 4,553.1          | 0.0         |              |
| Out-of-pocket                         | 128.3          | 0.0            | 4,553.1          | 0.0         |              |
| <b>Total direct medical costs</b>     | <b>4,909.8</b> | <b>1,517.7</b> | <b>70,573.2</b>  | <b>0.0</b>  | <b>100.0</b> |
| <b>Direct non-medical costs</b>       |                |                |                  |             | <b>29.7</b>  |
| Long-term home care                   | 1,216.6        | 0.0            | 28,836.4         | 0.0         | 58.5         |
| Transportation                        | 149.8          | 15.2           | 5,463.7          | 0.0         | 7.2          |
| Food or accommodation                 | 176.8          | 0.0            | 9,106.2          | 0.0         | 8.5          |
| Escort †                              | 161.1          | 15.2           | 6,677.9          | 0.0         | 7.7          |
| Nutrition or assistive devices        | 277.1          | 0.0            | 4,629.0          | 0.0         | 13.3         |
| Home modifications                    | 97.5           | 0.0            | 6,070.8          | 0.0         | 4.7          |
| <b>Total direct non-medical costs</b> | <b>2,078.8</b> | <b>440.1</b>   | <b>33,237.7</b>  | <b>0.0</b>  | <b>100.0</b> |
| <b>Total direct costs</b>             | <b>6,988.6</b> | <b>2,281.8</b> | <b>101,079.1</b> | <b>45.5</b> | <b>100.0</b> |

\* Direct medical costs measured the cost of resources used for treating a particular illness and consisted of outpatient costs, inpatient costs and self-purchased drugs costs. Outpatient costs were vision-related medical costs during outpatient visits, including registration fee, medical service fee, treatment fee, examination fee, drug expenses, medical supply expenses, etc. Inpatient costs were vision-related medical costs during hospitalization, including medical service fee, treatment fee, examination fee, surgery fee, drug expenses, medical supply expenses, etc. Expenditures of medicine prescribed and purchased during outpatient and inpatient visits in hospitals were included in outpatient and inpatient drug costs, respectively. The cost of self-purchased drugs was the expense of the drugs that patients bought in pharmacies (not in hospitals) for their ocular disease treatment after the initial diagnosis.

† Cost of escort were meals, transport and accommodation costs encountered by patients' escorts during all outpatient or inpatient visits.

**Table 3** Reimbursement rate, proportion of CHE and QoL by related characteristics.

| Characteristics    | Reimbursement rate (%)* |            |            |             | CHE            |          | QoL         |          |
|--------------------|-------------------------|------------|------------|-------------|----------------|----------|-------------|----------|
|                    | Outpatient              | Inpatient  | SPD        | Total       | Proportion (%) | <i>p</i> | Mean        | <i>p</i> |
| <b>Total</b>       | <b>28.1</b>             | <b>9.5</b> | <b>2.7</b> | <b>26.9</b> | <b>32.2</b>    |          | <b>0.65</b> |          |
| <b>Level of VI</b> |                         |            |            |             |                |          |             |          |
| Moderate VI        | 29.9                    | 6.4        | 2.9        | 28.1        | 28.2           | 0.014    | 0.69        | 0.001    |
| Severe VI          | 26.9                    | 14.8       | 2.9        | 27.0        | 31.4           |          | 0.65        |          |
| Blind              | 22.2                    | 11.7       | 1.4        | 21.4        | 52.6           |          | 0.49        |          |
| <b>Cause of VI</b> |                         |            |            |             |                |          |             |          |
| Cataract           | 29.5                    | 4.3        | 2.3        | 26.7        | 17.5           | 0.010    | 0.76        | 0.000    |
| AMD                | 26.9                    | 7.6        | 0.6        | 23.9        | 51.4           |          | 0.72        |          |

| Characteristics             | Reimbursement rate (%)* |           |     |       | CHE            |          | QoL  |          |
|-----------------------------|-------------------------|-----------|-----|-------|----------------|----------|------|----------|
|                             | Outpatient              | Inpatient | SPD | Total | Proportion (%) | <i>p</i> | Mean | <i>p</i> |
| Vascular retinopathy        | 24.8                    | 9.4       | 1.7 | 25.2  | 37.0           |          | 0.67 |          |
| Glaucoma                    | 32.4                    | 19.7      | 0.0 | 24.8  | 41.2           |          | 0.64 |          |
| Other eye diseases          | 22.2                    | 6.8       | 5.1 | 23.5  | 31.7           |          | 0.59 |          |
| Multiple ocular diseases    | 31.7                    | 15.5      | 3.2 | 32.1  | 35.4           |          | 0.56 |          |
| <b>Current living place</b> |                         |           |     |       |                |          |      |          |
| Urban                       | 30.9                    | 15.0      | 5.9 | 33.5  | 26.2           | 0.000    | 0.67 | 0.450    |
| Rural                       | 27.9                    | 9.2       | 2.5 | 26.5  | 47.6           |          | 0.62 |          |
| <b>Medical insurance</b>    |                         |           |     |       |                |          |      |          |
| None                        | 0.0                     | 0.0       | 0.0 | 0.0   | 50.0           | 0.008    | 0.64 | 0.003    |
| NCMS                        | 14.2                    | 4.9       | 2.3 | 13.9  | 47.9           |          | 0.63 |          |
| URBMI                       | 24.2                    | 6.9       | 4.3 | 21.6  | 25.0           |          | 0.81 |          |
| UEBMI                       | 35.7                    | 11.3      | 2.1 | 33.5  | 30.9           |          | 0.63 |          |
| GMI                         | 38.5                    | 14.5      | 2.6 | 38.0  | 16.7           |          | 0.66 |          |
| CMI                         | 26.8                    | 15.4      | 7.1 | 31.4  | 21.4           |          | 0.49 |          |
| <b>Economic status</b>      |                         |           |     |       |                |          |      |          |
| Lowest                      | 15.0                    | 4.7       | 3.1 | 14.7  | 54.2           | 0.001    | 0.59 | 0.559    |
| Lower                       | 25.4                    | 12.2      | 2.5 | 23.3  | 33.9           |          | 0.66 |          |
| Middle                      | 28.7                    | 8.3       | 2.9 | 31.3  | 26.7           |          | 0.68 |          |
| Higher                      | 31.7                    | 7.0       | 0.0 | 27.2  | 21.7           |          | 0.73 |          |
| Highest                     | 39.3                    | 15.4      | 4.9 | 38.0  | 25.0           |          | 0.62 |          |

\* Medical insurance reimbursement rate in our study was the percent of the whole year costs that is covered by insurance.

† Abbreviations: SPD, self-purchased drugs costs; CHE, catastrophic healthcare expenditure; QoL, quality of life; NCMS, new cooperative medical scheme; UEBMI, urban employee basic medical insurance; URBMI, urban resident basic medical insurance; GMI, government medical insurance; CMI, commercial medical insurance.

## Supplementary File

### Burden of visual impairment associated with eye diseases: an exploratory survey of 298 Chinese patients

#### Appendix 1 The items of the survey questionnaire.

| Variable name                            | Description                                                                                        |
|------------------------------------------|----------------------------------------------------------------------------------------------------|
| <b>Sociodemographic information</b>      |                                                                                                    |
| age                                      | [19,50], [51,70], [71,90]                                                                          |
| gender                                   | Male, Female                                                                                       |
| ethnicity                                | Han, Minority                                                                                      |
| educational level                        | Primary and below, Middle and high school, College and above                                       |
| Occupation *                             | Management personnel, Professional personnel, General staff, Farmer, Other professions, Unemployed |
| marital status                           | Unmarried, Married                                                                                 |
| living status                            | Alone, With family                                                                                 |
| current living place                     | Urban, Rural                                                                                       |
| medical insurance †                      | None, NCMS, URBMI, UEBMI, GMI, CMI,                                                                |
| personal income                          | Continuous                                                                                         |
| household size                           | Continuous                                                                                         |
| household income                         | Continuous                                                                                         |
| <b>Clinic-related information</b>        |                                                                                                    |
| level of visual impairment               | moderate VI , severe VI , blind                                                                    |
| Duration of visual impairment ‡          | 3-6 months, 6-12 months, More than 12 months                                                       |
| Cause of visual impairment               | Cataract, AMD, Vascular retinopathy, Glaucoma, Other eye diseases, Multiple ocular diseases        |
| Outpatient visit                         | Continuous                                                                                         |
| Inpatient visit                          | Continuous                                                                                         |
| Hospital stay per visit                  | Continuous                                                                                         |
| <b>Economic burden</b>                   |                                                                                                    |
| <b>Direct medical costs §</b>            |                                                                                                    |
| Outpatient costs                         | Continuous                                                                                         |
| Outpatient drug costs                    | Continuous                                                                                         |
| Outpatient out-of-pocket costs           | Continuous                                                                                         |
| Inpatient costs                          | Continuous                                                                                         |
| Inpatient drug costs                     | Continuous                                                                                         |
| Inpatient out-of-pocket costs            | Continuous                                                                                         |
| Self-purchased drugs costs               | Continuous                                                                                         |
| Self-purchased drugs out-of-pocket costs | Continuous                                                                                         |
| <b>Direct non-medical costs</b>          |                                                                                                    |
| Long-term home care costs                | Continuous                                                                                         |
| Transportation costs                     | Continuous                                                                                         |
| Food or accommodation costs              | Continuous                                                                                         |
| Escort costs                             | Continuous                                                                                         |
| Nutrition or assistive devices costs     | Continuous                                                                                         |
| Home modifications                       | Continuous                                                                                         |
| <b>Quality of life</b>                   | Continuous                                                                                         |

\* Occupation included current profession of unretired participants and former profession for the retired. Professional personnel were professional and technical personnel, i.e. teachers, doctors, lawyers, engineer, etc.

† Public insurance included new cooperative medical scheme in rural area (NCMS), urban employee basic medical insurance (UEBMI), urban resident basic medical insurance (URBMI) and government medical insurance (GMI). Commercial medical insurance (CMI) was supplements of public medical insurance purchased by respondents' employers or by themselves.

‡ Duration of VI was defined by the period from the time which the participants became their current visual impaired level.

§ Direct medical costs measured the cost of resources used for treating a particular illness, consisted of outpatient costs, inpatient costs and self-purchased drugs costs. Expenditures for medicine prescribed and purchased during outpatient and inpatient visits in hospitals were included in outpatient and inpatient drug costs, respectively. The cost of self-purchased drugs was the expense of the drugs that patients bought in pharmacies (not in hospitals) for their ocular disease treatment after the initial diagnosis.

|| Cost of escort were meals, transport and accommodation costs encountered by patients' escorts during all outpatient or inpatient visits.

## Supplementary File

## Burden of visual impairment associated with eye diseases: an exploratory survey of 298 Chinese patients

## Appendix 2 Annual direct costs of different visual impaired patients in China.

| Characteristics          | Direct medical costs (USD) |                |                      |                | Direct non-medical costs (USD) |                |                       |              |                                |                    |                | Total direct costs (USD) |
|--------------------------|----------------------------|----------------|----------------------|----------------|--------------------------------|----------------|-----------------------|--------------|--------------------------------|--------------------|----------------|--------------------------|
|                          | Outpatient                 | Inpatient      | Self-purchased drugs | Total          | Long-term home care            | Transportation | Food or accommodation | Escort       | Nutrition or assistive devices | Home modifications | Total          |                          |
| <b>Total</b>             | <b>3,408.5</b>             | <b>1,369.5</b> | <b>131.8</b>         | <b>4,909.8</b> | <b>1,216.6</b>                 | <b>149.8</b>   | <b>176.7</b>          | <b>161.1</b> | <b>277.1</b>                   | <b>97.5</b>        | <b>2,078.8</b> | <b>6,988.6</b>           |
| <b>Age</b>               |                            |                |                      |                |                                |                |                       |              |                                |                    |                |                          |
| 19-50 years old          | 2,009.3                    | 3,572.4        | 211.5                | 5,793.2        | 1,269.1                        | 248.1          | 407.7                 | 249.6        | 77.8                           | 43.2               | 2,295.5        | 8,088.7                  |
| 51-70 years old          | 3,479.0                    | 1,062.6        | 156.3                | 4,697.9        | 963.7                          | 161.1          | 216.6                 | 178.5        | 226.3                          | 75.3               | 1,821.6        | 6,519.6                  |
| 71-90 years old          | 3,749.9                    | 1,014.6        | 85.8                 | 4,850.3        | 1,437.2                        | 110.6          | 72.4                  | 119.1        | 382.4                          | 134.0              | 2,255.7        | 7,106.0                  |
| <b>Gender</b>            |                            |                |                      |                |                                |                |                       |              |                                |                    |                |                          |
| Male                     | 3,321.3                    | 1,860.7        | 98.6                 | 5,280.6        | 1,069.2                        | 130.7          | 132.7                 | 179.2        | 300.4                          | 118.4              | 1,930.6        | 7,211.2                  |
| Female                   | 3,487.8                    | 922.4          | 162.0                | 4,572.3        | 1,350.8                        | 167.2          | 216.9                 | 144.6        | 255.8                          | 78.5               | 2,213.8        | 6,786.0                  |
| <b>Ethnicity</b>         |                            |                |                      |                |                                |                |                       |              |                                |                    |                |                          |
| Han                      | 3,404.2                    | 1,325.0        | 130.2                | 4,859.4        | 1,039.7                        | 135.5          | 166.1                 | 167.0        | 250.6                          | 86.5               | 1,845.5        | 6,704.8                  |
| Minority                 | 3,468.1                    | 1,988.2        | 154.7                | 5,611.0        | 3,675.2                        | 348.7          | 324.7                 | 78.2         | 645.0                          | 250.4              | 5,322.3        | 10,933.2                 |
| <b>Educational level</b> |                            |                |                      |                |                                |                |                       |              |                                |                    |                |                          |
| Primary and below        | 2,924.6                    | 991.6          | 85.3                 | 4,001.6        | 2,331.9                        | 173.9          | 138.3                 | 96.1         | 146.7                          | 51.3               | 2,938.2        | 6,939.8                  |
| Middle and high school   | 3,894.0                    | 1,440.2        | 174.5                | 5,508.7        | 887.0                          | 134.9          | 163.0                 | 210.6        | 237.4                          | 117.8              | 1,750.8        | 7,259.6                  |
| College and above        | 2,778.4                    | 1,598.7        | 80.5                 | 4,457.7        | 822.8                          | 159.4          | 248.9                 | 113.2        | 505.8                          | 98.3               | 1,948.5        | 6,406.2                  |
| <b>Occupation</b>        |                            |                |                      |                |                                |                |                       |              |                                |                    |                |                          |
| Management personnel     | 5,325.1                    | 2,859.9        | 131.6                | 8,316.6        | 840.4                          | 125.8          | 115.9                 | 149.4        | 274.8                          | 38.4               | 1,544.7        | 9,861.3                  |
| Professional personnel   | 3,924.7                    | 1,129.7        | 137.3                | 5,191.6        | 1,035.5                        | 182.0          | 281.2                 | 207.9        | 503.9                          | 111.5              | 2,322.1        | 7,513.7                  |
| General staff            | 2,751.8                    | 1,414.9        | 97.5                 | 4,264.1        | 1,592.0                        | 156.1          | 136.3                 | 97.0         | 211.6                          | 109.5              | 2,302.4        | 6,566.5                  |
| Farmer                   | 3,246.6                    | 483.0          | 137.8                | 3,867.3        | 1,036.3                        | 128.3          | 141.2                 | 147.0        | 127.0                          | 32.6               | 1,612.5        | 5,479.8                  |
| Other professions        | 2,467.8                    | 2,635.3        | 146.8                | 5,249.9        | 2,731.9                        | 172.9          | 242.8                 | 226.6        | 531.3                          | 275.9              | 4,181.6        | 9,431.4                  |
| Unemployed               | 2,536.8                    | 1,487.3        | 204.9                | 4,229.1        | 758.8                          | 100.0          | 119.8                 | 242.1        | 40.4                           | 144.4              | 1,405.7        | 5,634.8                  |
| <b>Marital status</b>    |                            |                |                      |                |                                |                |                       |              |                                |                    |                |                          |
| Unmarried                | 869.9                      | 1,715.0        | 172.2                | 2,757.1        | 1,922.0                        | 78.0           | 59.7                  | 71.5         | 120.7                          | 79.4               | 2,331.4        | 5,088.5                  |
| Married                  | 3,848.2                    | 1,309.6        | 124.8                | 5,282.7        | 1,094.4                        | 162.2          | 197.0                 | 176.6        | 304.2                          | 100.6              | 2,035.1        | 7,317.8                  |
| <b>Living status</b>     |                            |                |                      |                |                                |                |                       |              |                                |                    |                |                          |
| Alone                    | 1,546.6                    | 1,218.0        | 138.6                | 2,903.2        | 1,015.9                        | 82.9           | 39.2                  | 126.8        | 158.1                          | 95.8               | 1,518.7        | 4,422.0                  |
| With family              | 3,514.1                    | 1,378.1        | 131.4                | 5,023.6        | 1,228.0                        | 153.6          | 184.6                 | 163.0        | 283.8                          | 97.6               | 2,110.6        | 7,134.3                  |

| Characteristics          | Direct medical costs (USD) |           |                      |         | Direct non-medical costs (USD) |                |                       |        |                                |                    |         | Total direct costs (USD) |
|--------------------------|----------------------------|-----------|----------------------|---------|--------------------------------|----------------|-----------------------|--------|--------------------------------|--------------------|---------|--------------------------|
|                          | Outpatient                 | Inpatient | Self-purchased drugs | Total   | Long-term home care            | Transportation | Food or accommodation | Escort | Nutrition or assistive devices | Home modifications | Total   |                          |
| <b>Current residence</b> |                            |           |                      |         |                                |                |                       |        |                                |                    |         |                          |
| Urban                    | 3,463.3                    | 1,411.9   | 105.2                | 4,980.5 | 1,347.2                        | 143.6          | 176.7                 | 136.5  | 319.9                          | 111.6              | 2,235.7 | 7,216.1                  |
| Rural                    | 3,268.7                    | 1,261.5   | 199.5                | 4,729.8 | 883.8                          | 165.5          | 176.9                 | 223.8  | 167.8                          | 61.5               | 1,679.8 | 6,409.1                  |
| <b>Medical insurance</b> |                            |           |                      |         |                                |                |                       |        |                                |                    |         |                          |
| None                     | 298.9                      | 4,249.6   | 202.1                | 4,750.5 | 4,078.8                        | 192.6          | 147.0                 | 180.2  | 154.5                          | 151.8              | 4,905.0 | 9,655.5                  |
| NCMS                     | 3,488.4                    | 1,208.2   | 209.3                | 4,905.9 | 881.5                          | 156.2          | 173.2                 | 233.0  | 96.9                           | 42.8               | 1,583.8 | 6,489.6                  |
| URBMI                    | 3,258.8                    | 359.3     | 65.0                 | 3,683.1 | 1,061.2                        | 71.0           | 23.5                  | 86.2   | 103.0                          | 25.0               | 1,370.0 | 5,053.1                  |
| UEBMI                    | 3,351.3                    | 1,658.9   | 123.1                | 5,133.3 | 1,251.4                        | 181.4          | 225.9                 | 115.2  | 326.5                          | 112.1              | 2,212.4 | 7,345.7                  |
| GMI                      | 3,924.8                    | 1,368.5   | 92.1                 | 5,385.3 | 1,585.7                        | 128.4          | 183.4                 | 252.0  | 500.4                          | 195.1              | 2,845.0 | 8,230.3                  |
| CMI                      | 4,160.8                    | 888.9     | 85.7                 | 5,135.4 | 311.7                          | 104.2          | 197.8                 | 130.1  | 653.7                          | 130.1              | 1,527.6 | 6,663.0                  |
| <b>level of VI</b>       |                            |           |                      |         |                                |                |                       |        |                                |                    |         |                          |
| Moderate VI              | 3,120.7                    | 853.8     | 118.6                | 4,093.1 | 916.4                          | 142.4          | 138.5                 | 125.9  | 222.0                          | 65.3               | 1,610.4 | 5,703.5                  |
| Severe VI                | 4,479.9                    | 1,694.5   | 147.5                | 6,321.8 | 1,793.8                        | 158.7          | 226.7                 | 128.2  | 293.3                          | 137.0              | 2,737.6 | 9,059.5                  |
| Blind                    | 2,301.6                    | 2,995.5   | 156.8                | 5,453.9 | 1,284.8                        | 163.9          | 238.9                 | 396.6  | 492.7                          | 155.8              | 2,732.6 | 8,186.5                  |
| <b>duration of VI</b>    |                            |           |                      |         |                                |                |                       |        |                                |                    |         |                          |
| 3-6 months               | 1,574.8                    | 503.8     | 225.0                | 2,303.6 | 1,643.7                        | 103.1          | 89.4                  | 110.6  | 308.8                          | 123.5              | 2,379.2 | 4,682.7                  |
| 6-12 months              | 2,182.5                    | 1,070.6   | 70.9                 | 3,324.0 | 429.4                          | 152.8          | 282.8                 | 104.2  | 104.5                          | 85.4               | 1,159.1 | 4,483.0                  |
| More than 12 months      | 3,992.0                    | 1,582.2   | 129.8                | 5,703.9 | 1,321.3                        | 157.0          | 167.6                 | 182.4  | 310.4                          | 95.9               | 2,234.6 | 7,938.6                  |
| <b>Cause of VI</b>       |                            |           |                      |         |                                |                |                       |        |                                |                    |         |                          |
| Cataract                 | 1,236.9                    | 583.9     | 27.5                 | 1,848.3 | 790.1                          | 55.1           | 67.7                  | 48.4   | 63.2                           | 19.4               | 1,043.7 | 2,892.0                  |
| AMD                      | 8,162.3                    | 524.7     | 134.8                | 8,821.8 | 346.9                          | 189.3          | 172.0                 | 174.6  | 480.9                          | 0.0                | 1,363.7 | 10,185.5                 |
| Vascular retinopathy     | 4,151.1                    | 2,270.9   | 249.9                | 6,671.9 | 930.5                          | 139.1          | 84.9                  | 141.1  | 237.9                          | 194.2              | 1,727.8 | 8,399.7                  |
| Glaucoma                 | 4,909.7                    | 2,297.1   | 208.0                | 7,414.8 | 380.0                          | 78.6           | 100.9                 | 102.7  | 118.7                          | 35.7               | 816.6   | 8,231.4                  |
| Other eye diseases       | 1,656.8                    | 2,350.2   | 180.2                | 4,187.1 | 1,781.2                        | 278.0          | 414.6                 | 203.0  | 145.3                          | 76.4               | 2,898.5 | 7,085.7                  |
| Multiple ocular diseases | 4,255.0                    | 1,286.8   | 142.7                | 5,684.5 | 1,882.8                        | 149.8          | 156.4                 | 256.8  | 550.9                          | 216.2              | 3,212.9 | 8,897.5                  |
| <b>Economic status</b>   |                            |           |                      |         |                                |                |                       |        |                                |                    |         |                          |
| Lowest                   | 3,662.3                    | 1,342.8   | 177.1                | 5,182.2 | 1,523.5                        | 254.6          | 315.7                 | 294.5  | 173.4                          | 36.0               | 2,597.8 | 7,780.0                  |
| Lower                    | 1,996.4                    | 1,738.2   | 95.0                 | 3,829.6 | 479.0                          | 174.2          | 295.0                 | 158.1  | 200.8                          | 54.9               | 1,362.1 | 5,191.7                  |
| Middle                   | 2,614.7                    | 1,345.7   | 142.5                | 4,102.9 | 1,196.1                        | 94.0           | 37.3                  | 77.9   | 220.6                          | 76.1               | 1,702.0 | 5,804.9                  |
| Higher                   | 4,761.2                    | 934.9     | 114.9                | 5,811.0 | 800.9                          | 84.0           | 49.2                  | 108.5  | 250.0                          | 5.0                | 1,297.7 | 7,108.7                  |
| Highest                  | 3,988.4                    | 1,491.6   | 129.7                | 5,609.8 | 2076.3                         | 144.4          | 190.8                 | 168.6  | 537.5                          | 313.7              | 3,431.3 | 9,041.1                  |

\* Abbreviations: NCMS, new cooperative medical scheme; UEBMI, urban employee basic medical insurance; URBMI, urban resident basic medical insurance; GMI, government medical insurance; CMI, commercial medical insurance.

STROBE Statement—Checklist of items that should be included in reports of *cross-sectional studies*

|                              | Item No | Recommendation                                                                                                                                                                                               | Page No |
|------------------------------|---------|--------------------------------------------------------------------------------------------------------------------------------------------------------------------------------------------------------------|---------|
| <b>Title and abstract</b>    | 1       | (a) Indicate the study's design with a commonly used term in the title or the abstract                                                                                                                       | 1       |
|                              |         | (b) Provide in the abstract an informative and balanced summary of what was done and what was found                                                                                                          | 2       |
| <b>Introduction</b>          |         |                                                                                                                                                                                                              |         |
| Background/rationale         | 2       | Explain the scientific background and rationale for the investigation being reported                                                                                                                         | 4       |
| Objectives                   | 3       | State specific objectives, including any prespecified hypotheses                                                                                                                                             | 4       |
| <b>Methods</b>               |         |                                                                                                                                                                                                              |         |
| Study design                 | 4       | Present key elements of study design early in the paper                                                                                                                                                      | 4       |
| Setting                      | 5       | Describe the setting, locations, and relevant dates, including periods of recruitment, exposure, follow-up, and data collection                                                                              | 5       |
| Participants                 | 6       | (a) Give the eligibility criteria, and the sources and methods of selection of participants                                                                                                                  | 5       |
| Variables                    | 7       | Clearly define all outcomes, exposures, predictors, potential confounders, and effect modifiers. Give diagnostic criteria, if applicable                                                                     | 6       |
| Data sources/<br>measurement | 8*      | For each variable of interest, give sources of data and details of methods of assessment (measurement). Describe comparability of assessment methods if there is more than one group                         | 6       |
| Bias                         | 9       | Describe any efforts to address potential sources of bias                                                                                                                                                    | 6       |
| Study size                   | 10      | Explain how the study size was arrived at                                                                                                                                                                    | 5       |
| Quantitative variables       | 11      | Explain how quantitative variables were handled in the analyses. If applicable, describe which groupings were chosen and why                                                                                 | 6       |
| Statistical methods          | 12      | (a) Describe all statistical methods, including those used to control for confounding                                                                                                                        | 6-7     |
|                              |         | (b) Describe any methods used to examine subgroups and interactions                                                                                                                                          | 6-7     |
|                              |         | (c) Explain how missing data were addressed                                                                                                                                                                  | /       |
|                              |         | (d) If applicable, describe analytical methods taking account of sampling strategy                                                                                                                           | /       |
|                              |         | (e) Describe any sensitivity analyses                                                                                                                                                                        | /       |
| <b>Results</b>               |         |                                                                                                                                                                                                              |         |
| Participants                 | 13*     | (a) Report numbers of individuals at each stage of study—eg numbers potentially eligible, examined for eligibility, confirmed eligible, included in the study, completing follow-up, and analysed            | 7       |
|                              |         | (b) Give reasons for non-participation at each stage                                                                                                                                                         | 7       |
|                              |         | (c) Consider use of a flow diagram                                                                                                                                                                           | /       |
| Descriptive data             | 14*     | (a) Give characteristics of study participants (eg demographic, clinical, social) and information on exposures and potential confounders                                                                     | 7       |
|                              |         | (b) Indicate number of participants with missing data for each variable of interest                                                                                                                          | /       |
| Outcome data                 | 15*     | Report numbers of outcome events or summary measures                                                                                                                                                         | 7-9     |
| Main results                 | 16      | (a) Give unadjusted estimates and, if applicable, confounder-adjusted estimates and their precision (eg, 95% confidence interval). Make clear which confounders were adjusted for and why they were included | /       |

|                          |    |                                                                                                                                                                            |       |
|--------------------------|----|----------------------------------------------------------------------------------------------------------------------------------------------------------------------------|-------|
|                          |    | (b) Report category boundaries when continuous variables were categorized                                                                                                  | 15-17 |
|                          |    | (c) If relevant, consider translating estimates of relative risk into absolute risk for a meaningful time period                                                           | /     |
| Other analyses           | 17 | Report other analyses done—eg analyses of subgroups and interactions, and sensitivity analyses                                                                             | 18-19 |
| <b>Discussion</b>        |    |                                                                                                                                                                            |       |
| Key results              | 18 | Summarise key results with reference to study objectives                                                                                                                   | 9     |
| Limitations              | 19 | Discuss limitations of the study, taking into account sources of potential bias or imprecision. Discuss both direction and magnitude of any potential bias                 | 11    |
| Interpretation           | 20 | Give a cautious overall interpretation of results considering objectives, limitations, multiplicity of analyses, results from similar studies, and other relevant evidence | 9-11  |
| Generalisability         | 21 | Discuss the generalisability (external validity) of the study results                                                                                                      | /     |
| <b>Other information</b> |    |                                                                                                                                                                            |       |
| Funding                  | 22 | Give the source of funding and the role of the funders for the present study and, if applicable, for the original study on which the present article is based              | 12    |

\*Give information separately for exposed and unexposed groups.

**Note:** An Explanation and Elaboration article discusses each checklist item and gives methodological background and published examples of transparent reporting. The STROBE checklist is best used in conjunction with this article (freely available on the Web sites of PLoS Medicine at <http://www.plosmedicine.org/>, Annals of Internal Medicine at <http://www.annals.org/>, and Epidemiology at <http://www.epidem.com/>). Information on the STROBE Initiative is available at [www.strobe-statement.org](http://www.strobe-statement.org).
