# Supplementary material for: Burden of visual impairment associated with eye diseases: exploratory survey of 298 Chinese patients
Source: PubMed Central journal article supplement — BMJ Open. 2019 Sep 12;9(9):e030561. doi: 10.1136/bmjopen-2019-030561 (PMC6747637; doi:10.1136/bmjopen-2019-030561), 2019-09-12
Supplement: bmjopen-2019-030561supp001.pdf [file bmjopen-2019-030561supp001.pdf]

## Supplementary File

### Burden of visual impairment associated with eye diseases: an exploratory survey of 298 Chinese patients

#### Appendix 1 The items of the survey questionnaire.

| Variable name                            | Description                                                                                        |
|------------------------------------------|----------------------------------------------------------------------------------------------------|
| <b>Sociodemographic information</b>      |                                                                                                    |
| age                                      | [19,50], [51,70], [71,90]                                                                          |
| gender                                   | Male, Female                                                                                       |
| ethnicity                                | Han, Minority                                                                                      |
| educational level                        | Primary and below, Middle and high school, College and above                                       |
| Occupation *                             | Management personnel, Professional personnel, General staff, Farmer, Other professions, Unemployed |
| marital status                           | Unmarried, Married                                                                                 |
| living status                            | Alone, With family                                                                                 |
| current living place                     | Urban, Rural                                                                                       |
| medical insurance †                      | None, NCMS, URBMI, UEBMI, GMI, CMI,                                                                |
| personal income                          | Continuous                                                                                         |
| household size                           | Continuous                                                                                         |
| household income                         | Continuous                                                                                         |
| <b>Clinic-related information</b>        |                                                                                                    |
| level of visual impairment               | moderate VI , severe VI , blind                                                                    |
| Duration of visual impairment ‡          | 3-6 months, 6-12 months, More than 12 months                                                       |
| Cause of visual impairment               | Cataract, AMD, Vascular retinopathy, Glaucoma, Other eye diseases, Multiple ocular diseases        |
| Outpatient visit                         | Continuous                                                                                         |
| Inpatient visit                          | Continuous                                                                                         |
| Hospital stay per visit                  | Continuous                                                                                         |
| <b>Economic burden</b>                   |                                                                                                    |
| <b>Direct medical costs §</b>            |                                                                                                    |
| Outpatient costs                         | Continuous                                                                                         |
| Outpatient drug costs                    | Continuous                                                                                         |
| Outpatient out-of-pocket costs           | Continuous                                                                                         |
| Inpatient costs                          | Continuous                                                                                         |
| Inpatient drug costs                     | Continuous                                                                                         |
| Inpatient out-of-pocket costs            | Continuous                                                                                         |
| Self-purchased drugs costs               | Continuous                                                                                         |
| Self-purchased drugs out-of-pocket costs | Continuous                                                                                         |
| <b>Direct non-medical costs</b>          |                                                                                                    |
| Long-term home care costs                | Continuous                                                                                         |
| Transportation costs                     | Continuous                                                                                         |
| Food or accommodation costs              | Continuous                                                                                         |
| Escort costs                             | Continuous                                                                                         |
| Nutrition or assistive devices costs     | Continuous                                                                                         |
| Home modifications                       | Continuous                                                                                         |
| <b>Quality of life</b>                   | Continuous                                                                                         |

\* Occupation included current profession of unretired participants and former profession for the retired. Professional personnel were professional and technical personnel, i.e. teachers, doctors, lawyers, engineer, etc.

† Public insurance included new cooperative medical scheme in rural area (NCMS), urban employee basic medical insurance (UEBMI), urban resident basic medical insurance (URBMI) and government medical insurance (GMI). Commercial medical insurance (CMI) was supplements of public medical insurance purchased by respondents' employers or by themselves.

‡ Duration of VI was defined by the period from the time which the participants became their current visual impaired level.

§ Direct medical costs measured the cost of resources used for treating a particular illness, consisted of outpatient costs, inpatient costs and self-purchased drugs costs. Expenditures for medicine prescribed and purchased during outpatient and inpatient visits in hospitals were included in outpatient and inpatient drug costs, respectively. The cost of self-purchased drugs was the expense of the drugs that patients bought in pharmacies (not in hospitals) for their ocular disease treatment after the initial diagnosis.

|| Cost of escort were meals, transport and accommodation costs encountered by patients' escorts during all outpatient or inpatient visits.
