# Supplementary material for: Burden of visual impairment associated with eye diseases: exploratory survey of 298 Chinese patients
Source: PubMed Central journal article supplement — BMJ Open. 2019 Sep 12;9(9):e030561. doi: 10.1136/bmjopen-2019-030561 (PMC6747637; doi:10.1136/bmjopen-2019-030561), 2019-09-12
Supplement: bmjopen-2019-030561supp002.pdf [file bmjopen-2019-030561supp002.pdf]

## Supplementary File

## Burden of visual impairment associated with eye diseases: an exploratory survey of 298 Chinese patients

## Appendix 2 Annual direct costs of different visual impaired patients in China.

| Characteristics          | Direct medical costs (USD) |                |                      |                | Direct non-medical costs (USD) |                |                       |              |                                |                    | Total direct costs (USD) |                |
|--------------------------|----------------------------|----------------|----------------------|----------------|--------------------------------|----------------|-----------------------|--------------|--------------------------------|--------------------|--------------------------|----------------|
|                          | Outpatient                 | Inpatient      | Self-purchased drugs | Total          | Long-term home care            | Transportation | Food or accommodation | Escort       | Nutrition or assistive devices | Home modifications |                          | Total          |
| <b>Total</b>             | <b>3,408.5</b>             | <b>1,369.5</b> | <b>131.8</b>         | <b>4,909.8</b> | <b>1,216.6</b>                 | <b>149.8</b>   | <b>176.7</b>          | <b>161.1</b> | <b>277.1</b>                   | <b>97.5</b>        | <b>2,078.8</b>           | <b>6,988.6</b> |
| <b>Age</b>               |                            |                |                      |                |                                |                |                       |              |                                |                    |                          |                |
| 19-50 years old          | 2,009.3                    | 3,572.4        | 211.5                | 5,793.2        | 1,269.1                        | 248.1          | 407.7                 | 249.6        | 77.8                           | 43.2               | 2,295.5                  | 8,088.7        |
| 51-70 years old          | 3,479.0                    | 1,062.6        | 156.3                | 4,697.9        | 963.7                          | 161.1          | 216.6                 | 178.5        | 226.3                          | 75.3               | 1,821.6                  | 6,519.6        |
| 71-90 years old          | 3,749.9                    | 1,014.6        | 85.8                 | 4,850.3        | 1,437.2                        | 110.6          | 72.4                  | 119.1        | 382.4                          | 134.0              | 2,255.7                  | 7,106.0        |
| <b>Gender</b>            |                            |                |                      |                |                                |                |                       |              |                                |                    |                          |                |
| Male                     | 3,321.3                    | 1,860.7        | 98.6                 | 5,280.6        | 1,069.2                        | 130.7          | 132.7                 | 179.2        | 300.4                          | 118.4              | 1,930.6                  | 7,211.2        |
| Female                   | 3,487.8                    | 922.4          | 162.0                | 4,572.3        | 1,350.8                        | 167.2          | 216.9                 | 144.6        | 255.8                          | 78.5               | 2,213.8                  | 6,786.0        |
| <b>Ethnicity</b>         |                            |                |                      |                |                                |                |                       |              |                                |                    |                          |                |
| Han                      | 3,404.2                    | 1,325.0        | 130.2                | 4,859.4        | 1,039.7                        | 135.5          | 166.1                 | 167.0        | 250.6                          | 86.5               | 1,845.5                  | 6,704.8        |
| Minority                 | 3,468.1                    | 1,988.2        | 154.7                | 5,611.0        | 3,675.2                        | 348.7          | 324.7                 | 78.2         | 645.0                          | 250.4              | 5,322.3                  | 10,933.2       |
| <b>Educational level</b> |                            |                |                      |                |                                |                |                       |              |                                |                    |                          |                |
| Primary and below        | 2,924.6                    | 991.6          | 85.3                 | 4,001.6        | 2,331.9                        | 173.9          | 138.3                 | 96.1         | 146.7                          | 51.3               | 2,938.2                  | 6,939.8        |
| Middle and high school   | 3,894.0                    | 1,440.2        | 174.5                | 5,508.7        | 887.0                          | 134.9          | 163.0                 | 210.6        | 237.4                          | 117.8              | 1,750.8                  | 7,259.6        |
| College and above        | 2,778.4                    | 1,598.7        | 80.5                 | 4,457.7        | 822.8                          | 159.4          | 248.9                 | 113.2        | 505.8                          | 98.3               | 1,948.5                  | 6,406.2        |
| <b>Occupation</b>        |                            |                |                      |                |                                |                |                       |              |                                |                    |                          |                |
| Management personnel     | 5,325.1                    | 2,859.9        | 131.6                | 8,316.6        | 840.4                          | 125.8          | 115.9                 | 149.4        | 274.8                          | 38.4               | 1,544.7                  | 9,861.3        |
| Professional personnel   | 3,924.7                    | 1,129.7        | 137.3                | 5,191.6        | 1,035.5                        | 182.0          | 281.2                 | 207.9        | 503.9                          | 111.5              | 2,322.1                  | 7,513.7        |
| General staff            | 2,751.8                    | 1,414.9        | 97.5                 | 4,264.1        | 1,592.0                        | 156.1          | 136.3                 | 97.0         | 211.6                          | 109.5              | 2,302.4                  | 6,566.5        |
| Farmer                   | 3,246.6                    | 483.0          | 137.8                | 3,867.3        | 1,036.3                        | 128.3          | 141.2                 | 147.0        | 127.0                          | 32.6               | 1,612.5                  | 5,479.8        |
| Other professions        | 2,467.8                    | 2,635.3        | 146.8                | 5,249.9        | 2,731.9                        | 172.9          | 242.8                 | 226.6        | 531.3                          | 275.9              | 4,181.6                  | 9,431.4        |
| Unemployed               | 2,536.8                    | 1,487.3        | 204.9                | 4,229.1        | 758.8                          | 100.0          | 119.8                 | 242.1        | 40.4                           | 144.4              | 1,405.7                  | 5,634.8        |
| <b>Marital status</b>    |                            |                |                      |                |                                |                |                       |              |                                |                    |                          |                |
| Unmarried                | 869.9                      | 1,715.0        | 172.2                | 2,757.1        | 1,922.0                        | 78.0           | 59.7                  | 71.5         | 120.7                          | 79.4               | 2,331.4                  | 5,088.5        |
| Married                  | 3,848.2                    | 1,309.6        | 124.8                | 5,282.7        | 1,094.4                        | 162.2          | 197.0                 | 176.6        | 304.2                          | 100.6              | 2,035.1                  | 7,317.8        |
| <b>Living status</b>     |                            |                |                      |                |                                |                |                       |              |                                |                    |                          |                |
| Alone                    | 1,546.6                    | 1,218.0        | 138.6                | 2,903.2        | 1,015.9                        | 82.9           | 39.2                  | 126.8        | 158.1                          | 95.8               | 1,518.7                  | 4,422.0        |
| With family              | 3,514.1                    | 1,378.1        | 131.4                | 5,023.6        | 1,228.0                        | 153.6          | 184.6                 | 163.0        | 283.8                          | 97.6               | 2,110.6                  | 7,134.3        |

| Characteristics          | Direct medical costs (USD) |           |                      |         | Direct non-medical costs (USD) |                |                       |        |                                |                    |         | Total direct costs (USD) |
|--------------------------|----------------------------|-----------|----------------------|---------|--------------------------------|----------------|-----------------------|--------|--------------------------------|--------------------|---------|--------------------------|
|                          | Outpatient                 | Inpatient | Self-purchased drugs | Total   | Long-term home care            | Transportation | Food or accommodation | Escort | Nutrition or assistive devices | Home modifications | Total   |                          |
| <b>Current residence</b> |                            |           |                      |         |                                |                |                       |        |                                |                    |         |                          |
| Urban                    | 3,463.3                    | 1,411.9   | 105.2                | 4,980.5 | 1,347.2                        | 143.6          | 176.7                 | 136.5  | 319.9                          | 111.6              | 2,235.7 | 7,216.1                  |
| Rural                    | 3,268.7                    | 1,261.5   | 199.5                | 4,729.8 | 883.8                          | 165.5          | 176.9                 | 223.8  | 167.8                          | 61.5               | 1,679.8 | 6,409.1                  |
| <b>Medical insurance</b> |                            |           |                      |         |                                |                |                       |        |                                |                    |         |                          |
| None                     | 298.9                      | 4,249.6   | 202.1                | 4,750.5 | 4,078.8                        | 192.6          | 147.0                 | 180.2  | 154.5                          | 151.8              | 4,905.0 | 9,655.5                  |
| NCMS                     | 3,488.4                    | 1,208.2   | 209.3                | 4,905.9 | 881.5                          | 156.2          | 173.2                 | 233.0  | 96.9                           | 42.8               | 1,583.8 | 6,489.6                  |
| URBMI                    | 3,258.8                    | 359.3     | 65.0                 | 3,683.1 | 1,061.2                        | 71.0           | 23.5                  | 86.2   | 103.0                          | 25.0               | 1,370.0 | 5,053.1                  |
| UEBMI                    | 3,351.3                    | 1,658.9   | 123.1                | 5,133.3 | 1,251.4                        | 181.4          | 225.9                 | 115.2  | 326.5                          | 112.1              | 2,212.4 | 7,345.7                  |
| GMI                      | 3,924.8                    | 1,368.5   | 92.1                 | 5,385.3 | 1,585.7                        | 128.4          | 183.4                 | 252.0  | 500.4                          | 195.1              | 2,845.0 | 8,230.3                  |
| CMI                      | 4,160.8                    | 888.9     | 85.7                 | 5,135.4 | 311.7                          | 104.2          | 197.8                 | 130.1  | 653.7                          | 130.1              | 1,527.6 | 6,663.0                  |
| <b>level of VI</b>       |                            |           |                      |         |                                |                |                       |        |                                |                    |         |                          |
| Moderate VI              | 3,120.7                    | 853.8     | 118.6                | 4,093.1 | 916.4                          | 142.4          | 138.5                 | 125.9  | 222.0                          | 65.3               | 1,610.4 | 5,703.5                  |
| Severe VI                | 4,479.9                    | 1,694.5   | 147.5                | 6,321.8 | 1,793.8                        | 158.7          | 226.7                 | 128.2  | 293.3                          | 137.0              | 2,737.6 | 9,059.5                  |
| Blind                    | 2,301.6                    | 2,995.5   | 156.8                | 5,453.9 | 1,284.8                        | 163.9          | 238.9                 | 396.6  | 492.7                          | 155.8              | 2,732.6 | 8,186.5                  |
| <b>duration of VI</b>    |                            |           |                      |         |                                |                |                       |        |                                |                    |         |                          |
| 3-6 months               | 1,574.8                    | 503.8     | 225.0                | 2,303.6 | 1,643.7                        | 103.1          | 89.4                  | 110.6  | 308.8                          | 123.5              | 2,379.2 | 4,682.7                  |
| 6-12 months              | 2,182.5                    | 1,070.6   | 70.9                 | 3,324.0 | 429.4                          | 152.8          | 282.8                 | 104.2  | 104.5                          | 85.4               | 1,159.1 | 4,483.0                  |
| More than 12 months      | 3,992.0                    | 1,582.2   | 129.8                | 5,703.9 | 1,321.3                        | 157.0          | 167.6                 | 182.4  | 310.4                          | 95.9               | 2,234.6 | 7,938.6                  |
| <b>Cause of VI</b>       |                            |           |                      |         |                                |                |                       |        |                                |                    |         |                          |
| Cataract                 | 1,236.9                    | 583.9     | 27.5                 | 1,848.3 | 790.1                          | 55.1           | 67.7                  | 48.4   | 63.2                           | 19.4               | 1,043.7 | 2,892.0                  |
| AMD                      | 8,162.3                    | 524.7     | 134.8                | 8,821.8 | 346.9                          | 189.3          | 172.0                 | 174.6  | 480.9                          | 0.0                | 1,363.7 | 10,185.5                 |
| Vascular retinopathy     | 4,151.1                    | 2,270.9   | 249.9                | 6,671.9 | 930.5                          | 139.1          | 84.9                  | 141.1  | 237.9                          | 194.2              | 1,727.8 | 8,399.7                  |
| Glaucoma                 | 4,909.7                    | 2,297.1   | 208.0                | 7,414.8 | 380.0                          | 78.6           | 100.9                 | 102.7  | 118.7                          | 35.7               | 816.6   | 8,231.4                  |
| Other eye diseases       | 1,656.8                    | 2,350.2   | 180.2                | 4,187.1 | 1,781.2                        | 278.0          | 414.6                 | 203.0  | 145.3                          | 76.4               | 2,898.5 | 7,085.7                  |
| Multiple ocular diseases | 4,255.0                    | 1,286.8   | 142.7                | 5,684.5 | 1,882.8                        | 149.8          | 156.4                 | 256.8  | 550.9                          | 216.2              | 3,212.9 | 8,897.5                  |
| <b>Economic status</b>   |                            |           |                      |         |                                |                |                       |        |                                |                    |         |                          |
| Lowest                   | 3,662.3                    | 1,342.8   | 177.1                | 5,182.2 | 1,523.5                        | 254.6          | 315.7                 | 294.5  | 173.4                          | 36.0               | 2,597.8 | 7,780.0                  |
| Lower                    | 1,996.4                    | 1,738.2   | 95.0                 | 3,829.6 | 479.0                          | 174.2          | 295.0                 | 158.1  | 200.8                          | 54.9               | 1,362.1 | 5,191.7                  |
| Middle                   | 2,614.7                    | 1,345.7   | 142.5                | 4,102.9 | 1,196.1                        | 94.0           | 37.3                  | 77.9   | 220.6                          | 76.1               | 1,702.0 | 5,804.9                  |
| Higher                   | 4,761.2                    | 934.9     | 114.9                | 5,811.0 | 800.9                          | 84.0           | 49.2                  | 108.5  | 250.0                          | 5.0                | 1,297.7 | 7,108.7                  |
| Highest                  | 3,988.4                    | 1,491.6   | 129.7                | 5,609.8 | 2076.3                         | 144.4          | 190.8                 | 168.6  | 537.5                          | 313.7              | 3,431.3 | 9,041.1                  |

\* Abbreviations: NCMS, new cooperative medical scheme; UEBMI, urban employee basic medical insurance; URBMI, urban resident basic medical insurance; GMI, government medical insurance; CMI, commercial medical insurance.
